# Supplementary material for: Defective STIM-mediated store operated Ca2+ entry in hepatocytes leads to metabolic dysfunction in obesity
Source: eLife journal article supplement (doi:10.7554/elife.29968), 2017-12-15

**Figure 1B**

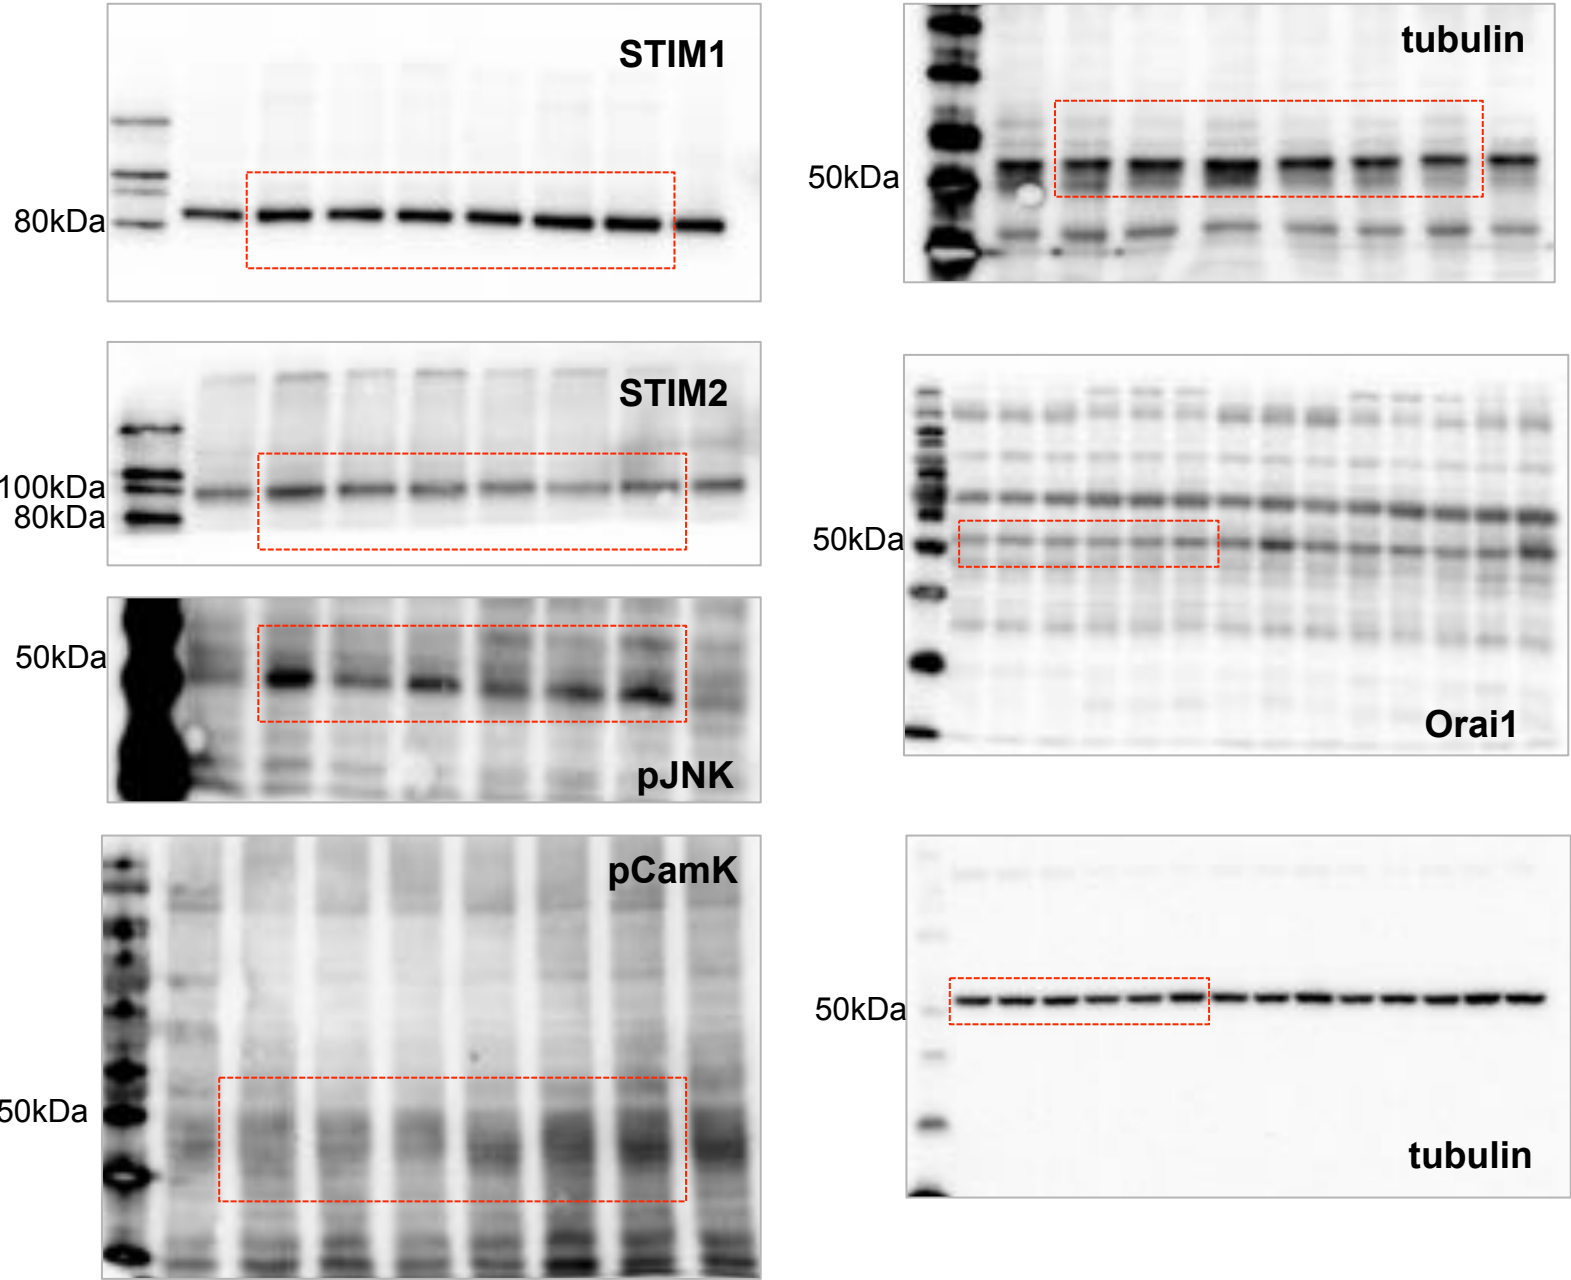

**Figure 1S1B**

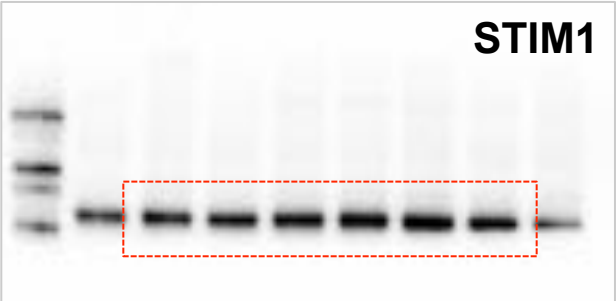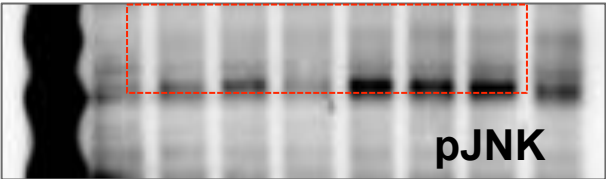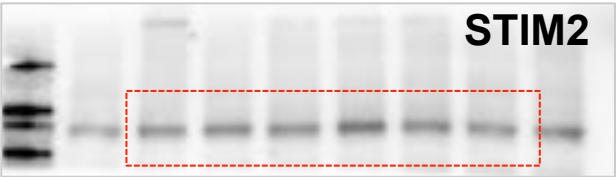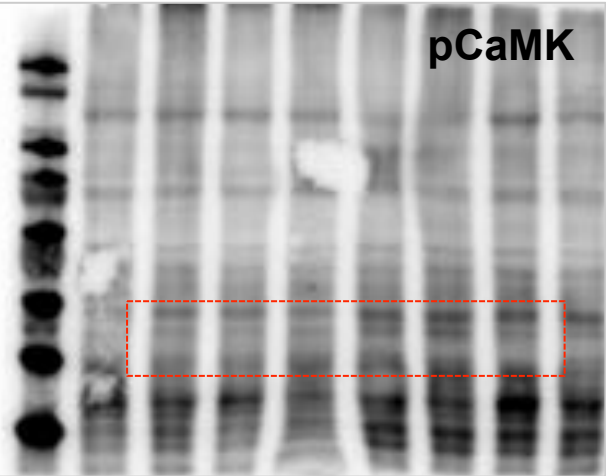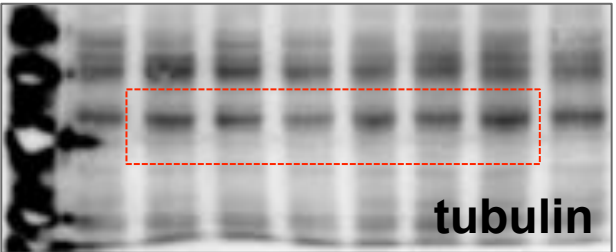

Figure 2A

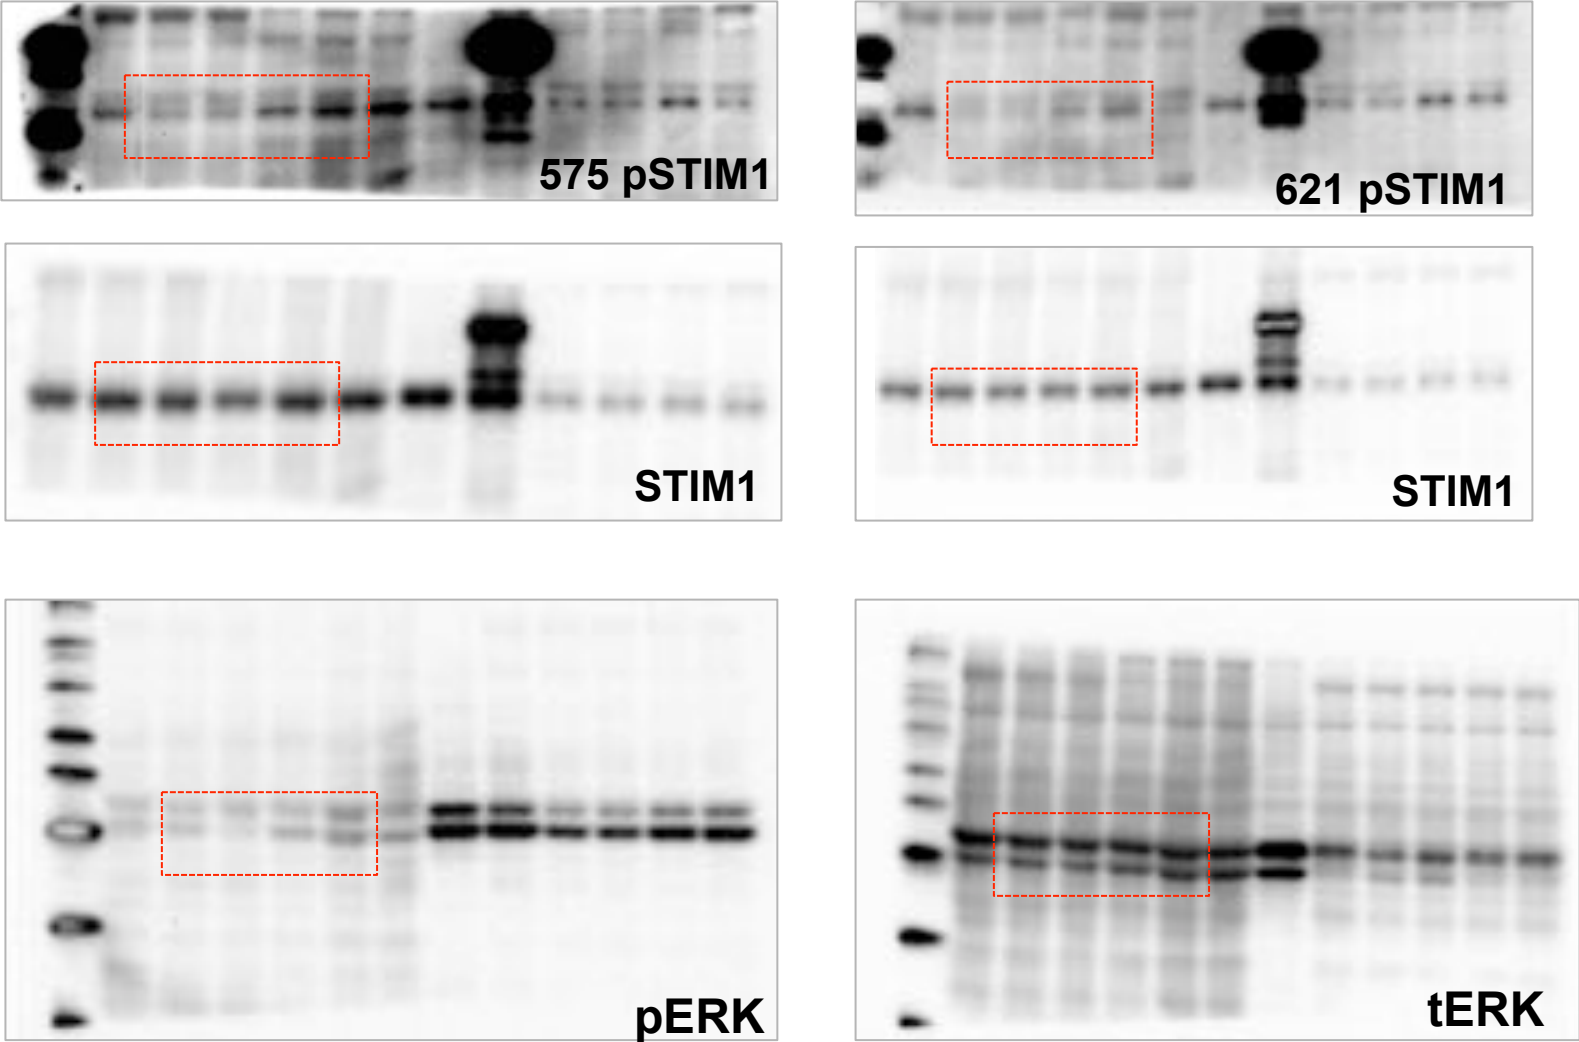

**Figure 2B**

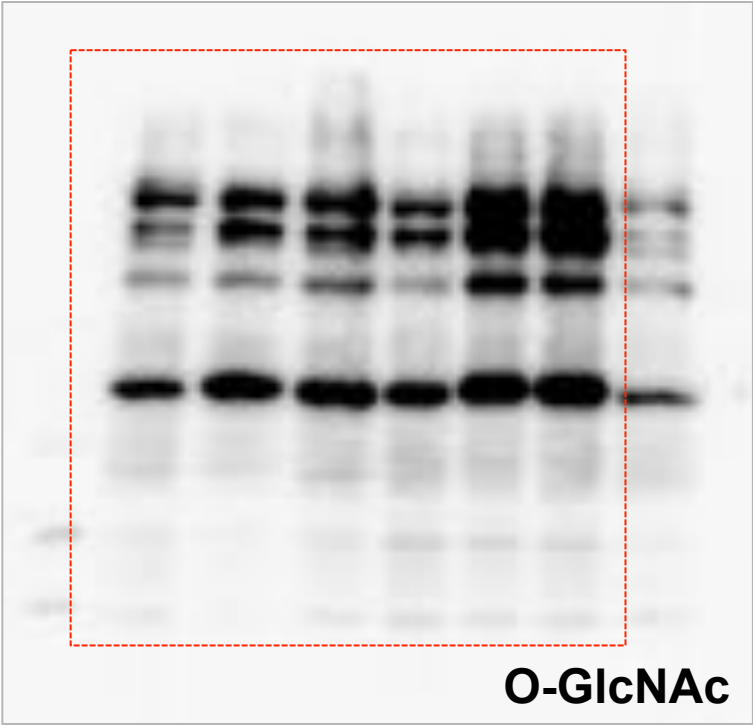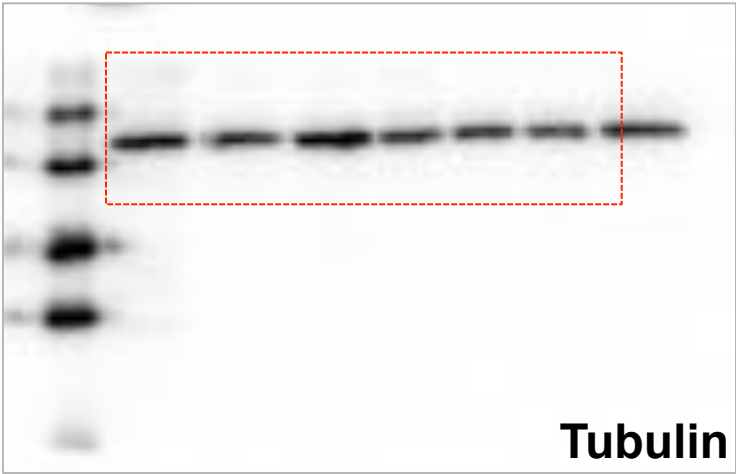

Figure 2C

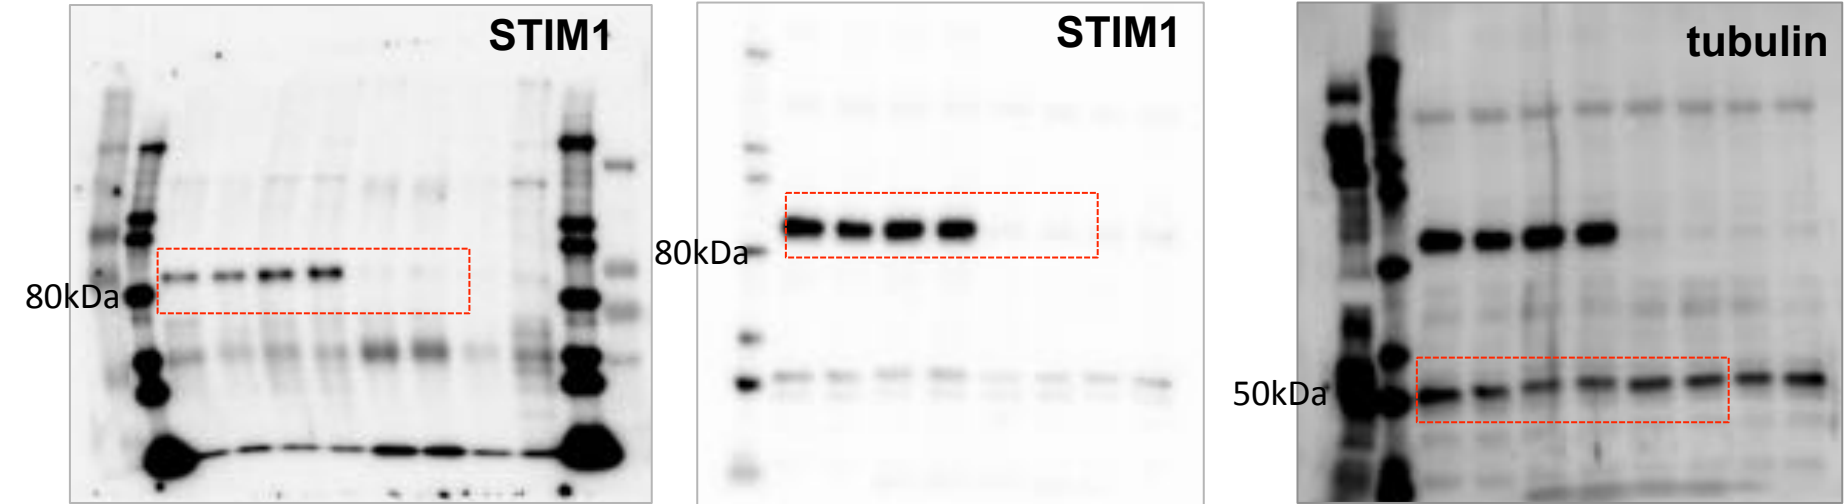

Figure 2D

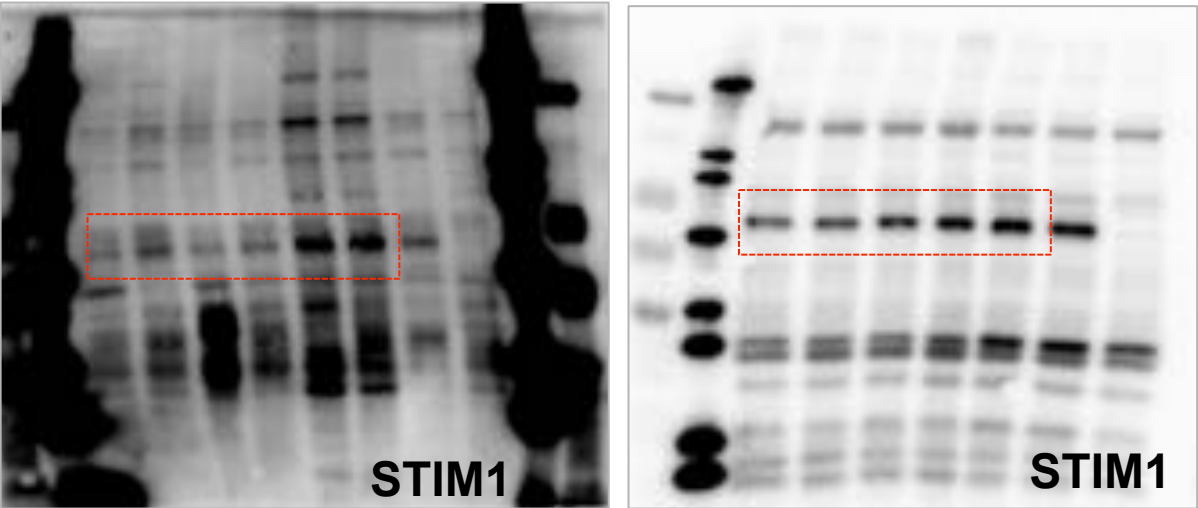

Silver stain

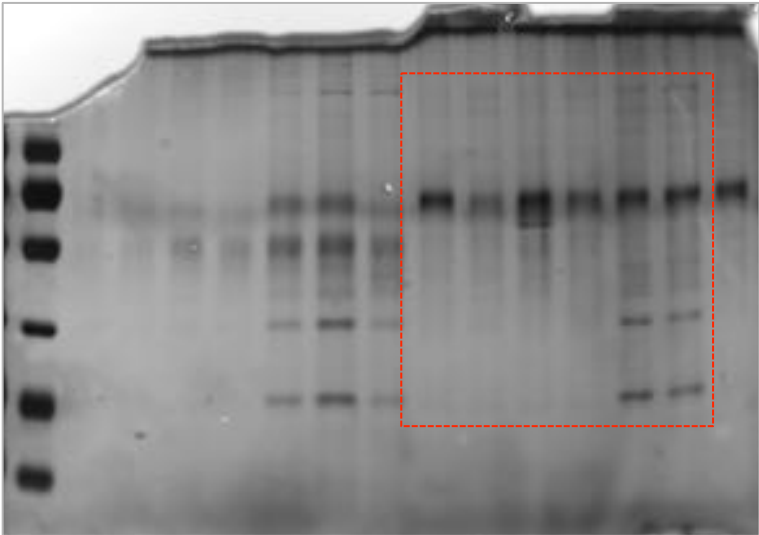

Figure 2E

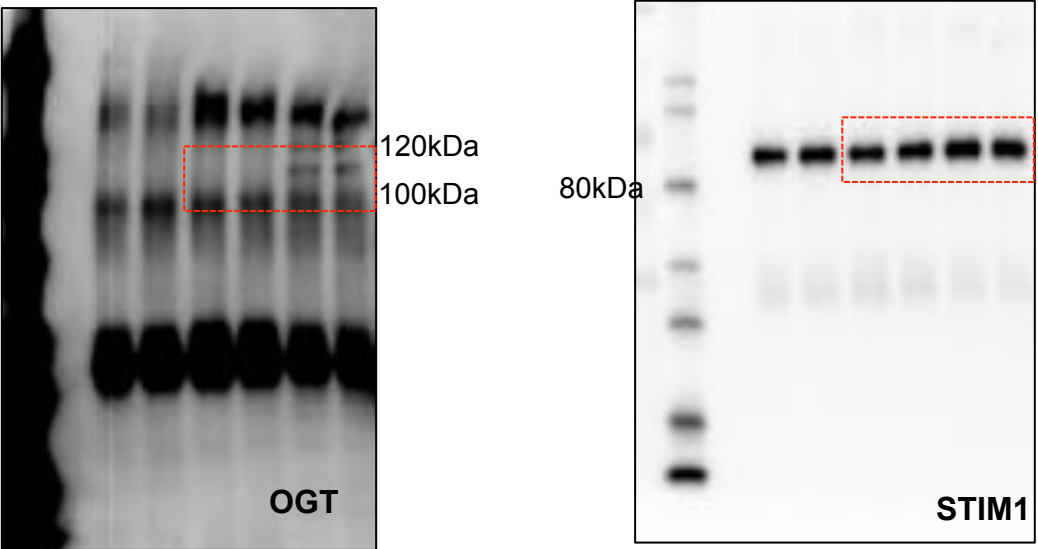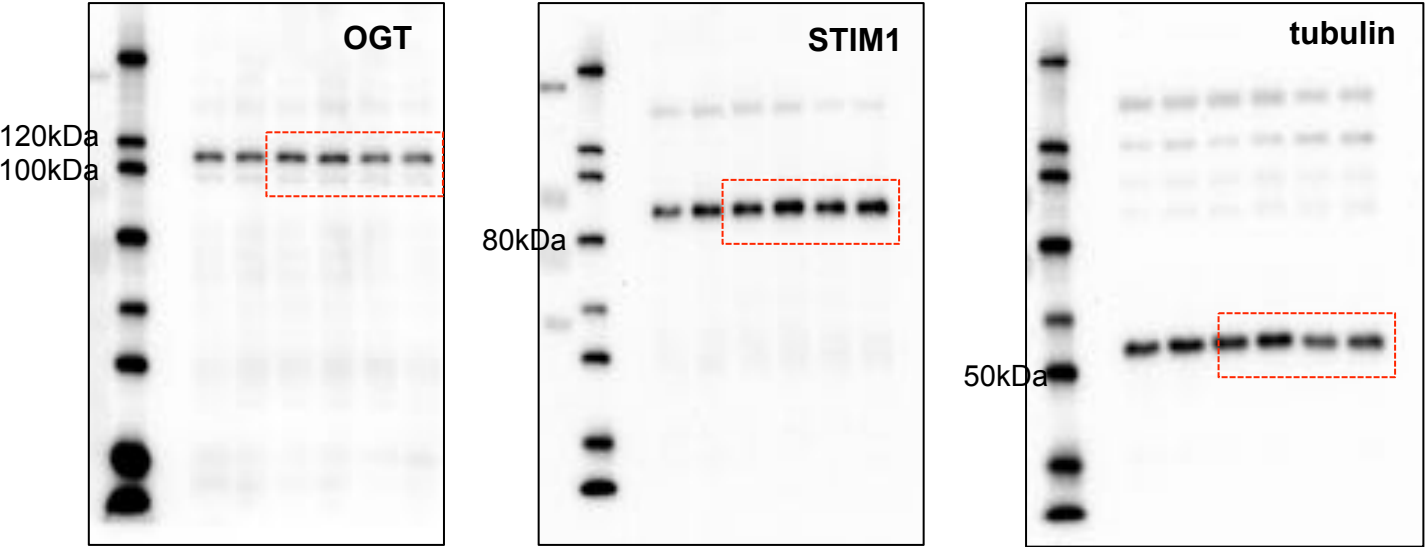

**Figure 2F**

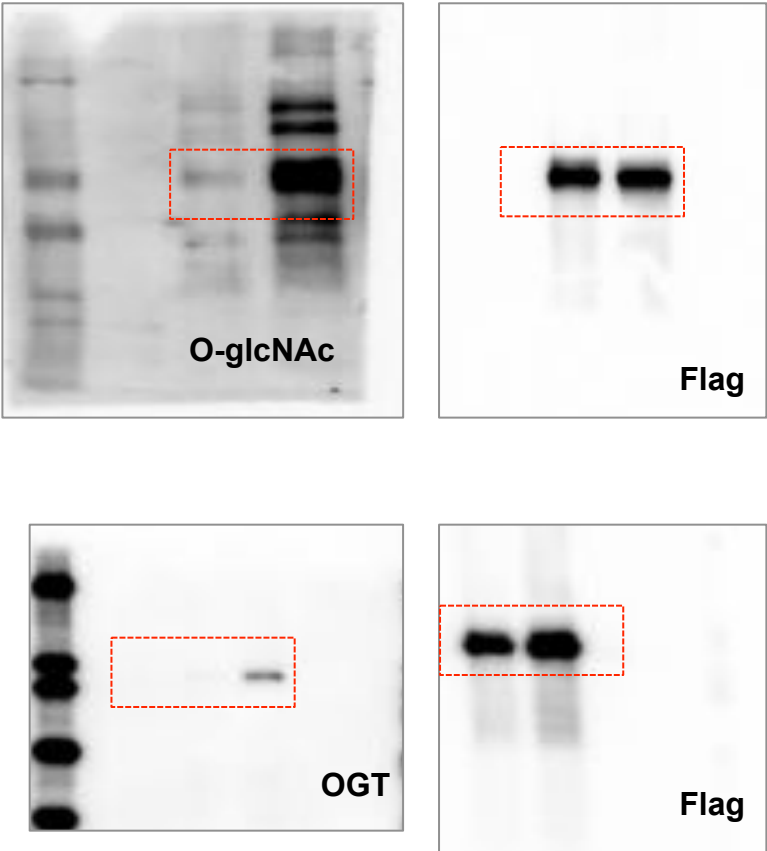



Figure 2K

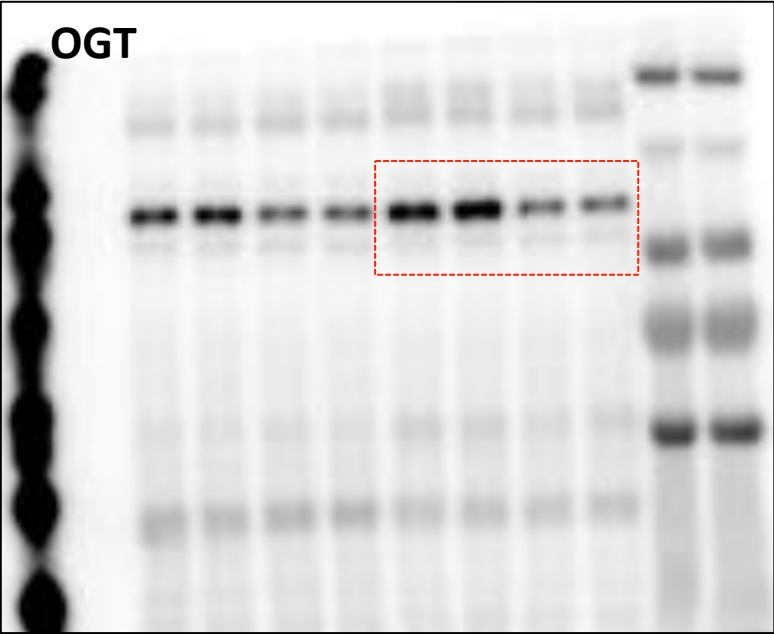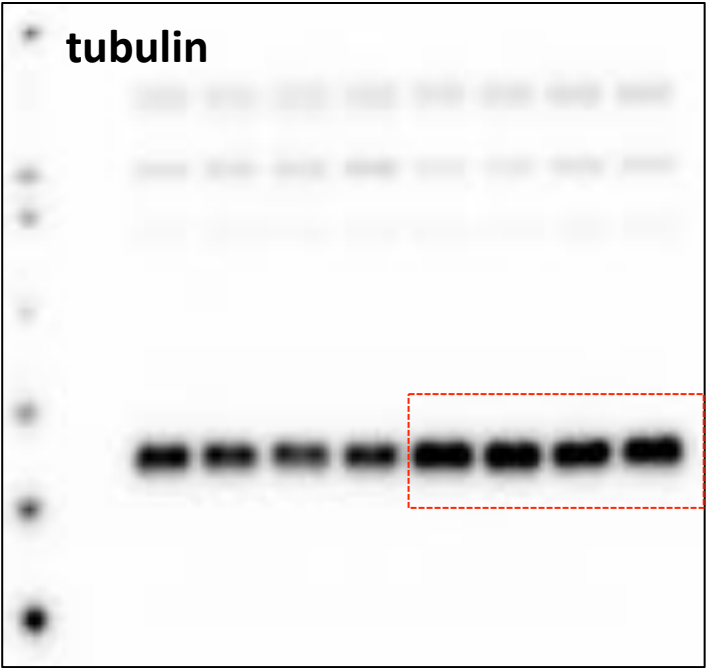

Figure 2L

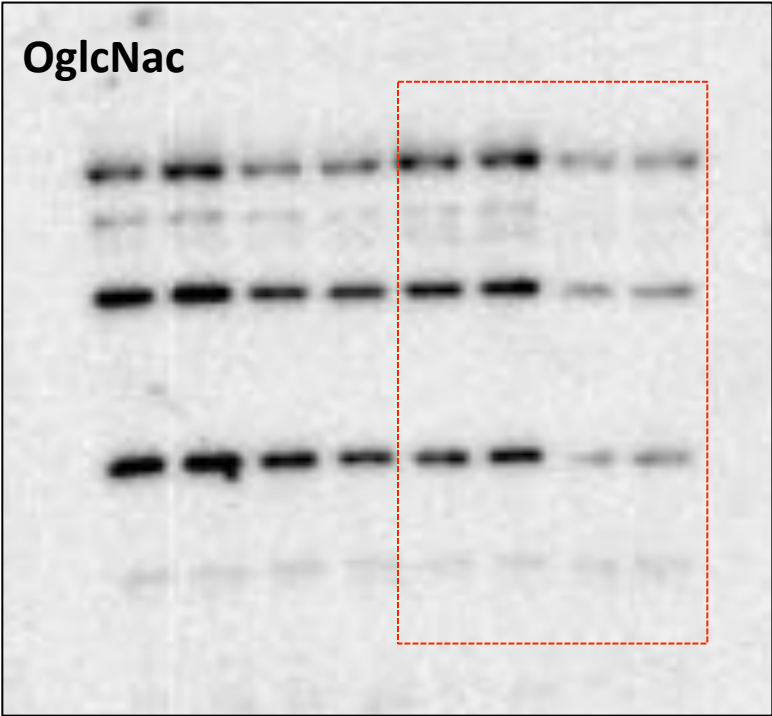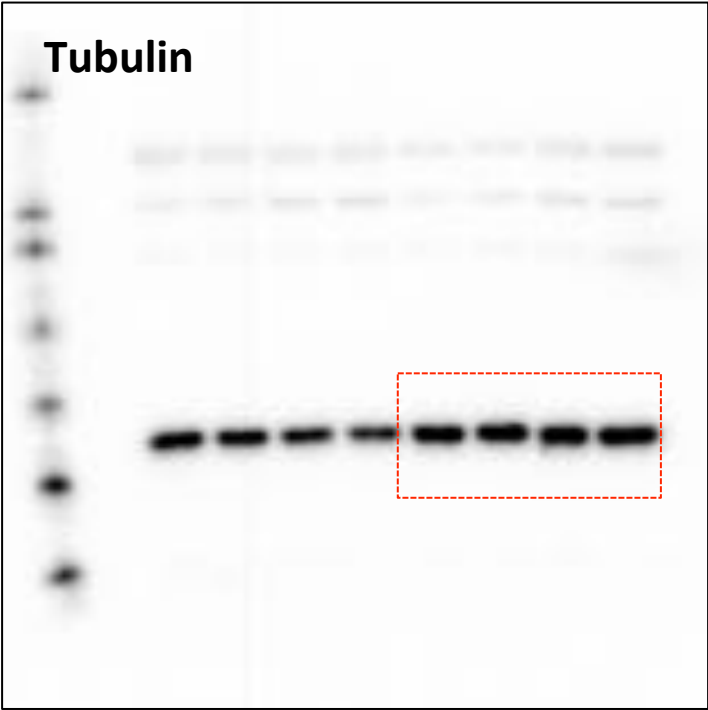

**Figure S2A**

**IP: WGA IB: STIM1**

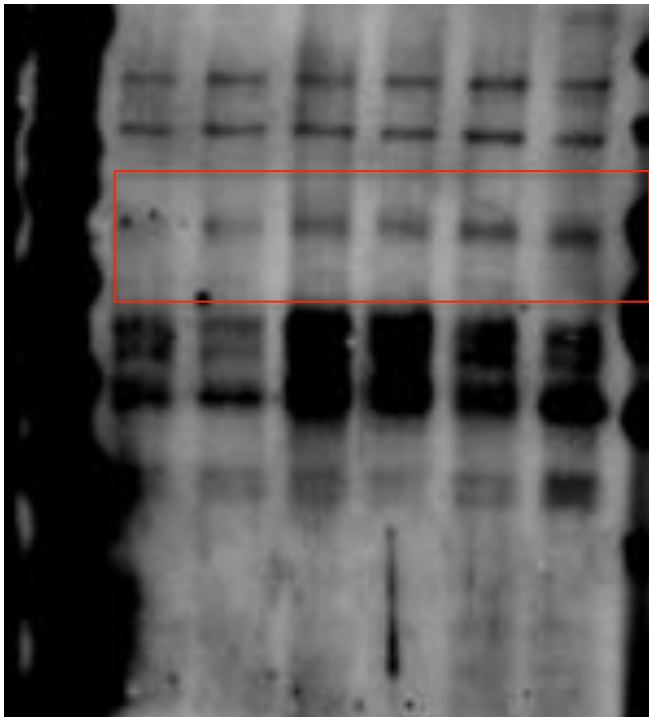

**IB: STIM1**

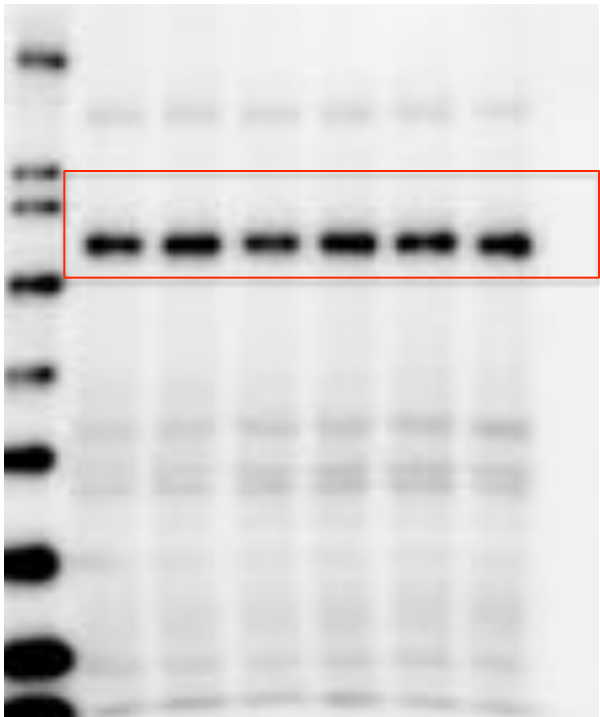

Figure S2B

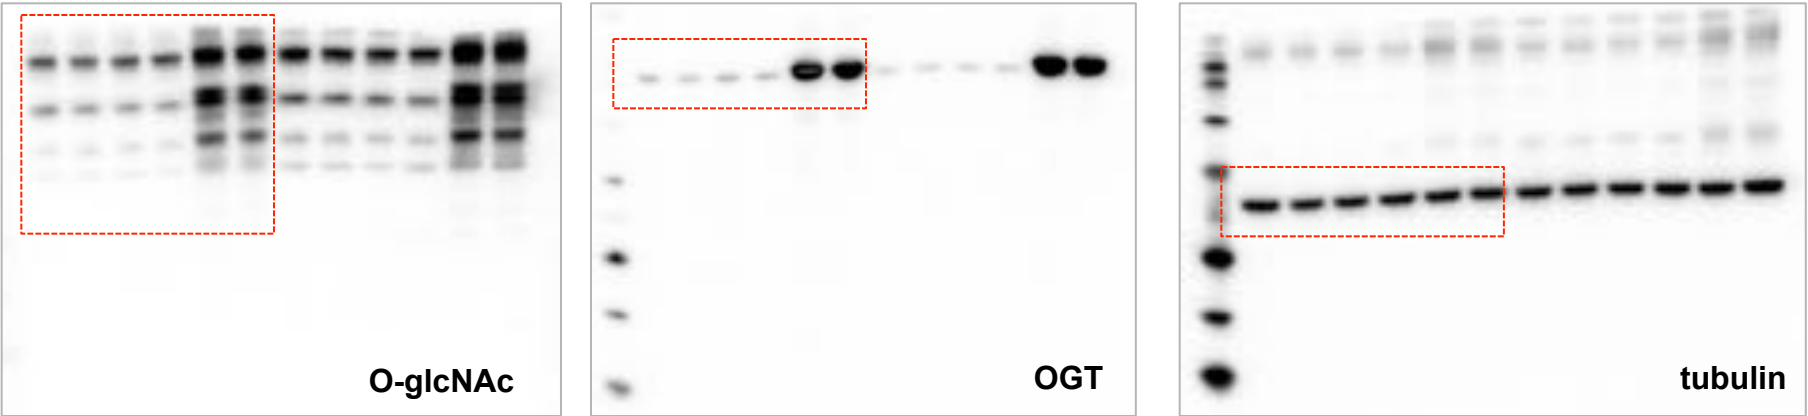

**Figure S2C**

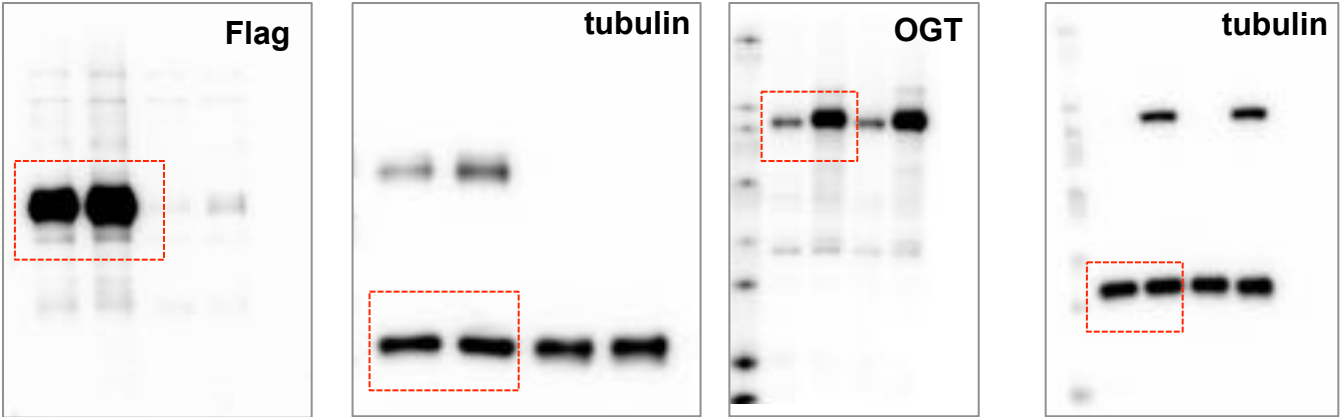

**Figure 3B**

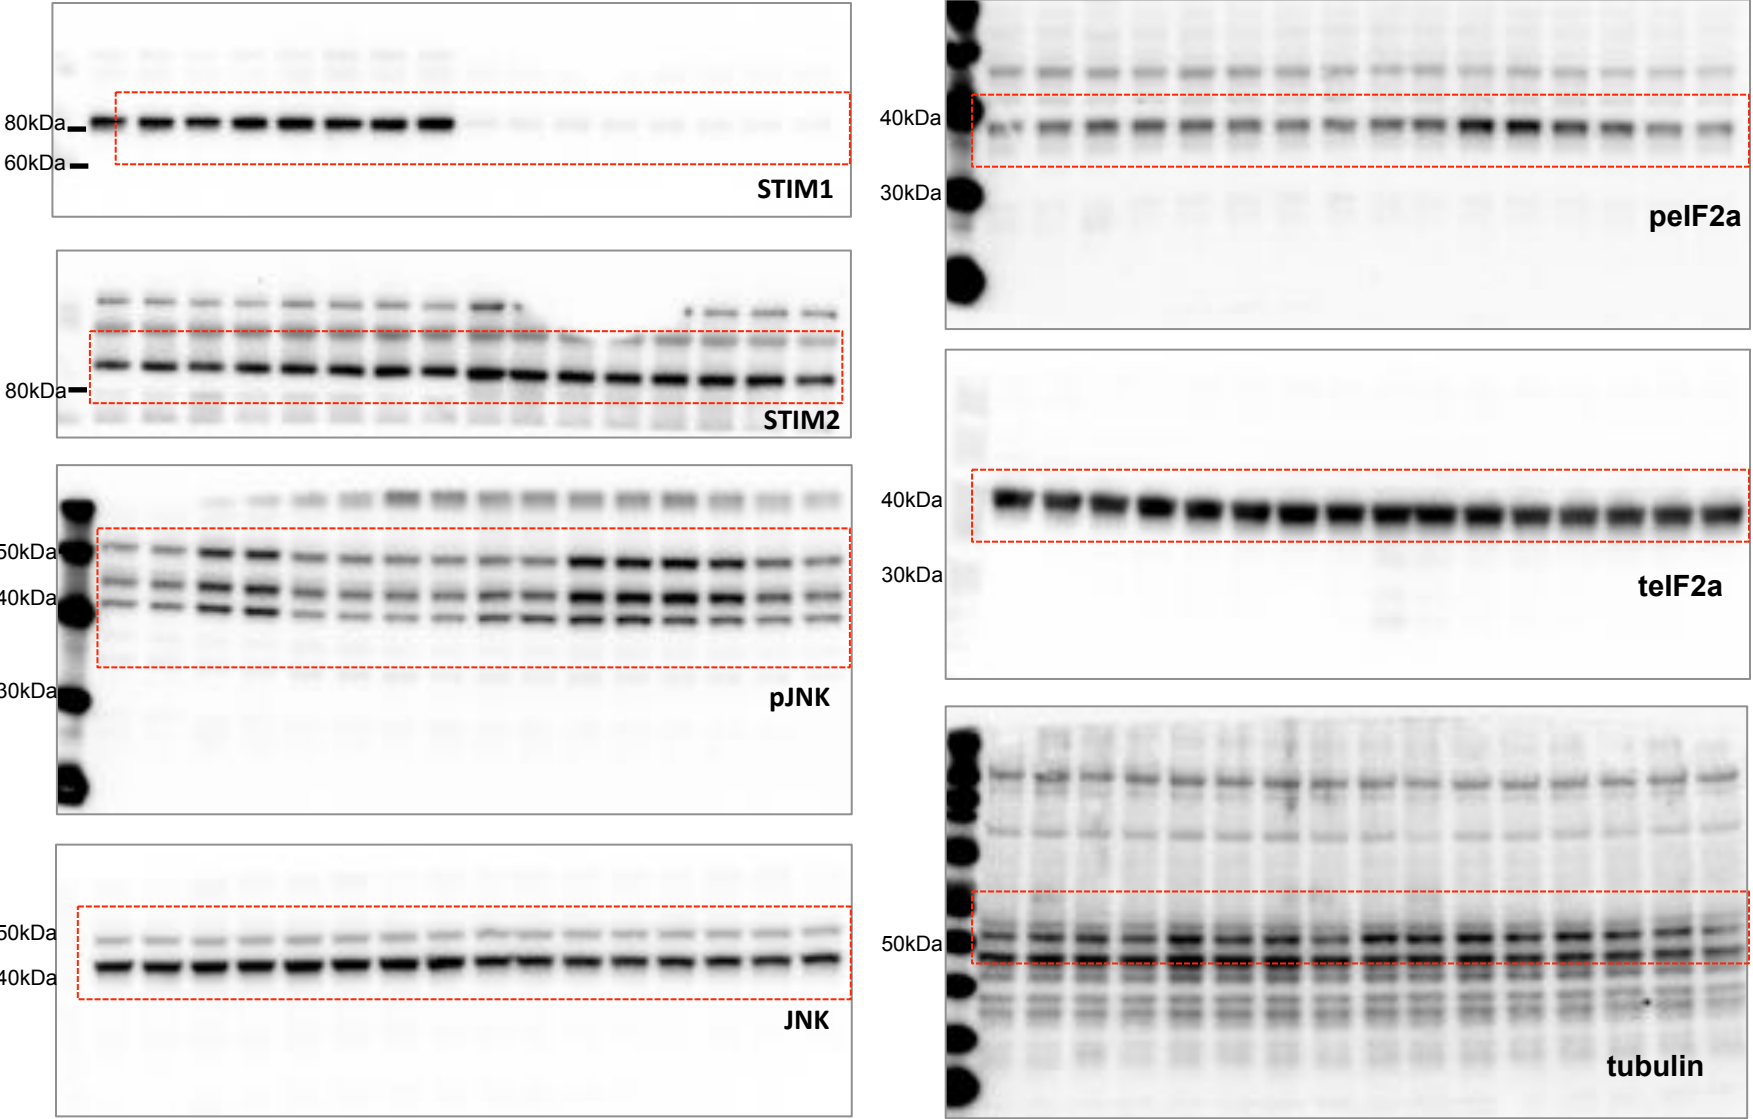

Figure 3C

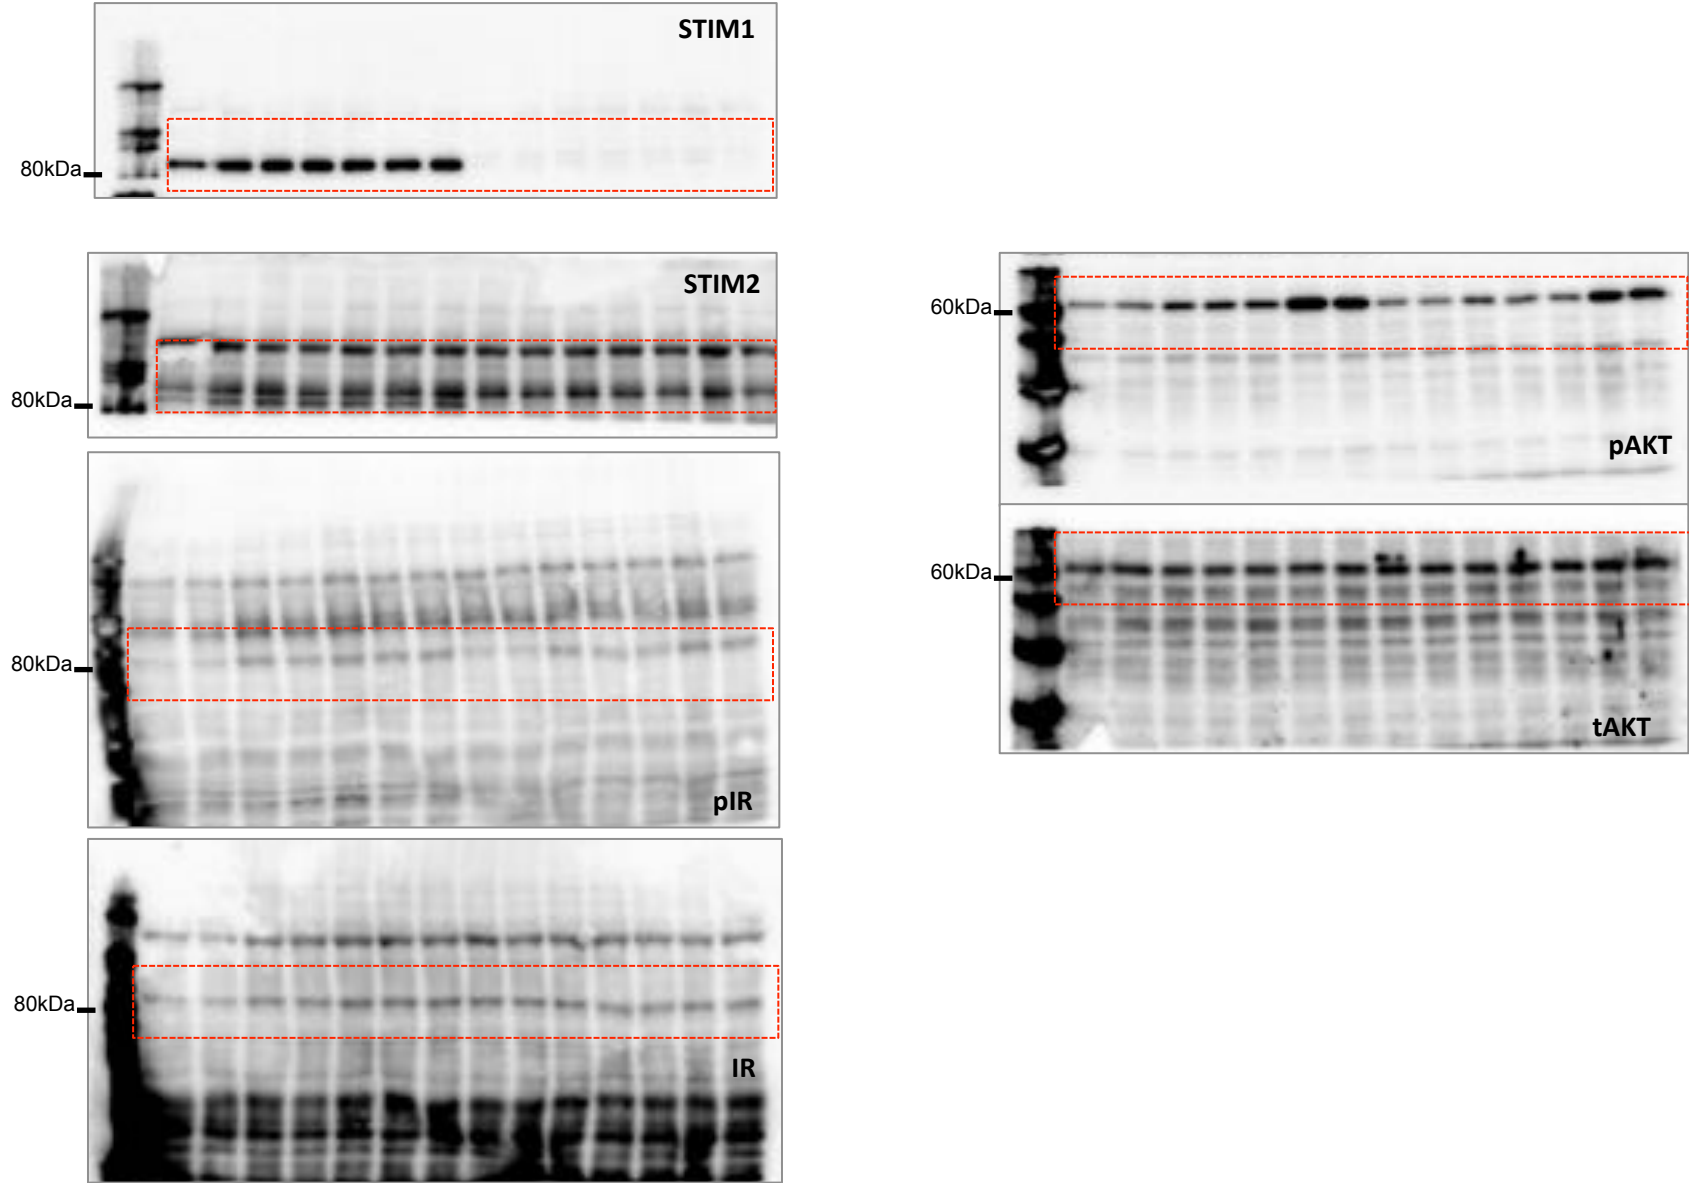

Figure 3F

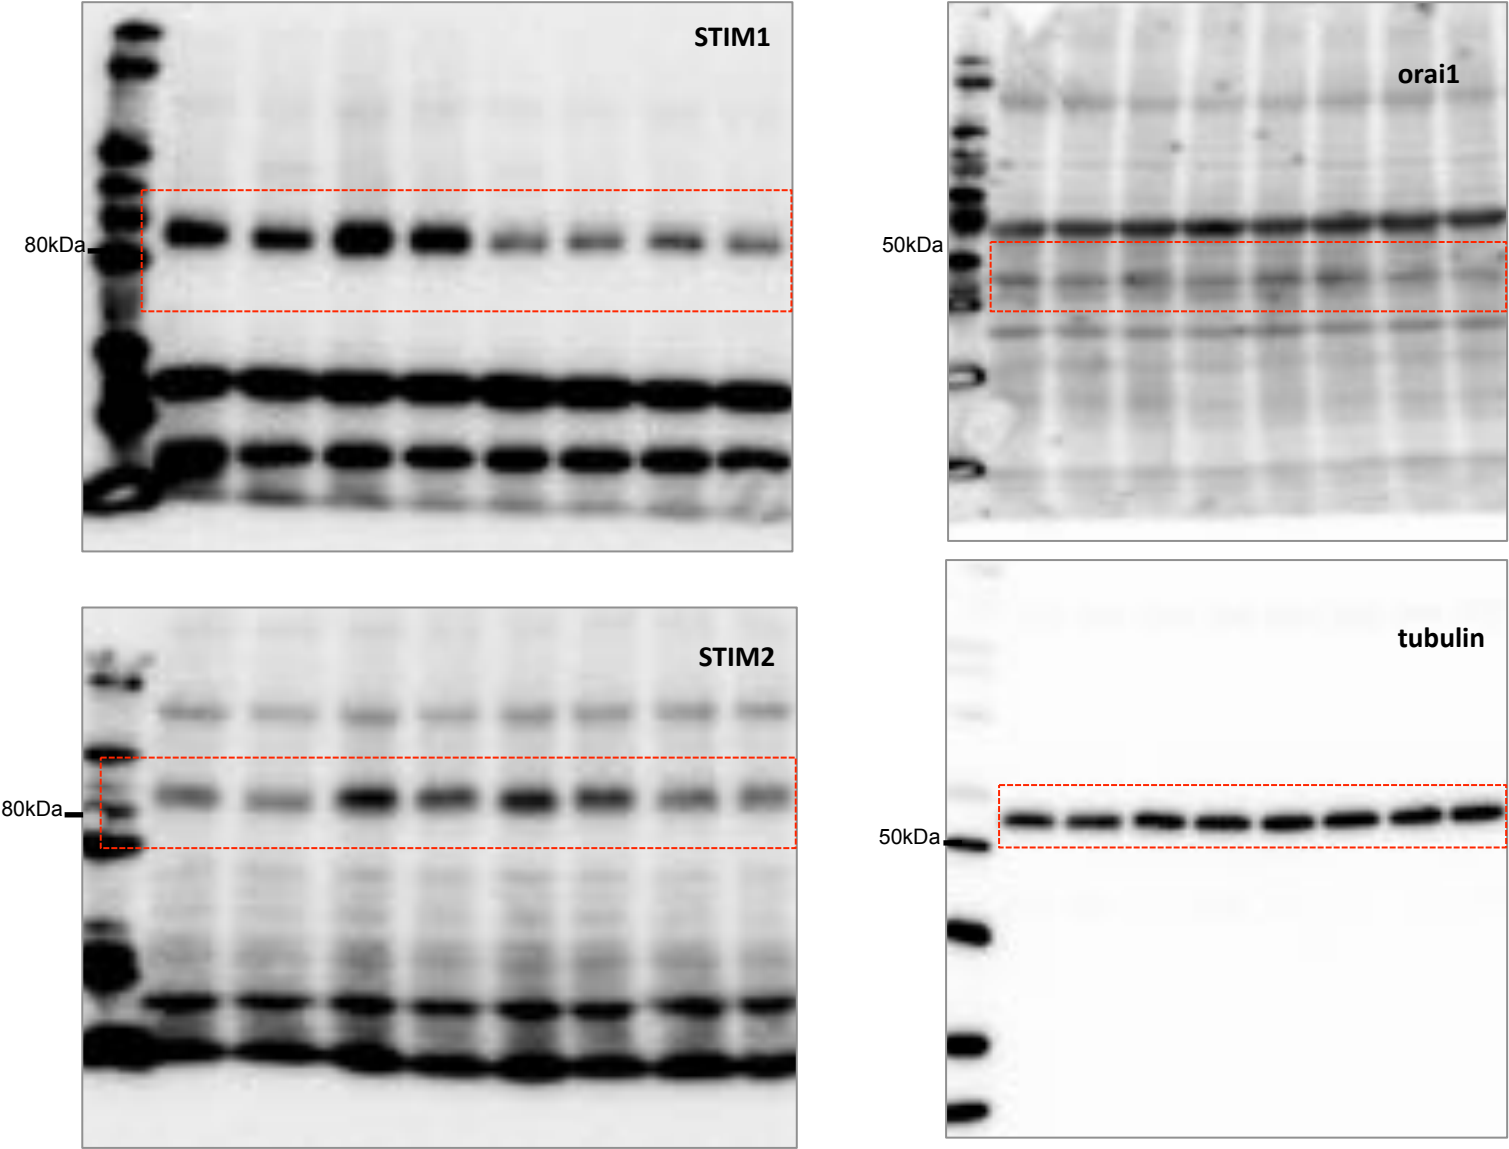



**Figure 3 S1A**

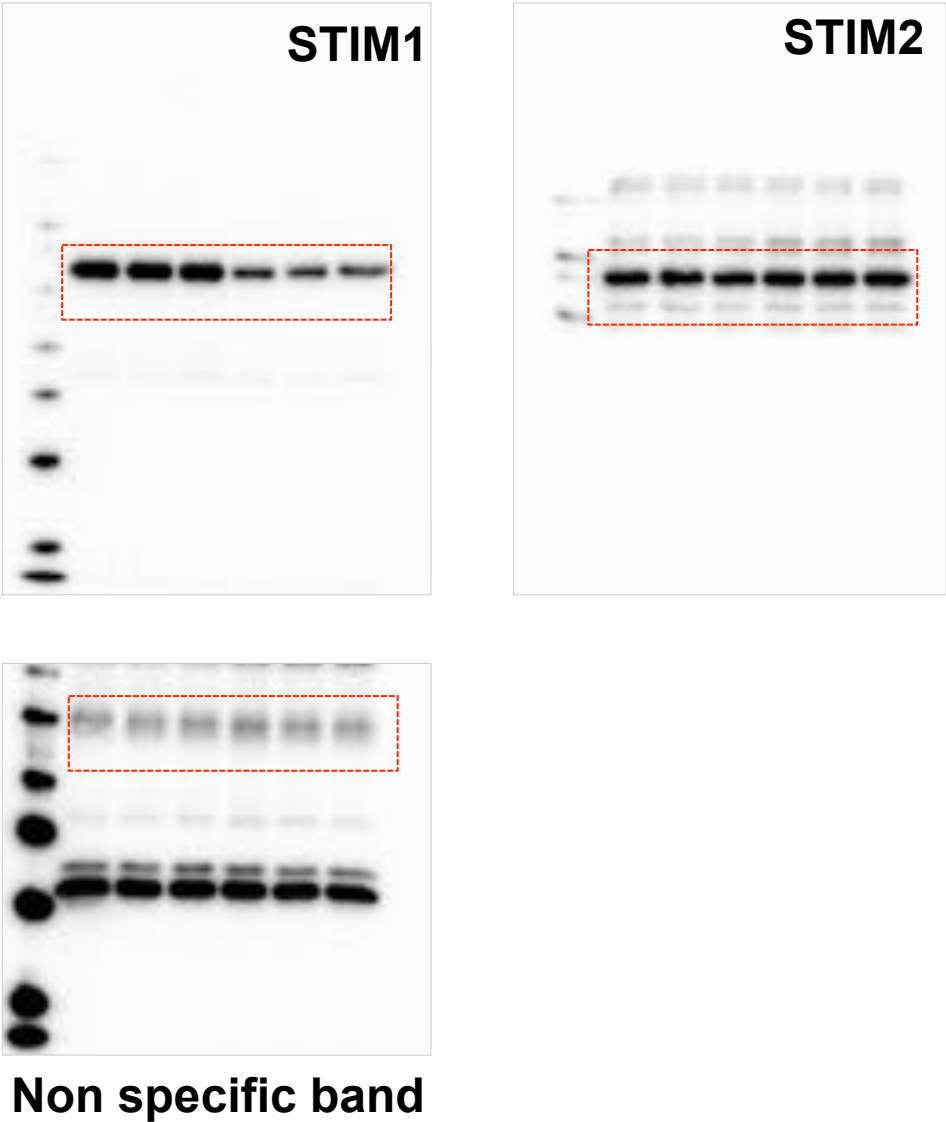

**Figure 3 S1B**

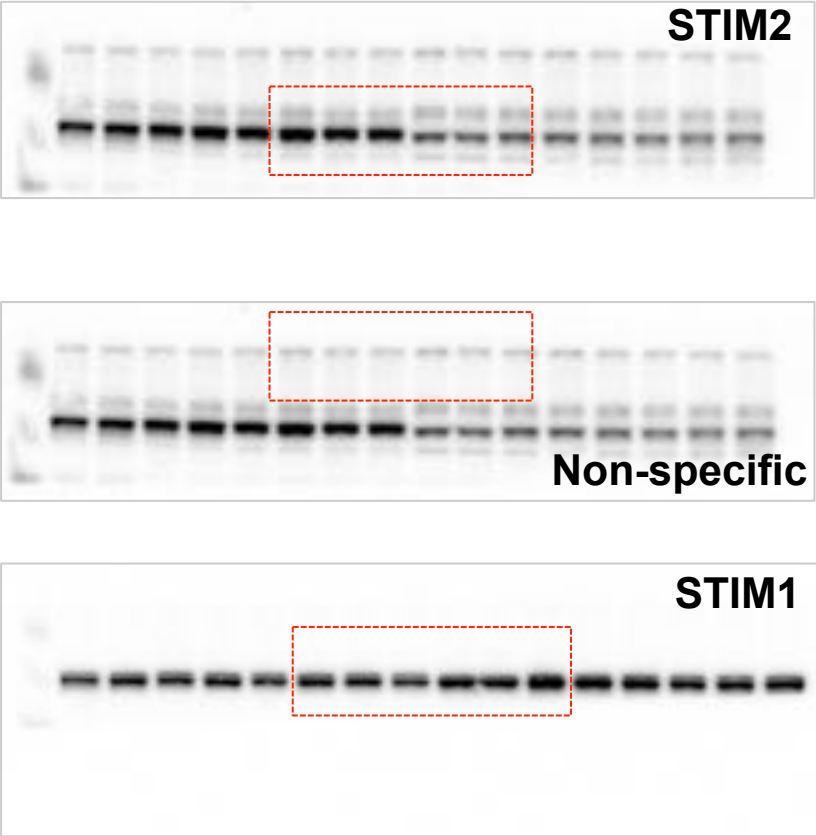

Figure 3 S1D

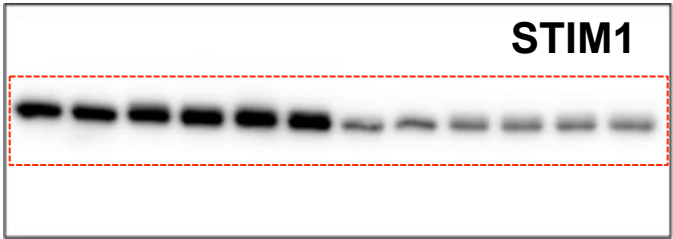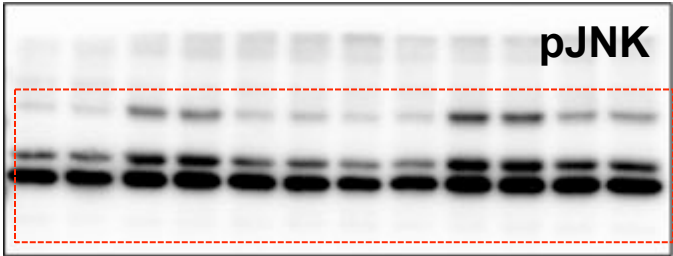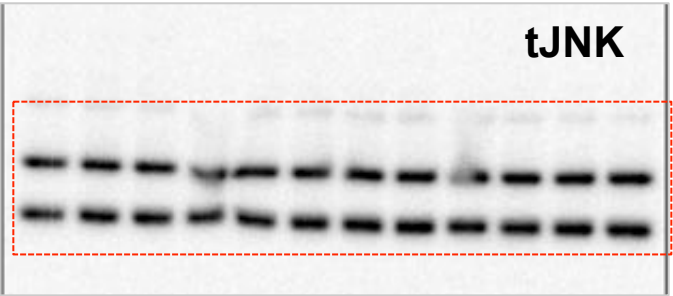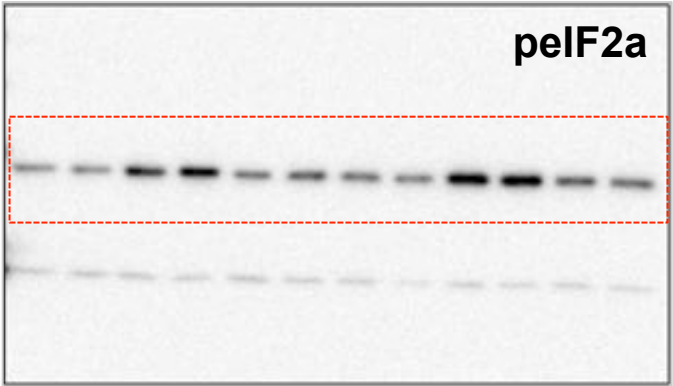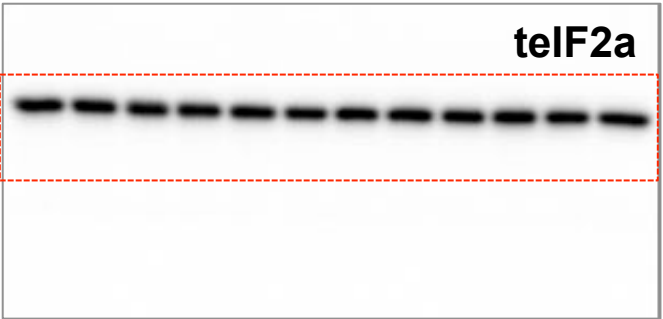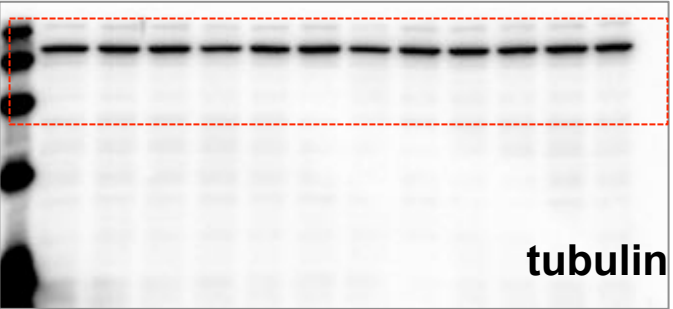

**Figure 3 S1E**

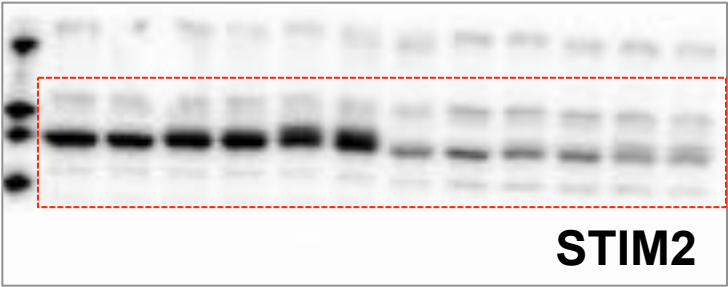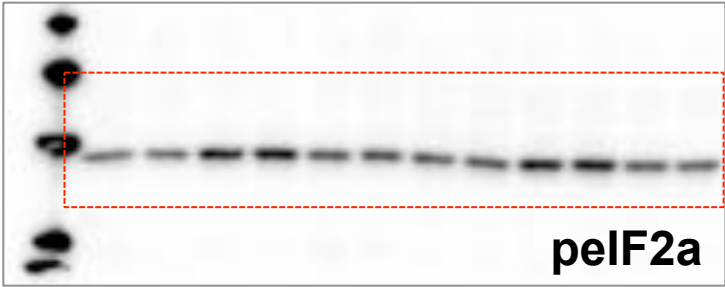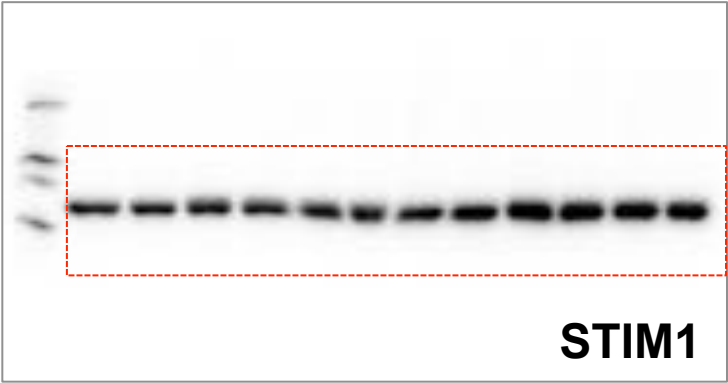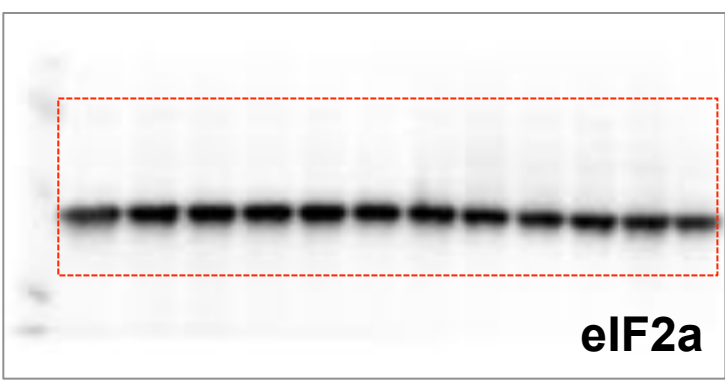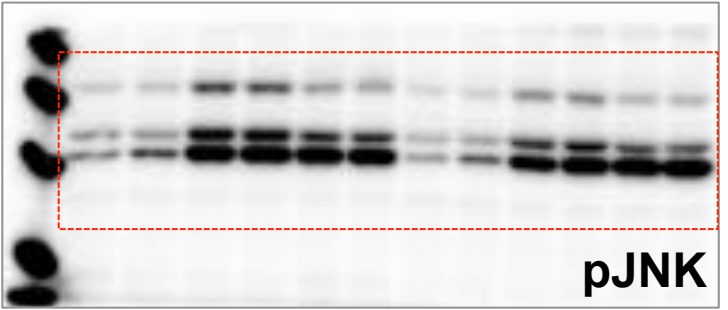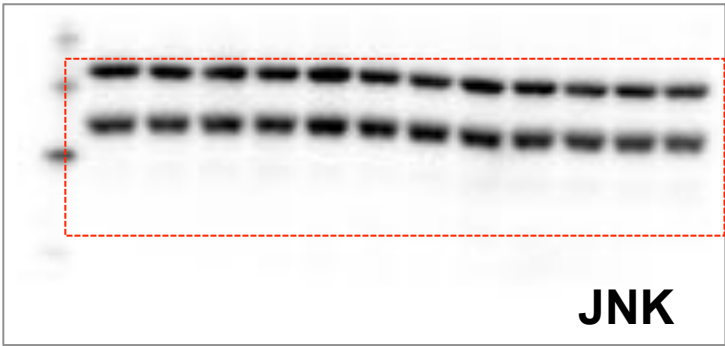

Figure 3 S1F

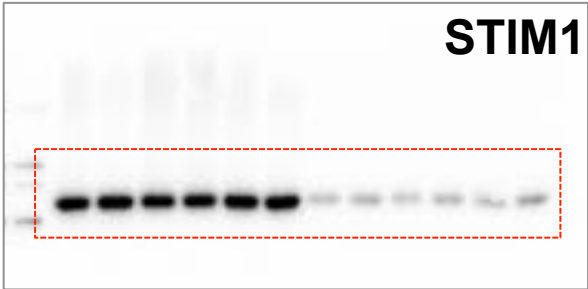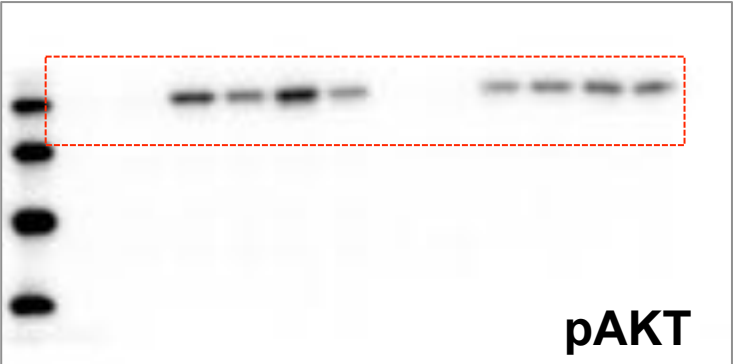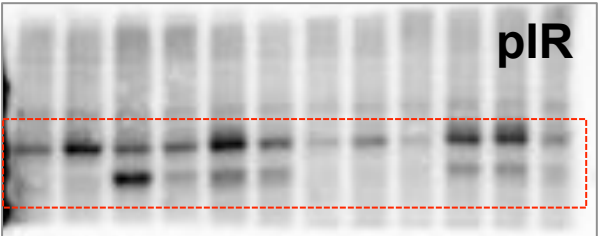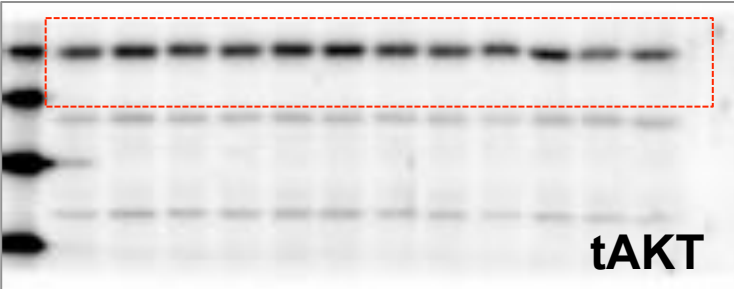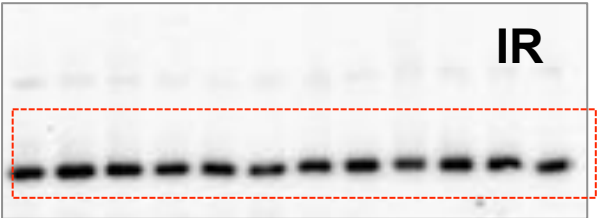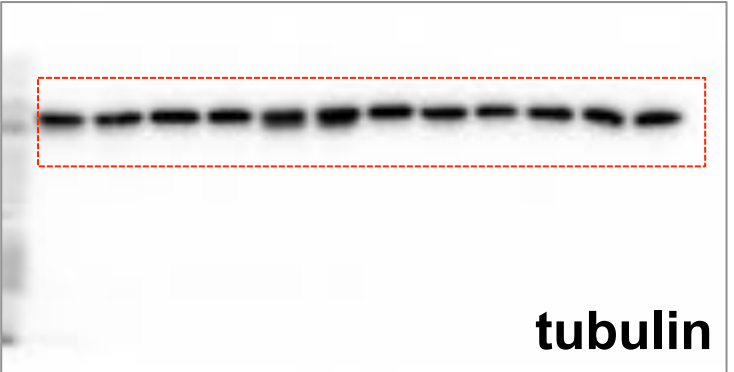

**Figure 3 S1G**

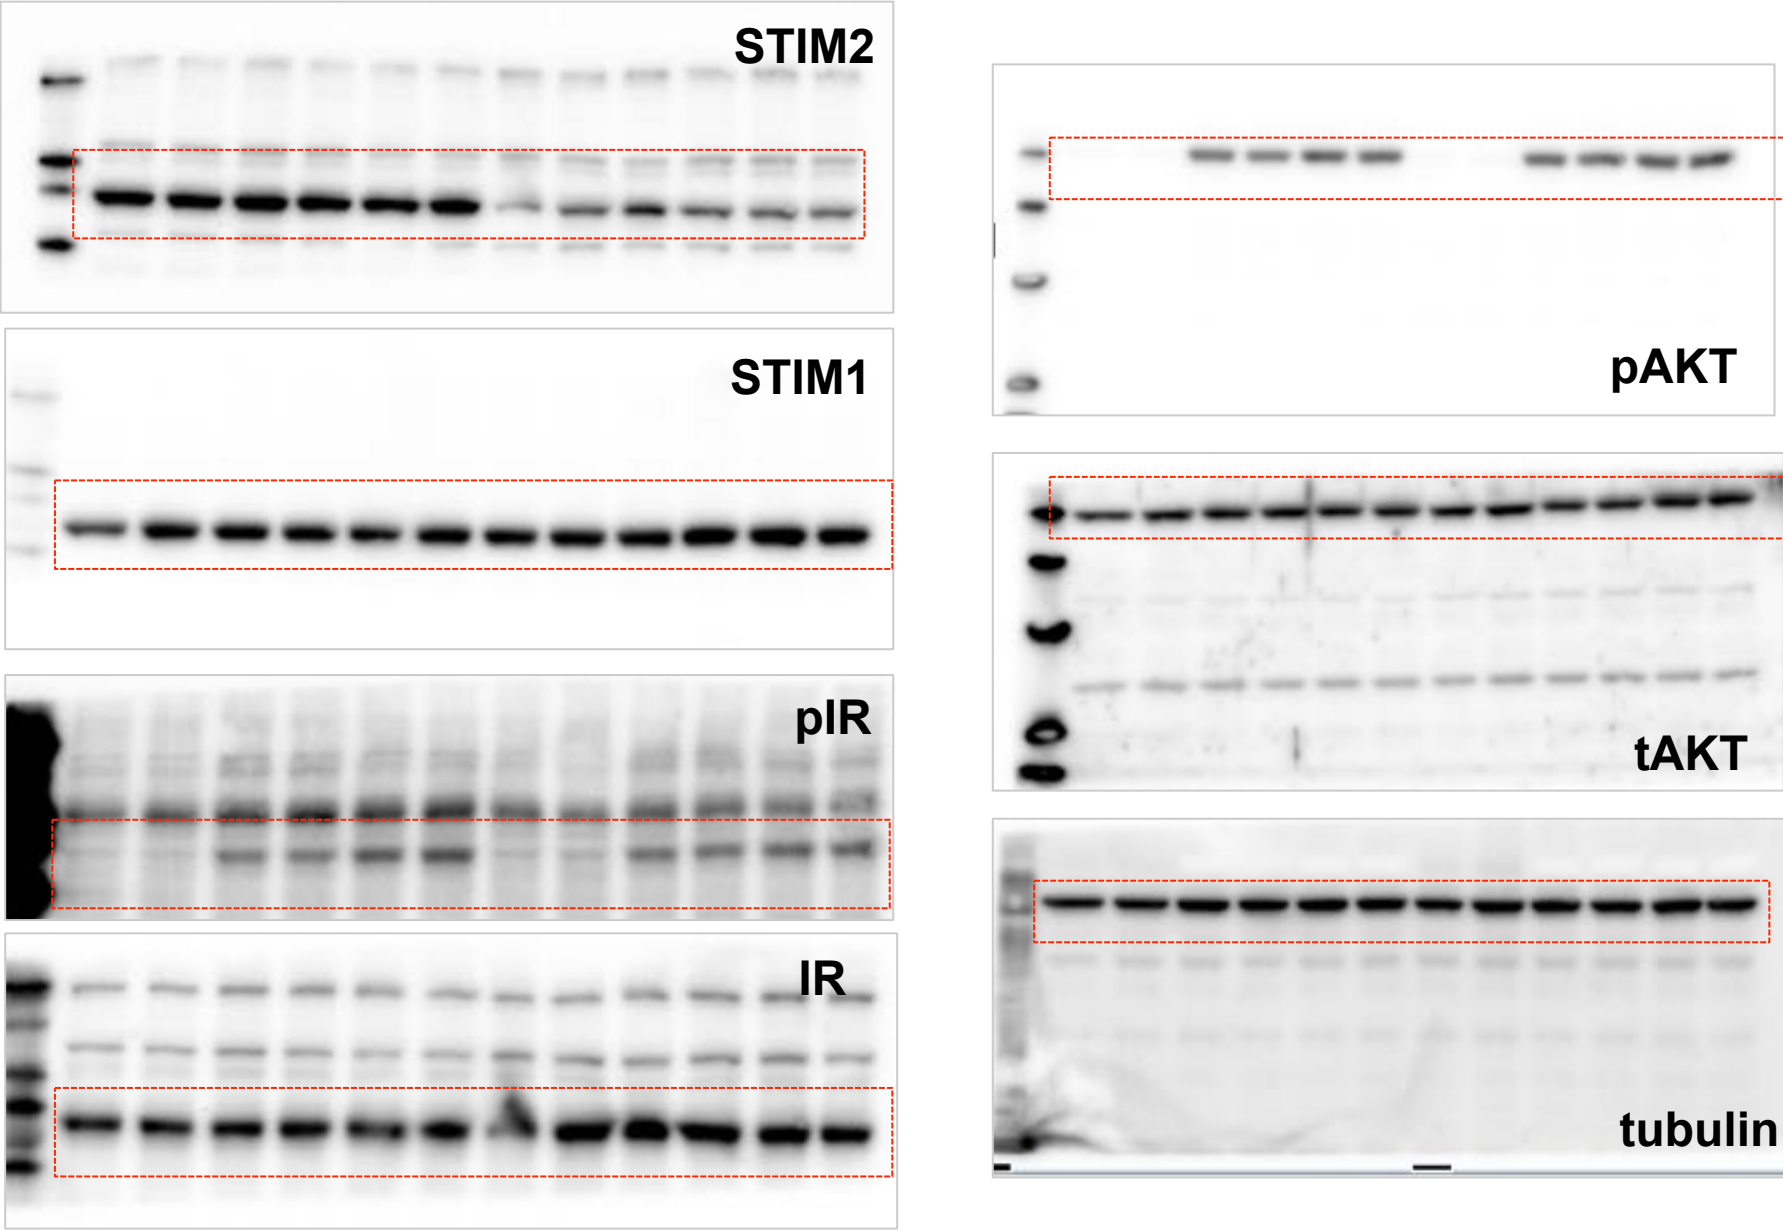

**Figure 3 S2A**

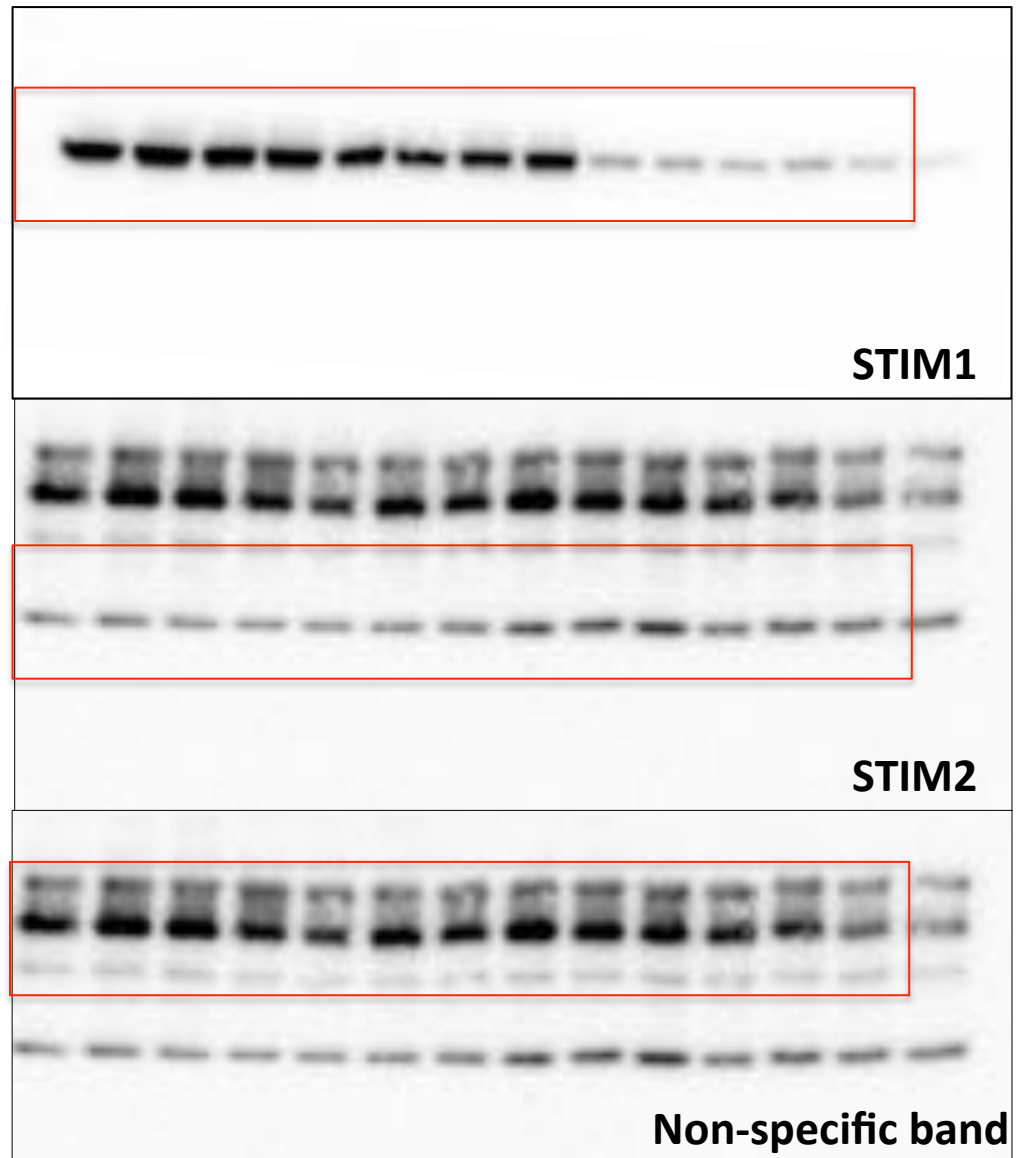

**Figure 3 S2D**

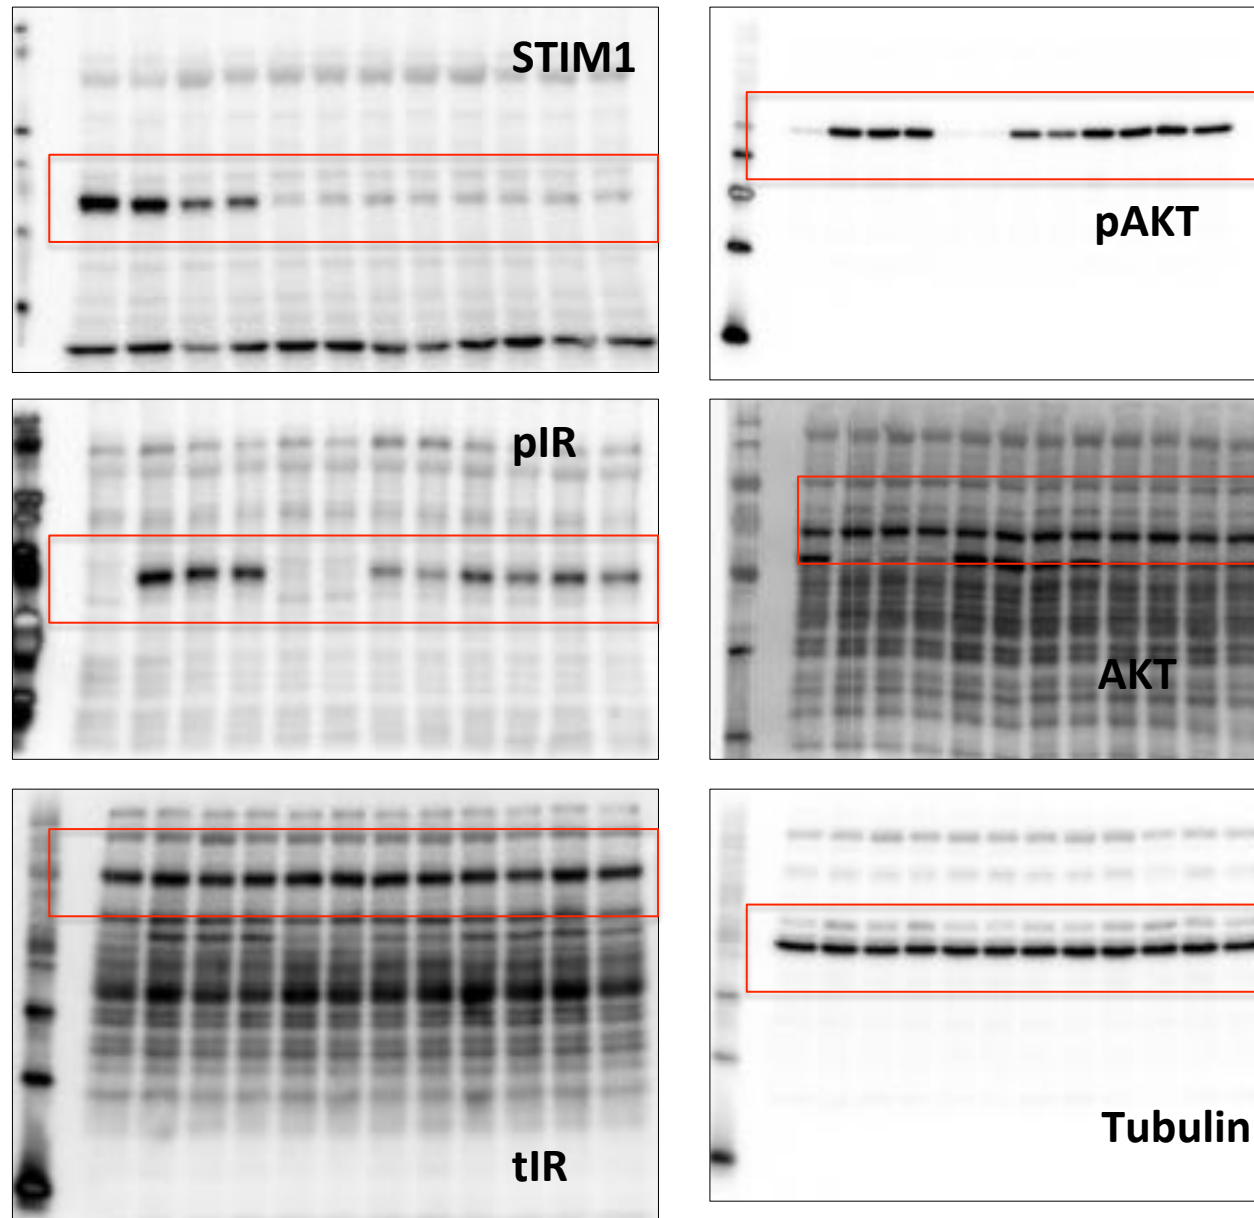



**Figure 3 S2G**

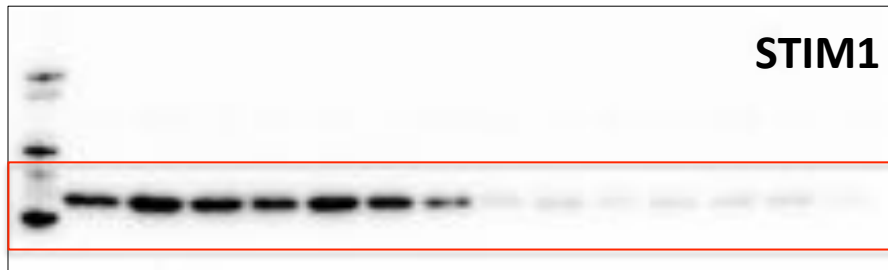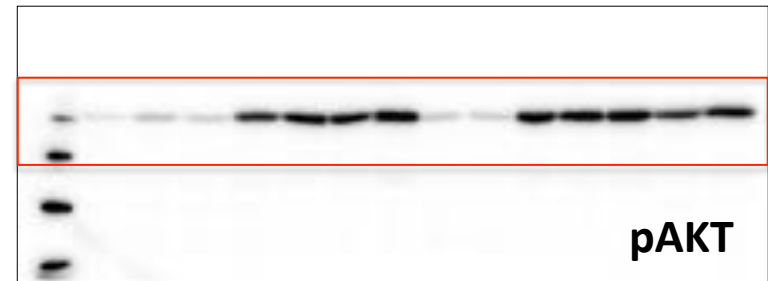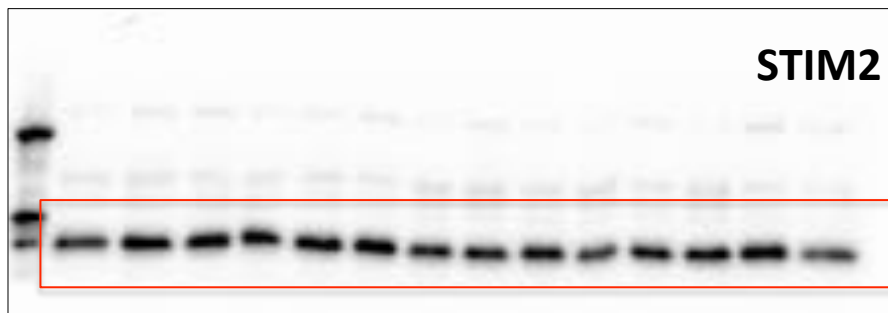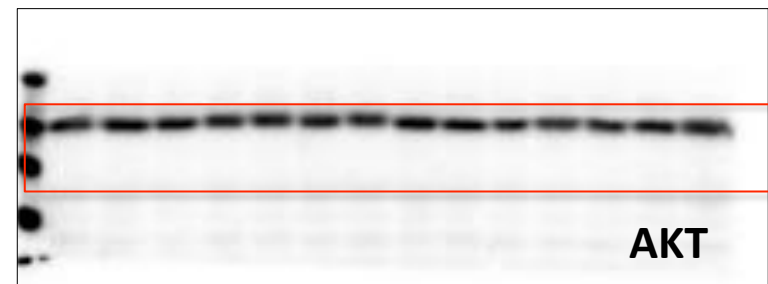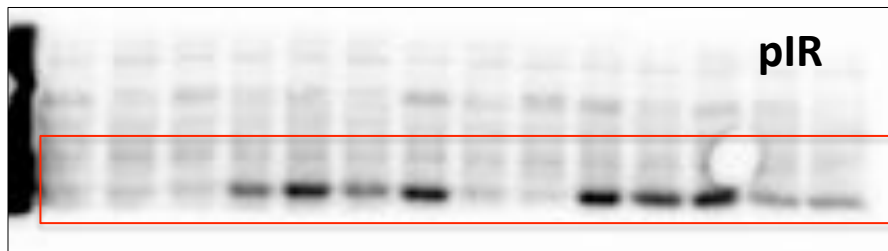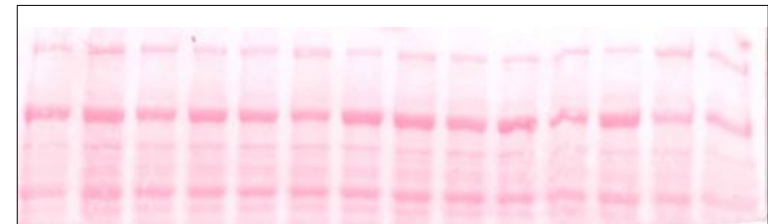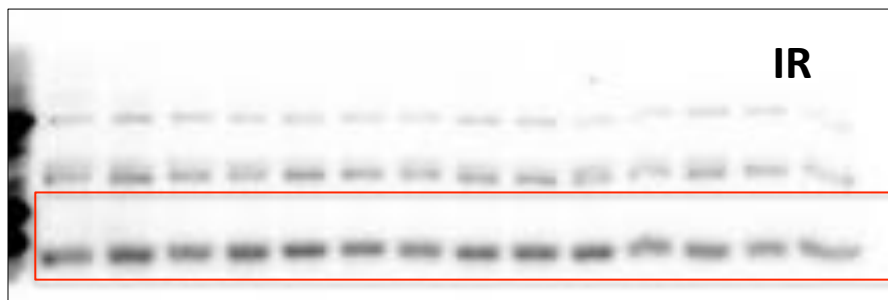

Figure 4A

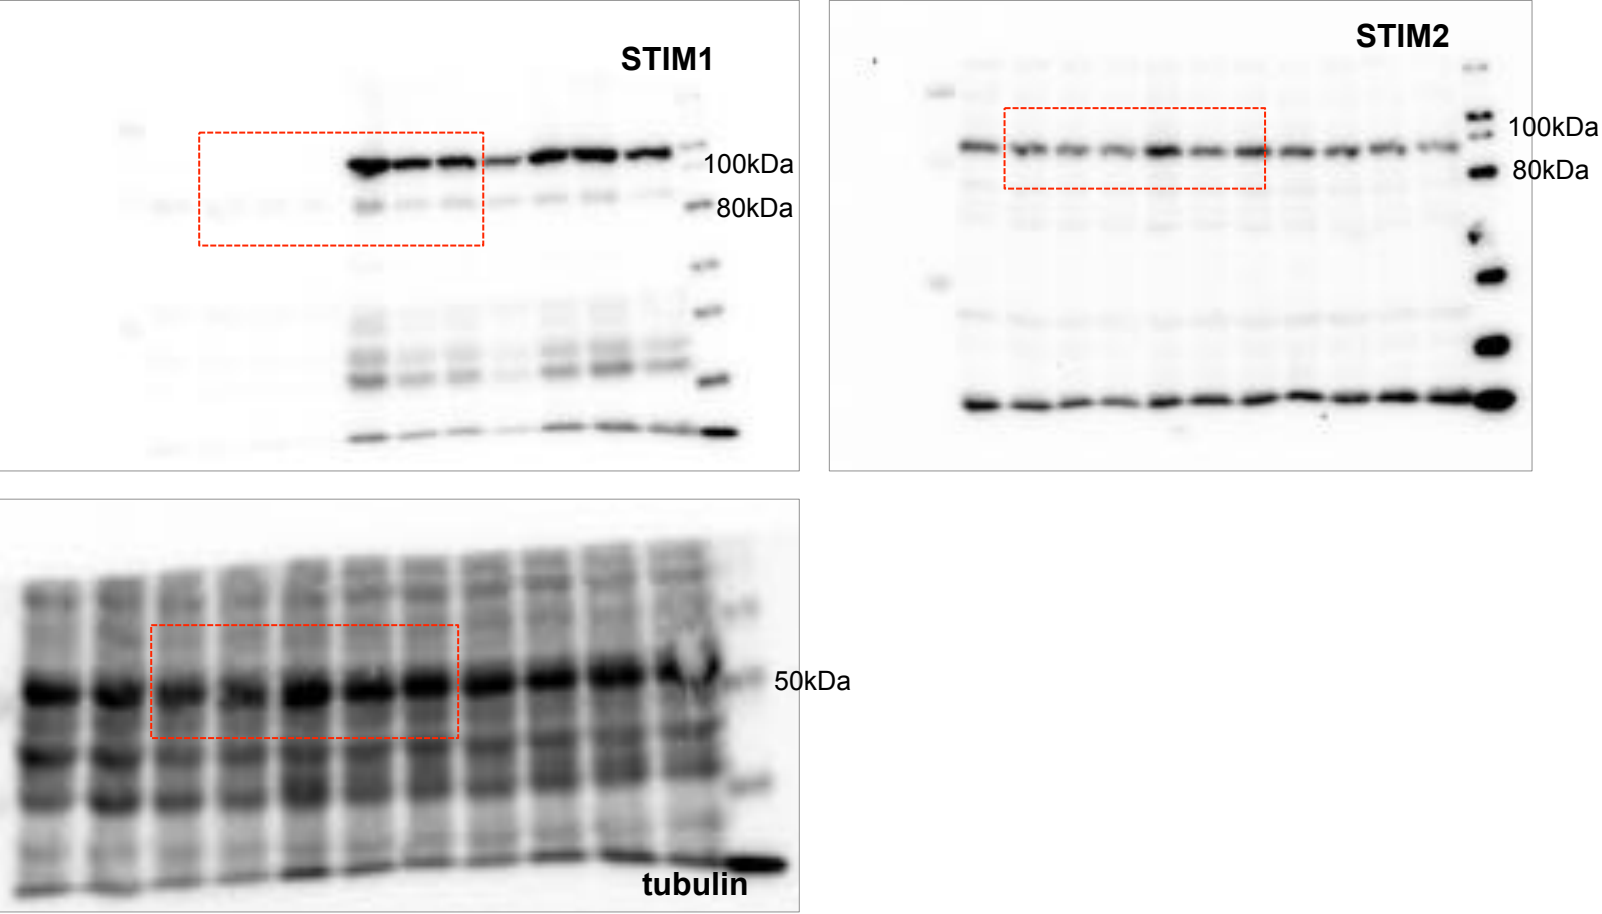

Figure 4F

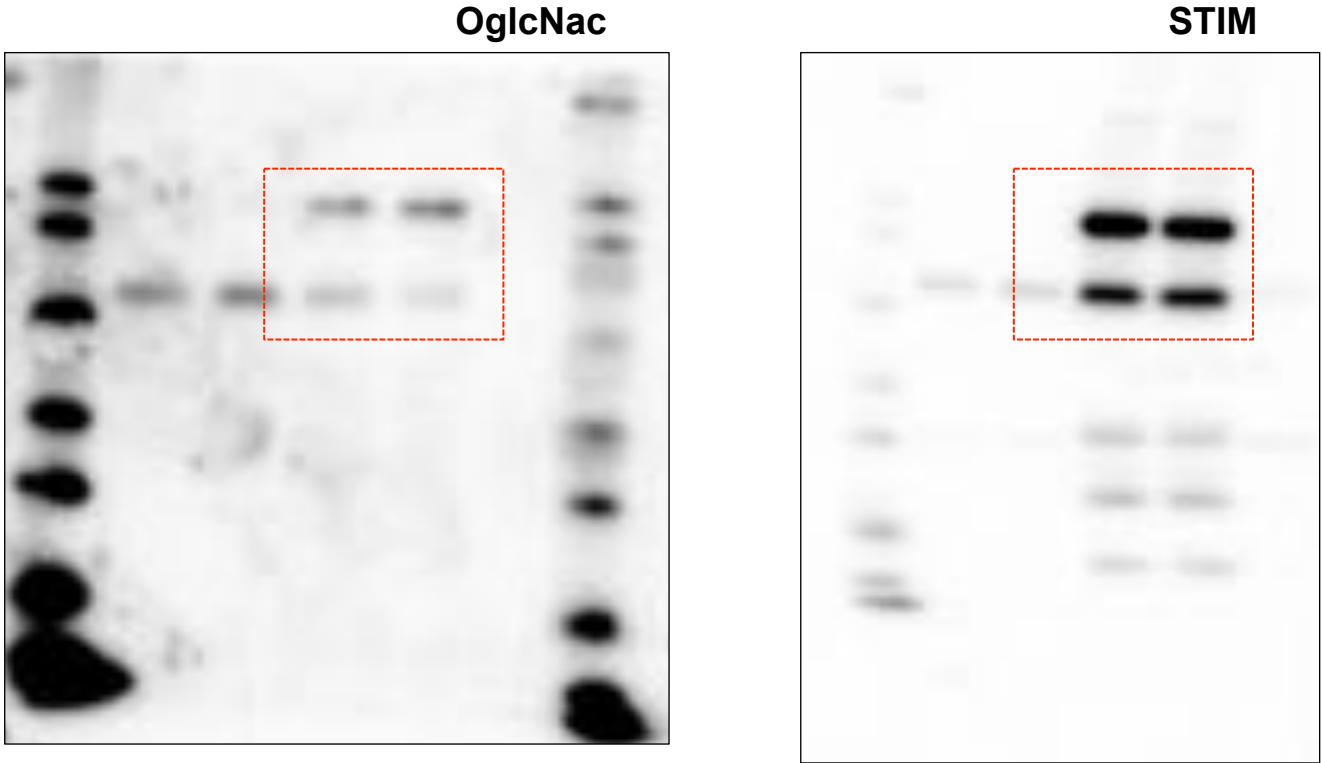

**Figure 5C**

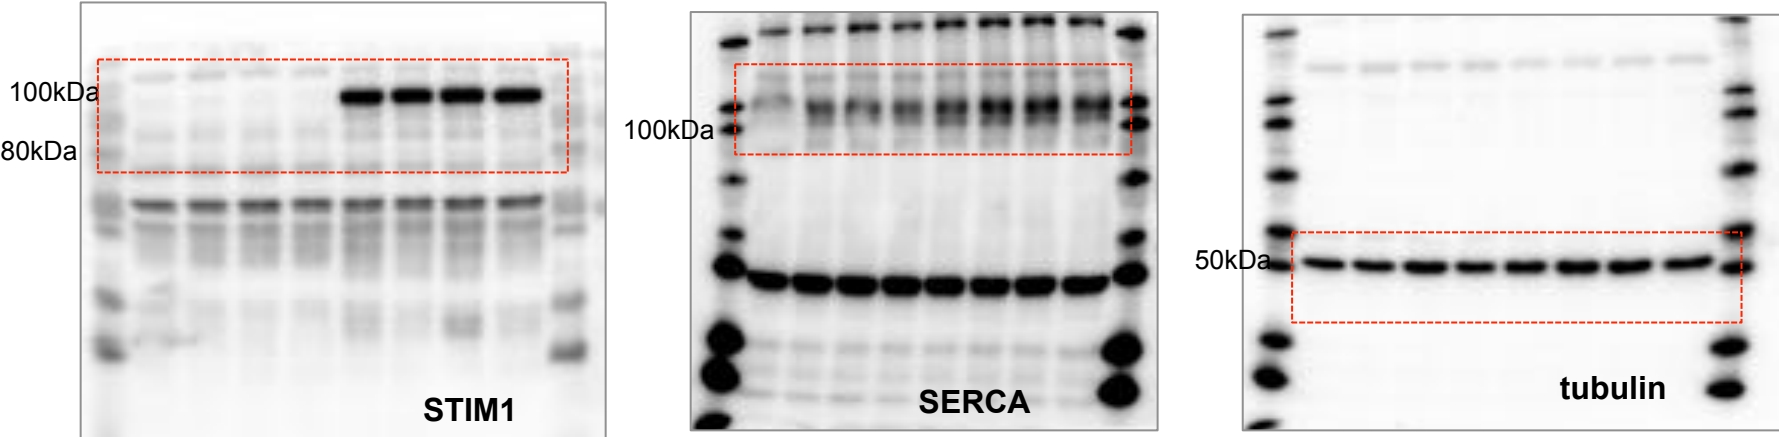

Figure 5E

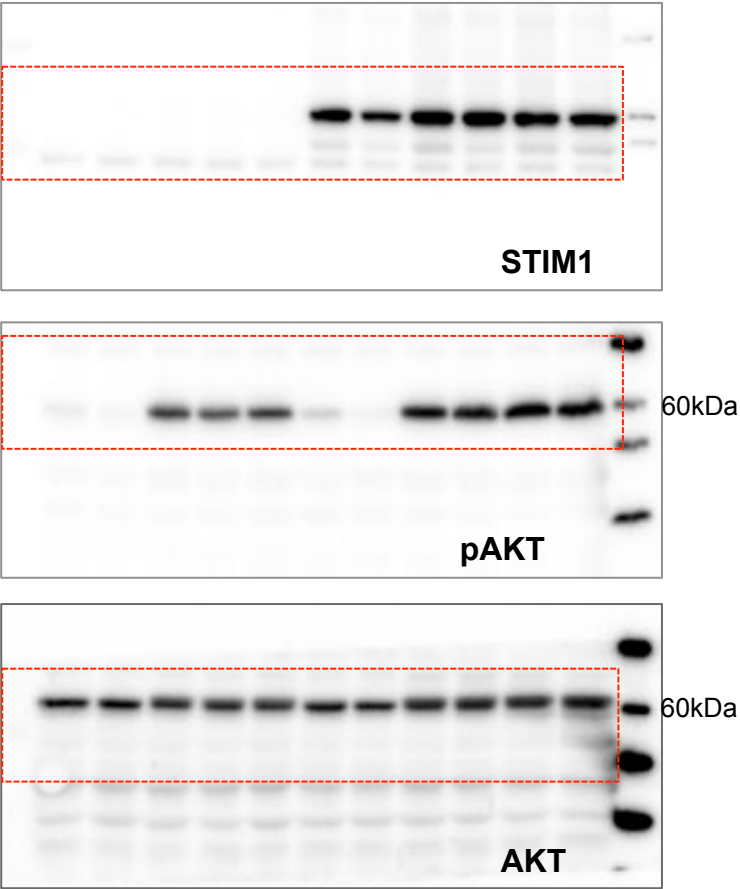

Supplement: supp [file elife-29968-supp-v1.zip]
