# Supplementary material for: Defective STIM-mediated store operated Ca2+ entry in hepatocytes leads to metabolic dysfunction in obesity
Source: eLife. 2017 Dec 15;6:e29968. doi: 10.7554/eLife.29968 (PMC5777820; doi:10.7554/eLife.29968)
Supplement: Figure 1—source data 1. [file elife-29968-fig1-data1.xlsx]

## Sheet: Figure 1A
	Left Panel						Right Panel
	Representative traces of cytosolic calcium measurements							Tg response		SOCE response
	Time (sec)	WT	ob/ob	WT+2APB	ob/ob+2APB		Cell number	WT	ob/ob	WT	ob/ob
	0	1.02904	1.02665	1.00466	1.01252		1	1.95784	1.43254	1.99107	1.81807
	5	1.02265	1.02204	1.00164	1.00952		2	2.0377	1.18084	1.52011	1.82091
	10	1.01392	1.01646	0.99883	1.01228		3	1.49321	1.46192	1.4629	1.8364
	15	1.00642	1.0059	1.0016	1.00937		4	1.49268	1.05384	1.55247	2.72514
	20	0.99256	0.998915	0.997471	1.00869		5	1.65069	1.0543	1.52522	1.82152
	25	0.994437	0.999382	0.998139	1.00164		6	1.43096	1.3941	1.4777	3.44752
	30	0.98923	0.990882	0.99269	0.999978		7	1.61901	1.05639	1.51499	2.85519
	35	0.990067	0.984434	0.991428	1.00024		8	1.43065	1.1355	1.5431	2.57905
	40	0.997346	0.991157	0.990913	0.997201		9	1.59327	1.29748	1.78116	2.06555
	45	1.0031	1.007	0.992864	0.997859		10	1.60448	1.17591	2.35357	2.03231
	50	1.00556	1.00885	0.994141	1.00134		11	1.77585	1.07308	2.41434	2.15406
	55	1.00676	1.02591	0.993928	1.00413		12	1.61891	1.27638	2.12657	2.51607
	60	1.01372	1.03422	0.998484	1.00586		13	1.93987	1.07763	2.29035	1.98559
	65	1.00422	1.03929	1.00538	0.996949		14	1.76092	1.10902	2.21952	2.14054
	70	1.01141	1.04688	1.00498	1.00231		15	1.69499	1.37299	2.29342	1.28861
	75	1.0131	1.04006	1.00839	1.01216		16	1.77362	1.09182	2.13509	2.01876
	80	1.01645	1.03994	1.01384	1.03462		17	1.54204	1.06783	1.86787	2.31361
	85	1.01381	1.02524	1.01733	1.05197		18	1.5675	1.11585	1.97783	2.07825
	90	1.01938	1.02094	1.01392	1.07227		19	1.33683	1.12987	1.99764	1.39922
	95	1.03539	1.0154	1.01598	1.07333		20	1.36572	1.16156	2.60952	1.05638
	100	1.02691	1.00013	1.01363	1.07979		21	1.51756	1.13321	1.99014	1.44015
	105	1.03014	0.99802	1.02042	1.09014		22	1.62802	1.2023	2.13635	1.45257
	110	1.03391	1.00027	1.02467	1.09676		23	1.77799	1.13507	2.453	1.17256
	115	1.01923	1.00103	1.02605	1.10135		24	1.65514	1.10074	1.65331	1.25709
	120	1.02253	1.00369	1.02433	1.09805		25	1.55259	1.18494	1.69947	1.97679
	125	1.02719	1.01608	1.01747	1.08114		26	1.3264	1.13368	2.20983	2.33349
	130	1.03614	1.03414	1.0158	1.05883		27	1.65338	1.0971	2.34197	4.26302
	135	1.02848	1.04267	1.00972	1.03237		28	1.83579	1.26373	1.64841	1.44797
	140	1.03568	1.06465	0.999305	1.01902		29	1.54596	1.23282	1.61149	1.76331
	145	1.03661	1.07721	0.998642	1.00573		30	1.50742	1.24292	2.12213	1.72819
	150	1.04175	1.08743	0.990515	0.995005		31	1.27641	1.18249	2.45221	1.99211
	155	1.04665	1.07715	0.981222	0.983419		32	1.3295	1.03312	2.36631	1.95512
	160	1.05827	1.07116	0.980339	0.96625		33	1.29381	1.42325	2.13458	1.76479
	165	1.05584	1.05415	0.985804	0.942039		34	1.7235	1.18593	3.14356	1.73283
	170	1.04349	1.04832	0.994754	0.934685		35	1.42684	1.29348	1.74114	1.34681
	175	1.04356	1.0276	1.00063	0.938626		36	1.5106	1.44807	1.93834	1.58919
	180	1.03524	0.999858	1.00351	0.939288		37	1.1943	1.10049	2.12039	1.53068
	185	1.02963	0.986682	0.996524	0.936808		38	1.58394	1.09269	1.47821	1.85598
	190	1.04249	0.976514	0.989478	0.935931		39	1.46988	1.33177	1.5783	1.33738
	195	1.03806	0.969969	0.98304	0.926224		40	1.51426	1.34769	1.55772	1.20856
	200.001	1.03612	0.966765	0.980606	0.918618		41	1.5672	1.18096	1.58284	1.47953
	205.001	1.02687	0.964205	0.975806	0.911037		42	1.33521	1.24758	1.76334	1.71767
	210.001	1.026	0.967356	0.971589	0.90757		43	1.35072	1.10062	2.47099	1.47735
	215.001	1.02609	0.963132	0.969639	0.906771		44	1.32196	1.38644	1.81238	1.87079
	220.001	1.02222	0.943406	0.962097	0.90142		45	1.16398	1.27406	1.69399	1.55628
	225.001	1.02885	0.937141	0.957012	0.903581		46	1.6858	1.19261	1.70845	1.50378
	230.001	1.01885	0.933776	0.959766	0.905545		47	1.22142	1.31494	1.90264	2.04306
	235.001	1.00905	0.952195	0.960574	0.907776		48	1.74197	1.31752	1.5112	2.24994
	240.001	0.998192	0.961366	0.96186	0.917264		49	1.83427	1.10125	1.62799	1.73654
	245.001	0.997895	0.962933	0.962183	0.92237		50	1.28229	1.32237	1.58205	1.63175
	250.001	0.995581	0.971674	0.956413	0.921307		51	1.40551	1.34246	1.56084	1.79197
	255.001	0.973908	0.976903	0.949887	0.91764		52	1.41989	1.29987	1.62571	1.84856
	260.001	0.977904	0.978614	0.946317	0.918794		53	1.25765	1.33183	1.29058	1.44946
	265.001	0.985314	0.976975	0.897196	0.915573		54	1.49016	1.38363	1.74244	1.50173
	270.001	0.9951	0.955893	0.927192	0.915018		55	1.6025	1.16253	1.94048	1.68041
	275.001	1.01984	0.984255	0.970039	0.903104		56	1.23311	1.08004	1.56051	1.38718
	280.001	1.11395	1.00691	1.01152	0.893859		57	1.23145	1.22711	2.12	1.45148
	285.001	1.17659	1.03642	1.06147	0.910207		58	1.56258	1.32621	2.36326	1.615
	290.001	1.26836	1.07856	1.11973	0.944273		59	1.65261	1.16769	1.68911	1.53661
	295.001	1.34278	1.12904	1.18327	0.994011		60	1.67023	1.22985	1.42156	1.54105
	300.001	1.40086	1.17698	1.25908	1.05743		61	1.4431	1.29401	1.88004	1.57836
	305.001	1.45088	1.22822	1.33238	1.12191		62	1.63722	1.28722	1.7675	1.51667
	310.001	1.487	1.24623	1.39734	1.19364		63	1.48813	1.11826	2.35399	1.60515
	315.001	1.52335	1.26351	1.45349	1.24367		64	1.55987	1.34476	2.473	1.7503
	320.001	1.5231	1.26739	1.48249	1.28206		65	1.68196	1.41276	1.37675	1.64371
	325.001	1.49249	1.23863	1.49728	1.30115		66	1.60874	1.09434	1.61892	1.36878
	330.001	1.48693	1.21306	1.47327	1.31148		67	1.63792	1.12849	2.4499	1.30605
	335.001	1.46377	1.16053	1.42532	1.29489		68	2.10481	1.43671	2.18933	1.34713
	340.001	1.42254	1.11513	1.44392	1.26054		69	1.29094	1.06743	1.93659	1.20674
	345.001	1.40856	1.11689	1.42266	1.20069		70	1.30419	1.13293	1.53234	1.24186
	350.001	1.41291	1.09821	1.38271	1.14675		71	1.25319	1.30754	1.88915	1.47278
	355.001	1.37319	1.08813	1.34837	1.11249		72	1.20243	1.21736	2.15551	1.71357
	360.001	1.35659	1.08773	1.31204	1.08252		73	1.41301	1.27803	2.0051	2.17384
	365.001	1.32372	1.08517	1.27618	1.05873		74	1.357	1.30873	2.35805	2.01018
	370.001	1.29445	1.07519	1.24624	1.04472		75	1.23654	1.32671	2.24459	1.68352
	375.001	1.27521	1.06866	1.22578	1.0278		76	1.58189	1.29658	2.57542	1.68961
	380.001	1.26414	1.06878	1.20176	1.02062		77	1.27858	1.29284	2.60691	1.81056
	385.001	1.26688	1.0699	1.18366	1.00235		78	1.38069	1.44775	1.35589	1.98219
	390.001	1.25251	1.06206	1.1615	0.993246		79	1.40294	1.5645	1.71527	2.07872
	395.001	1.24314	1.04037	1.1381	0.978259		80	1.25267	1.41289	1.91711	2.28587
	400.001	1.23216	1.03441	1.11378	0.96837		81	1.35862	1.38633	1.78704	2.22501
	405.001	1.22083	1.00998	1.09293	0.953304		82	1.61888	1.16848	1.50576	1.67796
	410.001	1.19567	1.0022	1.07472	0.946438		83	1.36219	1.32506	1.67087	1.72128
	415.001	1.17188	0.989051	1.06476	0.93843		84	1.79939	1.3412	2.05147	1.84187
	420.001	1.13495	0.968613	1.0492	0.932659		85	1.79437	1.90294	1.70758	1.98235
	425.001	1.10137	0.955236	1.03788	0.928473		86	1.78035	1.46199	1.93159	1.945
	430.001	1.06126	0.945511	1.02068	0.926556		87	1.67652	1.42384	2.65722	1.84494
	435.002	1.03988	0.931206	0.999615	0.922024		88	1.45104	1.28432	1.89457	1.43739
	440.002	1.00963	0.909996	0.984126	0.91458		89	1.18989	1.35512	1.58309	1.58007
	445.002	0.991268	0.907991	0.976078	0.90634		90	1.3909	1.34769	2.39054	1.63475
	450.002	0.980756	0.907011	0.959648	0.903588		91	1.58672	1.27541	2.01642	1.63519
	455.002	0.975545	0.904509	0.945781	0.893128		92	1.27463	1.13116	1.96568	1.51062
	460.003	0.967287	0.892176	0.931111	0.889613		93	1.28426	1.22615	3.25065	1.37515
	465.003	0.965503	0.891911	0.916545	0.883839		94	1.34459	1.24836	2.25947	1.46255
	470.003	0.957603	0.887258	0.908424	0.842542		95	1.45249	1.04179	1.9304	1.39625
	475.003	0.95396	0.879761	0.894303	0.869268		96	1.47053	1.21519	1.95551	2.24554
	480.003	0.935768	0.879281	0.887894	0.890075		97	1.22636	1.2442	1.72875	1.54826
	485.003	0.921471	0.871381	0.882634	0.912393		98	1.45824	1.25908	1.85216	1.20221
	490.004	0.905337	0.861834	0.874824	0.927409		99	1.56637	1.25718	2.52362	1.17263
	495.004	0.893921	0.85872	0.863222	0.938014		100	1.56218	1.10266	2.17885	1.4138
	500.004	0.859282	0.862336	0.850801	0.94236		101	1.46	1.15539	2.09306	1.50512
	505.004	0.833394	0.855252	0.842971	0.942503		102	1.42318	1.06028	2.25458	1.62993
	510.004	0.826297	0.834402	0.838411	0.940224		103	1.47276	1.30107	2.00808	1.67975
	515.004	0.838488	0.840338	0.835791	0.931562		104	2.32003	1.32783	2.09612	1.2456
	520.004	0.903712	0.850057	0.83172	0.915925		105	1.43296	1.22116	1.81285	1.19272
	525.004	0.98472	0.875528	0.826678	0.890324		106	1.34548	1.12375	1.55536	1.52976
	530.004	1.09804	0.898856	0.818226	0.864665		107	1.39898	1.28746	1.42657	1.99937
	535.004	1.25465	0.965891	0.811472	0.830725		108	1.32787	1.09167	2.32863	1.85462
	540.004	1.39194	1.03355	0.80701	0.79179		109	1.43269	1.17134	1.88615	2.01655
	545.004	1.55921	1.11765	0.802325	0.81983		110	1.45136	1.07767	1.65211	2.72194
	550.004	1.719	1.18398	0.796832	0.808288		111	1.57856	1.24588	1.71487	2.18345
	555.004	1.84249	1.24466	0.784038	0.806198		112	1.7072	1.30831	2.56907	1.89631
	560.005	1.9466	1.30227	0.77109	0.802068		113	1.30767	1.27972	4.06015	1.82686
	565.005	1.98772	1.33906	0.755803	0.797957		114	1.45604	1.25681	1.95947	1.97158
	570.005	1.98627	1.38626	0.747915	0.793927		115	1.46741	1.31505	2.15491	1.81165
	575.005	1.95982	1.40031	0.744678	0.792512		116	1.45385	1.31931	2.04382	1.63996
	580.005	1.94836	1.41692	0.739003	0.789		117	1.34593	1.19724	2.02209	1.72187
	585.005	1.90607	1.44371	0.73641	0.786087		118	1.46305	1.23322	2.10906	1.97394
	590.005	1.9111	1.44722	0.73089	0.784473		119	1.16294	1.11321	1.93398	1.3564
	595.005	1.87166	1.44532	0.724614	0.78234		120	1.26203	1.10551	1.83925	1.39245
	600.005	1.85971	1.42593	0.721459	0.780368		121	1.45149	1.05911	2.22243	1.20127
	605.005	1.8534	1.4362	0.718892	0.778644		122	1.52197	1.12697	2.53519	1.23218
	610.005	1.83641	1.42013	0.719775	0.777908		123	1.46763	1.05818	2.11989	1.2585
	615.005	1.85895	1.41742	0.721254	0.777411		124	1.66066	1.1406	2.22998	1.34767
	620.005	1.84652	1.38369	0.719942	0.776511		125	2.46619	1.15426	2.50583	1.17851
	625.005	1.78793	1.38489	0.715597	0.779907		126	2.01491	1.12526	1.70429	1.136
	630.005	1.74459	1.37836	0.711846	0.779852		127	2.13905	1.17859	1.62442	1.24432
	635.005	1.72567	1.36521	0.7106	0.776614		128	1.57227	1.28696	2.02454	1.34391
	640.005	1.73069	1.37935	0.70862	0.77274		129	1.80672	1.2797	2.46337	1.30276
	645.005	1.74315	1.3835	0.703973	0.769585		130	1.19247	1.53243	2.27201	1.9316
	650.005	1.76841	1.3935	0.701974	0.766128		131	1.62937	1.26684	2.02367	1.59602
	655.005	1.7468	1.39041	0.699511	0.764413		132	1.53295	1.4607	1.99427	1.68527
	660.005	1.76228	1.36625	0.69527	0.763603		133	1.59294	1.2116	2.19408	1.61065
	665.005	1.70657	1.36298	0.691113	0.764605		134	1.41834	1.21997	3.63596	1.59769
	670.005	1.67734	1.3504	0.688958	0.763704		135	1.47223	1.04277	2.29784	1.40133
	675.005	1.63781	1.34769	0.685139	0.764276		136	1.50402	1.2804	2.9251	1.88592
	680.005	1.61923	1.34613	0.682602	0.76411		137	2.00919	1.15714	2.89298	1.73226
	685.005	1.58986	1.34784	0.680952	0.766713		138	1.98826	1.16485	2.62712	1.93258
	690.005	1.52754	1.35535	0.677462	0.765057		139	1.52527	1.10289	1.70792	1.30346
	695.005	1.45161	1.37683	0.673847	0.761354		140	1.71921	1.13107	2.3138	1.39554
	700.005	1.42053	1.37376	0.668037	0.757438		141	1.54119	1.56893	1.38527	1.4528
	705.005	1.42898	1.37107	0.670241	0.750155		142	1.83544	1.36398	1.75136	1.56449
	710.005	1.42562	1.34732	0.668157	0.746057		143	1.61147	1.2538	1.7142	1.78907
	715.005	1.44555	1.34217	0.665085	0.742909		144	1.72674	1.09831	1.78172	1.91503
	720.005	1.44335	1.31906	0.666376	0.737906		145	1.62117	1.33615	1.61706	1.56576
	725.005	1.41041	1.311	0.665007	0.732922		146	1.6351	1.24336	1.9281	1.69268
	730.005	1.40246	1.2917	0.662713	0.728776		147	1.30631	1.08804	1.67868	1.78497
	735.005	1.3929	1.31184	0.663915	0.728307		148	1.35778	1.11857	1.5809	1.50162
	740.005	1.37764	1.31762	0.664059	0.726252		149	1.60991	1.33221	1.6962	1.4987
	745.005	1.39242	1.31753	0.662305	0.725808		150	1.80386	1.5203	1.28295	1.93521
	750.005	1.42158	1.32165	0.658731	0.729189		151	1.49858	1.43114	1.9046	2.04982
	755.005	1.43449	1.32412	0.655221	0.731586		152	1.36166	1.2531	2.09577	1.78587
	760.005	1.43643	1.3406	0.651262	0.730406		153	1.57351	1.11551	2.17093	2.08933
	765.005	1.4211	1.33839	0.649527	0.728622		154	1.67552	1.05584	2.03411	1.92233
	770.005	1.43431	1.33479	0.647611	0.730523		155	1.51361	1.1196	1.7182	1.76544
	775.005	1.44518	1.32579	0.650501	0.726668		156	1.47801	1.33357	2.15168	1.61651
	780.005	1.46116	1.30764	0.648301	0.732589		157	1.54049	1.404	2.81006	1.61499
	785.005	1.49025	1.31603	0.645281	0.738521		158	1.74343	1.38341	2.19717	1.99841
	790.005	1.4789	1.30566	0.642828	0.742061		159	1.49551	1.34343	2.48973	2.4928
	795.005	1.4485		0.640112	0.742504		160	1.36773	1.29324	1.99753	1.27845
	800.005	1.44003		0.636615	0.740121		161		1.2279	1.56711	1.40819
	805.005	1.43238		0.637933	0.739377		162		1.05366	1.98704	1.35125
	810.005	1.38011		0.636567	0.736025		163		1.17246	2.29219	1.30001
	815.005	1.37473		0.636138	0.735305		164		1.2764	2.22125	2.10845
	820.005	1.368		0.635949	0.737576		165		1.20766	2.20038	1.95695
	825.005	1.35395		0.636699	0.734579		166		1.28282	2.24456	1.55325
	830.005	1.33644		0.63835	0.726582		167		1.27691	2.07777	1.9149
	835.005	1.31213		0.64026	0.728301		168		1.20728	2.14274	1.38649
	840.005	1.32688		0.641946	0.732532		169		1.17724	2.10103	1.38534
	845.005	1.3357		0.643114	0.736291		170		1.20598	2.21112	1.24238
	850.005	1.35645		0.640957	0.744254		171		1.34804	2.32498	1.28784
	855.005	1.37156		0.638137	0.74055		172		1.31419	2.58428	1.57184
	860.005	1.37336		0.635554	0.751651		173		1.35086	2.43011	1.89558
	865.005	1.38415		0.632599	0.762817		174		1.49616	2.54765	1.59021
	870.005	1.39794		0.62877	0.771934		175		1.36137	2.50302	1.60732
	875.005	1.39872		0.627185	0.781025		176		1.56406	2.00517	1.35012
	880.005	1.39796		0.62481	0.788741		177		1.47753	2.41615	1.3612
	885.005	1.41937		0.623192	0.794722		178		1.08184	2.26188	1.59858
	890.005	1.43655		0.62069	0.798842		179		1.25001	2.11545	1.47798
	895.005	1.43083		0.618248	0.797773		180		1.17562	2.73214	1.26587
	900.005	1.41453		0.615355	0.789154		181		1.06174	2.57141	1.39606
	905.005	1.39925		0.612537	0.790124		182		1.34071	2.38124	1.70827
	910.005	1.39392		0.609768	0.784861		183		1.28225	1.38174	1.75987
	915.005	1.37271		0.605743	0.77647		184		1.24066	2.639	1.59255
	920.005	1.35412		0.600005	0.76421		185		1.13837	2.53466	1.77524
	925.005	1.34943		0.596513	0.752287		186		1.15632	2.27714	1.66105
	930.005	1.3569		0.596194	0.758621		187		1.27982	2.67401	1.54913
	935.005	1.36324		0.5971	0.75828		188		1.30322	2.21988	1.66519
	940.005	1.36533		0.599342	0.756401		189		1.39638	2.80984	1.99669
	945.005	1.36923		0.602568	0.755548		190		1.52831	2.71151	2.232
	950.005	1.37832		0.607287	0.755315		191		1.21667	2.16063	2.19629
	955.005	1.38312		0.61267	0.753896		192		1.34454	2.19537	2.41411
	960.005	1.38287		0.617639	0.753559		193		1.17199	2.73129	1.52126
	965.005	1.37303		0.623084	0.751628		194		1.19181	2.12135	1.46186
							195		1.17139	1.97536	1.68269
							196		1.0862	2.75893	1.71659
							197		1.59483	1.76823	1.41028
							198		1.54958	2.98266	1.71584
							199		1.60066	2.77063	1.78683
							200		1.55476	1.76941	1.90419
							201		1.10138	1.79713	1.58455
							202		1.22708	1.95385	1.64356
							203		1.17114	2.31126	1.76282
							204		1.17727	2.074	1.71683
							205		1.13363	2.16074	2.05835
							206		1.65903	3.13409	1.44957
							207		1.66082	2.26223	1.5528
							208		1.41356	2.51044	1.7493
							209		1.83965	2.60896	1.65935
							210		1.44027	2.48737	2.04858
							211		1.60434	1.81191	2.01971
							212		1.5096	2.11996	1.94469
							213		1.97608	2.43674	2.33982
							214		1.80252	1.83474	2.13252
							215		1.12763	1.70244	2.18286
							216		1.20274	1.82937	2.00611
							217		1.15045	1.98148	1.56458
							218		1.46691	2.38862	1.53078
							219		1.16276	2.13205	1.32065
							220		1.05279	1.82633	1.59673
							221		1.51577	1.76378	1.06894
							222		1.63234	1.87298	1.13442
							223		1.7329	2.31392	1.68732
							224		1.75682	2.05262	1.70097
							225		1.25192	2.49707	1.60552
							226		1.08106	1.83474	1.56726
							227		1.1767	2.15339	1.52062
							228		1.80032	2.07249	2.19214
							229		1.06454	1.93981	2.38914
							230		1.07291	3.06122	2.59162
							231		1.51076	2.27439	1.32176
							232		1.45266	1.73912	1.67161
							233		1.60089	1.51731	1.50834
							234		1.16	1.50044	1.88479
							235		1.1311		1.7049
							236		1.50597		1.61097
							237		1.54341		1.28518
							238		1.65812		2.50231
							239		1.3575		1.24318
							240		1.95142		1.46738
							241		1.476		1.43191
							242		1.63348		1.49455
							243		1.48662		1.18497
							244		1.16969		1.74816
							245		1.21717		2.14782
							246		1.13618		1.82955
							247		1.31852		1.22876
							248		1.04093		2.07248
							249		1.18836		1.47844
							250		1.1626		1.37074
							251				1.83745
							252				1.87918
							253				2.6221
							254				1.70924
							255				1.33555
							256				1.57332
							257				1.18381
							258				1.82431
							259				1.25726
							260				1.35202
							261				1.43438
							262				1.97963
							263				3.72751
							264				2.14297
							265				1.4411
							266				1.70847
							267				1.43649
							268				1.24717
							269				1.41671
							270				1.18187
							271				1.47039
							272				1.74483
							273				1.8896
							274				1.67483
							275				1.731
							276				1.49102
							277				1.71116
							278				2.35711
							279				1.32732
							280				1.46791
							281				1.39332
							282				2.00652
							283				1.97827
							284				1.02863
							285				2.20239
							286				1.71444
							287				1.95424
							288				1.23102
							289				1.62215
							290				2.17667
							291				1.90361
							292				1.90321
							293				1.56099
							294				1.21626
							295				1.20624
							296				2.11035
							297				1.49214
							298				1.98416
							299				1.31261
							300				2.22945
							301				1.81334
							302				2.52313
							303				1.77642
							Average	1.53161	1.27942	2.07446	1.71299
							SD	0.22225	0.18035	0.424677	0.402825
							SE	0.0175704	0.0114064	0.027762	0.0231417
							N	160	250	234	303
							Unpaired t test between WT and ob/ob			Unpaired t test between WT and ob/ob
							P value	*	p<0.0001	P value	*p<0.0001
										s

## Sheet: Figure 1B
		Western Blot quantification A.U.
		STIM1		STIM2		tubulin		ORAI1		tubulin Orai1
		Wt	ob/ob	Wt	ob/ob	Wt	ob/ob	Wt	ob/ob	Wt	ob/ob
	1	7454.4	8278.23	6849.5	5477.2	8942.2	9530.62	11648.6	10678	9336.05	8621.1
	2	8090.81	9575.69	9570.33	4839.79	8047.33	7486.91	11010.5	13678.3	9981.47	8990.28
	3	8431.69	8246.74	7154.5	6175.96	9915.03	6372.08	10377.7	11526.9	10037.1	10587.4
	4	7915.1	7768.45	6629.2	5732.96	10881.1	7423.08
		Western Blot quantification normalized by tubulin A.U.
		STIM1		STIM2		ORAI1
		Wt	ob/ob	Wt	ob/ob	Wt	ob/ob
	1	0.83362	0.868593	0.765974	0.574696	1.04404	0.904569
	2	1.0054	1.27899	1.18926	0.646433	1.24035	1.2008
	3	0.850395	1.2942	0.721581	0.969222	1.01231	1.66153
	4	0.727419	1.04653	0.609241	0.772315
	Average	0.854209	1.12208	0.821513	0.740667	1.0989	1.25563
		Western Blot quantification normalized by control
		STIM1		STIM2		ORAI1
		Wt	ob/ob	Wt	ob/ob	Wt	ob/ob
	1	0.980729	1.02187	0.934115	0.700848	1.00004	0.866446
	2	1.18283	1.50469	1.45031	0.788333	1.18807	1.15019
	3	1.00046	1.52259	0.879977	1.18198	0.969642	1.5915
	4	0.855787	1.23121	0.742977	0.941848
	Average	1.00495	1.32009	1.00184	0.903252	1.05259	1.20271
	SD	0.13478	0.239386	0.309609	0.210833	0.118315	0.365371
	SE	0.06739	0.119693	0.154805	0.105416	0.0683089	0.210947
	N	4	4	4	4	3	3

## Sheet: Figure 1E
	Quantification of puncta number by field
		Bottom		Middle
		Wt	ob/ob	Wt	ob/ob
	1	55	225	23	111
	2	177	379	51	278
	3	158	209	41	271
	4	196	456	27	81
	5	151		58	252
	6			66
	Average	147.4	317.25	44.3333	198.6
	SD	54.5463	120.129	17.1309	94.7381
	SE	24.3939	60.0644	6.99365	42.3681
	N	5	4	6	5
	Unpaired t test between WT and ob/ob			Unpaired t test between WT and ob/ob
	P value		* p=0.0246	P value	# p=0.0033

## Sheet: Figure 1F
	Quantification of pixel intensity in a defined area of the middle crossection
		Wt			ob/ob
		Time (min) of Tg treatment			Time (min) of Tg treatment
		0	10	30	0	10	30
	1	0	82	1788	674	3923	796
	2	452	2782	119	1846	3923	2985
	3	133	1149	293	2515	4107	2486
	4	56	883	2966	1701	600	3853
	5			734		2203	769
	6			2909		1137	756
	7			1663			827
	8			2419
	9			3052
	Average	160.25	1224	1771.44	1684	2648.83	1781.71
	SD	201.997	1133.35	1161.08	760.963	1552.76	1303.52
	SE	100.999	566.674	387.026	380.481	633.913	492.683
	N	4	4	9	4	6	7
		Unpaired t test between:		p-value
		WT NT	WT TG 10min	0.1141
		WT NT	WT TG 30min	0.0209	*
		WT NT	ob/ob NT	0.0083	#
		ob/ob NT	ob/ob TG 10min	0.2879
		ob/ob NT	ob/ob TG 30min	0.8953

## Sheet: Figure 1G
	Representative plots of the pixel intensities profile across a defined region on the cell
	Lean				ob/ob
	Distance(pixels)	NT	TG 10min	TG 30min	Distance(pixels)	NT	TG 10min	TG 30min
	0	362.857	181.643	823.643	0	150.923	1776.62	322.308
	1	268	289.5	900.214	1	109.538	1058.38	331.308
	2	421.357	242.286	776.357	2	77.077	626.769	301.692
	3	717.071	247.857	663.214	3	166.923	452.538	339.769
	4	949.786	278.929	725.357	4	166.769	464.692	634.077
	5	912.643	230.143	775.5	5	148.692	937.308	705.769
	6	465.929	143.5	794.429	6	139.846	1634.08	878.615
	7	574.143	187.071	713.5	7	160.385	1808.69	949.077
	8	499.786	314.286	507	8	199.846	2279.61	946
	9	765.786	330.786	332.071	9	319.231	2843.61	709.692
	10	934.643	360.429	267.214	10	361.385	2868.85	439.077
	11	1132.57	304.5	267.143	11	172.231	2139.69	277.538
	12	1000.29	317.929	461.357	12	136.923	2037.46	351.154
	13	824.071	304	697.571	13	191.154	2118.15	801.615
	14	945.929	312.286	866.857	14	270.615	1662.77	1761.38
	15	1095.07	221.5	980.643	15	395.538	878.538	2732.08
	16	1121.86	268.929	1421.64	16	640	933.385	2927.46
	17	1310.36	208.429	2727.43	17	605.308	1115.46	2209.39
	18	1745.86	197.643	4189.86	18	756	810.846	1458.31
	19	2033.14	282.143	4805	19	1450.62	465.923	1264.31
	20	1661.14	258.286	4781.57	20	1922.62	347.692	1447.08
	21	1256.57	251.571	4043.07	21	1241.54	494.231	1027.54
	22	1001.29	282.286	3114.14	22	490.308	629.385	888.615
	23	1110.14	417.714	2568.43	23	445.769	666.231	1079.62
	24	1726.93	681.357	2071.64	24	338.231	621.692	1344.92
	25	1958.29	827	1799.57	25	342	642.154	1480.46
	26	1968.93	1083.29	1282.29	26	520.385	685.769	1526.08
	27	1664.36	1229.86	795.143	27	774.231	845.154	1747.23
	28	1232.21	1038	478.5	28	974	883.385	1607
	29	1076.86	743.214	286.5	29	1464.23	679.846	1109.46
	30	1206.14	433.714	351.643	30	1759.92	717.077	835.231
	31	1074.21	373.357	538.571	31	1741	903.769	813.462
	32	667.786	311.286	853.786	32	1296.62	1066.92	819.308
	33	626.643	270.929	817.714	33	1173.77	1011.38	869.692
	34	455.786	368.357	1007.86	34	1484.62	805.615	904.923
	35	468.643	410.5	1571.86	35	1315.38	878.385	950.538
	36	648.5	770.714	1854.64	36	1356.15	946.462	1132
	37	801.286	1122.86	1730.36	37	1888.23	848.923	1158.38
	38	770.5	1763.93	1069.5	38	2315.85	959.923	1136.23
	39	586.714	2316.07	499.429	39	2214.85	1111.38	1145
	40	290.929	2784.07	423.714	40	1375	1008.23	1025
	41	359.786	3234.21	519	41	641.923	848.308	667.308
	42	440.786	3095.14	514.714	42	558.231	1011.08	458.385
	43	544.071	2965.21	496	43	670.846	1036	531.231
	44	486.929	2766.07	383.143	44	820	842.615	853.846
	45	389.143	2264.21	319.143	45	917.846	957.769	965.077
	46	312.929	1886.71	371.429	46	1346.62	906.923	1100.85
	47	332.929	1938.57	462.143	47	1201.77	1028.15	1074.85
	48	445.286	1574.5	761.071	48	1287.92	1090.46	950.769
	49	571.071	1213.57	646.429	49	1567	820.308	1214.85
	50	717.714	852.714	608.143	50	2173.69	785.692	2213.23
	51	733	634.214	835.071	51	2332.15	889.462	3115.85
	52	627.143	612.071	658.214	52	1561.62	1212.77	3278.08
	53	741.571	620	385.5	53	1101.54	1500.38	3037.92
	54	737	524.429	536.286	54	1096	1321.15	2672.23
	55	634.857	435.071	605.929	55	1280.54	1093.62	2608.77
	56	571.714	362.429	583.857	56	1150.38	1001.38	2186.15
	57	417.929	262.071	645.5	57	1014.38	1030.85	1508.38
	58	414	316.714	483	58	1122.08	978.231	1580.54
	59	390.714	277.929	325.5	59	1556.08	1064.69	1810.77
	60	501	313	373.929	60	1496.77	1038.46	1683.08
	61	560.071	437.857	559.5	61	874.538	958.538	1499.23
	62	407.071	460.714	632.143	62	737.692	828.692	1433.08
	63	282.286	645	434.786	63	698.538	597.846	1434.31
	64	338.429	540.929	215	64	670.923	362.846	1486.31
	65	381.643	564.5	226.143	65	852.385	338.692	1152.23
	66	797.571	573.643	430.071	66	870.462	547.385	891.846
	67	816.714	622.5	452.786	67	865.538	916	583.077
	68	722.929	482.643	299.357	68	857.846	1073.31	470.615
	69	658.5	340	311	69	652.846	707.538	552.923
	70	654.571	343.643	257.5	70	358.846	514.846	679.538
	71	920	320.214	154.929	71	281.308	699.385	614.769
	72	762.286	351.286	127	72	242	728.231	534.923
	73	829.929	456.429	52.5	73	214.692	522.385	380.385
	74	774.571	409.929	76.786	74	159.231	723.385	247.846
	75	879	404.5	84.143	75	324.538	993.615	338.923
	76	835.929	357.357	112.929	76	656.615	977.231	287.462
	77	781.571	368.5	168.5	77	869.846	826.462	182
	78	902.786	389.143	120.071	78	909	856.538	171.231
	79	1046.43	408	133.786	79	483.385	1029.38	183.769
	80	619.786	372.357	103.857	80	239.692	1364.62	211
	81	664.214	649.429	48.429	81	411.846	1388.69	374
	82	841.643	930.214	16.429	82	613	1166.46	469.846
	83	1031.93	1131.21	103	83	727.385	900.538	794.923
	84	1207.29	1252.43	129	84	1282.85	802.462	1168.15
	85	1175.86	1088.93	125.214	85	1191.77	856.769	1453.85
	86	891.643	701	172.214	86	943.154	915.538	1697.08
	87	780.643	525.643	131.786	87	409	1127.77	2200
	88	808.357	522.857	120.714	88	321.231	1828.62	2353.77
	89	840.357	454.214	150	89	528.615	2672.08	1587.54
	90	648.786	367.286	94.357	90	655.615	2900.15	662.923
	91	437.429	348.357	114.143	91	488.769	2448.15	385.538
	92	547.286	402.714	131.571	92	343.538	2038	459.769
	93	712.429	530.714	125.5	93	243.077	2466.15	518.154
	94	711.786	715.643	138.643	94	221.231	2725.77	683.769
	95	680.071	649.357	168.643	95	341.231	2355.31	827
	96	628.143	508.714	238.429	96	435.077	1887.62	1031.77
	97	417.214	376.5	241.786	97	440.923	1549.69	1358.23
	98	673.071	208.786	232.714	98	405.692	1270.46	2481.46
	99	624.786	204.071	217.643	99	324.846	1178.15	3667.15
	100	456.714	128.5	143.786	100	563.846	958.923	3563.08
	101	688	150.286	140.357	101	747.692	1054.15	2753.85
	102	777.357	167.714	104	102	628.923	1220.69	2433.92
	103	602.214	332.786	92.071	103	263.154	1281.62	2707.61
	104	606.643	527.357	110.857	104	177.846	1277.54	2907.39
	105	745.429	586.714	145.643	105	277.692	1218.77	2438.92
	106	636.571	511.429	159	106	303.692	1016.62	1583.08
	107	455.071	393.214	204.5	107	457.462	770.308	888
	108	465.786	320.429	168.286	108	341.769	765	517.692
	109	457.071	226.071	150.214	109	555.154	1039.38	445.308
	110	431.286	326.786	99.786	110	503.692	1191	665
	111	441.857	307.786	127.714	111	975.769	919.154	731
	112	551.357	235.357	234.143	112	1032.38	566.385	529.077
	113	548.714	201.071	193.929	113	895.846	429.308	532.154
	114	510.5	324	229.429	114	812.231	680	518.077
	115	536.786	409.714	224.429	115	912.077	685.154	534.231
	116	799.929	440.571	299	116	1461.62	490.538	570.462
	117	782.714	595.357	215.5	117	1973.15	437.692	866.923
	118	768.5	750.929	206.214	118	2499.08	491.308	1514.46
	119	764.786	741	165.214	119	2531.46	473.538	2547.54
	120	932.071	820.571	168.214	120	1800.15	521.846	3520.77
	121	1067.71	877.214	95.643	121	1233.23	630.923	3472.15
	122	790.5	818.571	180.571	122	1239.85	882.154	2332.54
	123	526.929	718.786	166.357	123	1033.23	747.308	1609.77
	124	325.929	586	139.286	124	1797.38	560.538	1892.77
	125	404.357	713	173.714	125	1754.31	456.308	2156.23
	126	351.714	702.429	203.143	126	1110.62	486.077	2471.08
	127	204.286	704.071	82	127	627	548.769	2721.54
	128	327.286	720.643	97.429	128	524.692	843.077	2478.61
	129	324.214	755.357	137.714	129	662.077	1109.77	2089.46
	130	266.214	698	60.357	130	1029.38	1102.31	2312.31
	131	285.214	414.5	87.786	131	1429.62	833.385	2710.85
	132	286.286	265.929	89.071	132	1534.77	647.077	3299.61
	133	290.714	266.143	94	133	1536.08	605.077	3178.69
	134	437.929	230.357	71.429	134	1539.38	831.462	2920.92
	135	516.786	217.429	95.643	135	1182.23	946.538	2665.39
	136	559.786	199.643	42.357	136	869.923	962.692	2636
	137	526	345.714	36.786	137	865.846	748	2755.08
	138	655.357	330.857	94.643	138	933.769	694.077	3048.39
	139	590.071	295.786	99	139	1045.69	758.923	3653.77
	140	354.786	259	105.286	140	1190.69	852.923	3598.46
	141	569.071	235.786	95.357	141	1661.54	824.154	2833.46
	142	470.214	298.857	196.929	142	1618.92	699.308	1744.08
	143	442.929	402	206.286	143	1413.46	528.923	965.308
	144	353.929	446.929	184.929	144	1498.54	437.077	576.923
	145	357.286	413.571	171.714	145	2057.85	338.538	374.462
	146	388.857	456.143	183.214	146	1912.54	256.154	370.615
	147	374.786	434.571	122.714	147	1565.69	323.538	275.769
	148	691.214	573.571	122	148	1368.69	357.846	191.692
	149	853	671.286	129.214	149	1033.38	378.846	245.769
	150	546	656.857	198.571	150	680.692	179.692	407.846
	151	466	603.357	178.786	151	701	187.692	441.538
	152	312.571	488.571	123	152	1123.77	141.769	463.385
	153	437.929	366.071	108.357	153	1551.15	151.923	548.769
	154	407.071	348.786	155.357	154	1786.15	209.769	661.923
	155	360.571	416.786	158.929	155	2010.54	409.846	806.308
	156	552.5	372.786	68.429	156	2060.61	741	1330.08
	157	422.643	306.571	87.929	157	1544.46	940.462	2097.54
	158	458.929	352.286	103.071	158	623.923	1075.92	2776.15
	159	649.429	338.929	108.643	159	275.923	810.462	2823.23
	160	1002.29	393.714	110.857	160	238.077	746.462	2146.15
	161	1082.64	383.786	88.357	161	86.077	705.846	1805.92
	162	1056	519.643	115.714	162	97	655.385	1652.85
	163	1169.07	546.429	94.071	163	88.615	504.462	1398.77
	164	1059.07	523.214	99.857	164	141.077	449.615	1008.54
	165	1499.21	450.929	94.071	165	100.692	581.615	972.154
	166	1747.64	461.071	119.571	166	107.462	684.231	1075.69
	167	1733.5	624.857	146.786	167	335.846	1135.08	1545.31
	168	1464.71	615.571	190.071	168	692.077	1547.85	2472.77
	169	1243.93	684.286	344.071	169	1282.08	1535.31	3239.85
	170	1054.21	759.571	687.429	170	1406.15	1126.92	3031.85
	171	921.786	1048.21	899.286	171	1150.31	916.846	3156.23
	172	741.429	1183.5	891.071	172	912.308	628.846	3591.23
	173	569.286	1450.93	1020.21	173	476.077	538.615	4129.85
	174	570.643	1374.14	1190.79	174	461.308	527.231	4540.85
	175	473.214	1084.43	1213.93	175	461.154	518.692	3894.39
	176	372.071	1018.93	915	176	276.615	760.308	2610.92
	177	261.429	1122	440	177	354.923	956.462	1956.08
	178	355.357	1452.43	141.214	178	666.538	1239.38	1367.62
	179	244.786	1432.43	80.143	179	1165.46	1069.31	918.615
	180	489.071	1234.64	209.714	180	828.154	857.385	505.615
	181	462.5	1255.79	293.643	181	470.462	629.462	560.538
	182	483.786	1567.07	413.286	182	438.538	563	795.308
	183	356.357	1894.21	551.214	183	250.923	575.538	1124.54
	184	265	1801.71	451.857	184	146.462	656.615	1335
	185	190	1681.93	320.357	185	351.692	792.308	1447
	186	161.429	1497.79	354.214	186	524.308	721	1783.31
	187	145.929	1382.21	349.071	187	500.923	557.308	3265.15
	188	182	1463.5	522.857	188	176.615	628.308	4923.61
	189	177.071	1195.79	982.5	189	98.308	1219.31	5440.61
	190	148.357	804.429	2098.93	190	103.692	1924.46	5008.31
	191	156.429	366.714	3460.5	191	141.231	1988.08	3423.31
	192	253.857	320.071	4812.21	192	139.077	1627.77	1984
	193	237.429	302.929	5221.07	193	437.077	1730.31	1666.85
	194	301.5	217.714	4635.93	194	1333.69	2140.85	1736
	195	347.714	144.286	3811.21	195	2568.85	2511.61	1567.62
	196	475.571	112.714	3223.36	196	2915.61	2867.61	1511.23
	197	527.929	128.429	2680.14	197	3278.23	2828.85	1258.62
	198	582.786	164.214	2795.64	198	3862.15	2249.69	880
	199	598.714	173.571	3167.79	199	3809.54	1820	535.462
	200	665.286	95.286	3058	200	2696.23	1680.31	327.462
	201	562.786	107	2406.07	201	1610.69	1562.15	269.154
	202	554.5	205.286	2167.5	202	1434.08	1713.15	313.385
	203	543.857	315.071	2085.43	203	1852.08	1980.92	414.615
	204	361	259.643	1788.86	204	1971	2441.54	382
	205	186	129.214	1328.29	205	1455.62	3006.61	580.538
	206	239.143	126.286	1121	206	747.077	3001.77	818.692
	207	266.786	121.143	1181.86	207	396.462	2440.31	699.308
	208	247.214	108.071	1313.79	208	672.846	1993.46	747.231
	209	264.571	149.429	1399.57	209	624	1937.77	1227
	210	369.714	199.071	1308.43	210	356.538	1736.54	1934.54
	211	283.714	135.929	1216.14	211	214.538	1780.85	1838.69
	212	304.214	83.214	1256.57	212	149.846	2190.46	1853.31
	213	457.286	136.429	1546.79	213	427.154	2614.92	1840.08
	214	317.643	97.714	1925.64	214	582	2840.39	2003.23
	215	280.214	135.929	2015.86	215	525.846	3468.31	2326
	216	314.071	199.429	1427.07	216	422.923	3745.08	1990.31
	217	424.714	267.643	927.429	217	392.923	2776.61	1408.77
	218	366.143	129.857	526.143	218	301.769	1522	805.308
	219	279.357	176.643	372.143	219	238.692	894.769	371.923

## Sheet: Figure 1H
	Calculations of the pixel intensity ratio between the edge and cytosolic area ( translocation ratio)
	Wt				ob/ob
	Edge/cytosol	NT	TG 10min	TG 30min	NT	TG 10min	TG 30min
	1	1.19888	3.68965	4.18832	1.06235	1.10517	2.04068
	2	0.899928	3.77892	5.29242	1.26234	2.01651	1.42368
	3	0.940848	3.34887	3.7341	2.88682	0.992327	1.52068
	4	0.860341	3.17357	1.86623	1.87036	0.905979	2.77241
	5	0.82968	4.04701	4.2132	2.90401	3.03825	3.24428
	6	0.72518	1.52586	3.47817	2.21216	4.56907	2.00361
	7	2.78273	4.20027	2.72575	2.9079	3.89209	4.33588
	8	3.13234	3.25732	3.18952	4.48736	4.02156	1.05294
	9	2.17691	3.02221	5.08822	1.6222	1.46465	0.827511
	10	2.40529	1.95593	5.1737	2.56976	2.20909	1.26039
	11	1.56352	4.21554	3.62788	2.79758	1.64453	1.48153
	12	1.41059	5.71111	1.90407	3.27317	1.85973	1.55779
	13	1.19199	6.34614	3.49889	1.37204	2.04456	1.84886
	14	0.75298	1.24857	5.80653	2.77641		1.34522
	15	0.450704	0.702039	6.66516			1.84695
	16	0.778088	3.99841	3.51713			2.05708
	17	1.04803	4.78265	4.97125			1.76756
	18	1.50314	5.60709	5.98053			2.63101
	19	2.36046	3.94346	7.08819			3.4538
	20	2.43142	5.67344	4.49965			3.09366
	21	3.5106	3.10235	3.89099			3.64575
	22	2.21206	5.93132	9.42911			2.2513
	23	2.12729	3.94432	1.69565			1.60227
	24	1.54334	5.53012	4.90864			2.08136
	25		3.69255	6.10151			2.08116
	26			2.42889			1.11823
	27			4.78579			1.26194
	28			6.64941			0.895086
	29			10.1945			1.14828
	30			11.9994
	31			8.15629
	32			5.2721
	33			3.46499
	34			5.22519
	35			7.88018
	36			3.51038
	37			9.82335
	38			4.0113
	39			5.13197
	40			3.69982
	41			4.13236
	42			4.95825
	43			3.45225
	44			4.79084
	45			3.92221
	Average	1.61818	3.85715	5.02276	2.42889	2.2895	1.98796
	SD	0.847477	1.47889	2.23651	0.930113	1.2161	0.884292
	SE	0.17299	0.295778	0.333399	0.248583	0.337286	0.164209
	N	24	25	45	14	13	29
			Unpaired t test between:		p-value
			WT NT	WT TG 10min	<0.0001
			WT NT	WT TG 30min	<0.0001
			WT NT	ob/ob NT	0.0094
			ob/ob NT	ob/ob TG 10min	0.7396
			ob/ob NT	ob/ob TG 30min	0.1395
