# Supplementary material for: Defective STIM-mediated store operated Ca2+ entry in hepatocytes leads to metabolic dysfunction in obesity
Source: eLife. 2017 Dec 15;6:e29968. doi: 10.7554/eLife.29968 (PMC5777820; doi:10.7554/eLife.29968)
Supplement: Figure 3—source data 1. [file elife-29968-fig3-data1.xlsx]

## Sheet: Figure 3A
		Representative trace of cytosolic Ca mesurment
		Time (sec)	WT	STIM1DLiver			Tg response		SOCE response
		0	1.01224	1.02527			WT	STIM1DLiver	WT	STIM1DLiver
		5	0.99637	1.02132		1	1.51894	1.12222	2.05412	1.39972
		10	0.994249	1.01898		2	1.62103	1.14544	1.93679	2.1212
		15	1.00487	1.01622		3	1.61797	1.11698	1.93796	1.0485
		20	1.01717	1.01275		4	1.42461	1.07088	2.26744	2.02603
		25	1.01409	1.00899		5	1.51511	1.03832	2.22863	2.49225
		30	1.00599	1.00043		6	1.43847	1.02882	1.9214	1.83162
		35	0.989615	0.998321		7	1.45145	1.04432	2.63869	1.24101
		40	0.979968	0.996027		8	1.13375	1.07015	2.44685	1.04471
		45	0.969555	0.994066		9	1.44256	1.03533	2.77163	1.04196
		50	0.971239	0.990999		10	1.38918	1.09802	2.96859	1.17387
		55	0.972981	0.989109		11	1.40281	1.13621	2.35096	4.41873
		60	0.992216	0.991219		12	1.17405	1.03682	2.51563	3.86346
		65	1.00181	0.992559		13	1.17979	1.05794	2.28889	1.0414
		70	1.00653	0.995027		14	1.08357	1.01548	1.97877	1.10104
		75	1.00199	0.999332		15	1.46429	1.04978	2.70747	1.03063
		80	1.02933	1.0041		16	1.28859	1.14574	3.15545	1.01695
		85	1.0383	1.01004		17	1.23345	1.06342	2.74826	2.45478
		90	1.05512	1.01546		18	1.21064	1.0297	2.85251	1.02272
		95	1.06763	1.02069		19	1.37992	1.03041	2.84847	1.07139
		100	1.09475	1.0311		20	1.27647	1.03738	2.41496	1.02274
		105	1.17061	1.03794		21	1.43543	1.04942	2.06076	2.11569
		110	1.23241	1.04353		22	1.69113	1.05065	2.0651	1.14241
		115	1.25632	1.05094		23	1.52551	1.06882	1.87742	2.07515
		120	1.28608	1.05808		24	1.34281	1.03635	2.16505	3.22255
		125	1.27858	1.0607		25	1.01969	1.07836	2.10488	1.24504
		130	1.28687	1.05985		26	1.44074	1.13307	2.06757	1.09198
		135	1.31325	1.06078		27	1.05443	1.06382	2.00945	1.02174
		140	1.3075	1.0558		28	1.1696	1.43803	2.0529	1.04875
		145	1.2826	1.05632		29	1.248	1.18323	2.11015	3.64452
		150	1.30181	1.0505		30	1.10136	1.07263	2.24908	4.70125
		155	1.29723	1.04294		31	1.36366	1.07955	2.59262	1.04361
		160	1.30128	1.0324		32	1.27585	1.07784	2.76453	1.04724
		165	1.28634	1.02791		33	1.52675	1.10338	1.53205	1.02733
		170	1.27343	1.02284		34	1.41736	1.09322	1.83924	1.05156
		175	1.25196	1.01751		35	1.70352	1.07532	1.97308	1.02308
		180	1.25903	1.01368		36	1.7201	1.11454	2.25116	1.02864
		185	1.27045	1.00924		37	1.89447	1.05824	1.66434	1.02552
		190	1.27012	1.00425		38	1.44239	1.05346	1.77615	1.02612
		195	1.26864	0.99496		39	1.4402	1.10263	1.86757	1.06632
		200	1.238	0.986669		40	1.18858	1.11008	1.93797	1.04239
		205	1.21529	0.977036		41	1.6248	1.0577	1.64743	1.05091
		210	1.19522	0.972272		42	1.61513	1.07223	2.16406	1.0734
		215	1.17592	0.960663		43	1.57633	1.12298	1.66934	1.04693
		220	1.17311	0.950709		44	1.54956	1.05532	1.30816	1.07771
		225	1.17021	0.945885		45	1.40132	1.07684	1.71993	1.0212
		230	1.14747	0.937444		46	1.52814	1.16973	1.79838	1.1319
		235	1.13806	0.930027		47	1.41548	1.06786	2.34352	1.05691
		240	1.12929	0.921486		48	1.35849	1.03576	1.88176	1.10513
		245	1.11563	0.916561		49	1.35491	1.0863	2.53225	1.05432
		250	1.12497	0.90674		50	1.4762	1.06788	1.83353	1.02224
		255	1.11042	0.902059		51	1.5141	1.07429	2.00713	1.06264
		260	1.09877	0.897375		52	1.57462	1.16548	2.72014	1.02248
		265	1.087	0.893174		53	1.51635	1.0651	1.68743	1.0867
		270	1.07058	0.889469		54	1.54962	1.05324	1.77994	1.02735
		275	1.06046	0.890007		55	1.5329	1.07745	2.35916	1.03674
		280	1.05976	0.883945		56	1.58145	1.05712	3.44068	1.03155
		285	1.04171	0.881145		57	1.40013	1.10038	2.96518	1.03968
		290	1.02878	0.879468		58	1.56202	1.06773	2.15951	1.13079
		295	1.01093	0.873773		59	1.49594	1.20405	2.38984	1.11885
		300	0.995397	0.869571		60	1.45593	1.10393	1.8716	1.0608
		305	0.986009	0.862165		61	1.45188	1.09718	1.84738	1.04752
		310	0.98695	0.85797		62	1.03271	1.29378	1.9078	1.23336
		315	0.967095	0.852232		63	1.4537	1.13333	1.70188	1.04605
		320	0.955496	0.848771		64	1.3418	1.06904	1.64584	1.47216
		325	0.939924	0.841686		65	1.50049	1.02421	2.04468	1.05251
		330	0.925433	0.836344		66	1.18446	1.20512	2.98883	1.09447
		335	0.91401	0.832461		67	1.16944	1.13033	3.33022	1.07899
		340	0.92032	0.828158		68	1.04488	1.38945	2.81937	1.23586
		345	0.910126	0.823192		69	1.11576	1.14836	2.42467	1.14193
		350	0.903349	0.818215		70	1.04822	1.12332		1.27403
		355	0.901825	0.814844		71	1.08858	1.10996		1.15958
		360	0.89627	0.810644		72	1.36837	1.08326		1.17764
		365	0.884029	0.810558		73	1.16558	1.11999		1.31632
		370	0.873764	0.806782		74	1.31621	1.14522		1.19379
		375	0.860355	0.803214		75	1.19295	1.17751		1.14789
		380	0.844288	0.799002		76	1.12136	1.36566		1.21364
		385	0.846499	0.794234		77	1.3253	1.14108		1.13533
		390	0.849143	0.787926		78	1.48206	1.20082		1.08837
		395	0.840872	0.783749		79	1.18434	1.0811		1.0653
		400	0.827496	0.780821		80	1.1448	1.08452		1.13704
		405	0.814447	0.775606		81	1.28266	1.04061		1.15018
		410	0.810359	0.771672		82	1.16621	1.06218		1.11571
		415	0.80783	0.766749		83	1.23481	1.02334		1.10949
		420	0.804083	0.763435		84	1.33554	1.08327		1.03005
		425	0.796052	0.759866		85	1.21931	1.05841		1.07988
		430	0.790908	0.756865		86	1.29313	1.0588		1.07493
		435	0.78108	0.753515		87	1.17062	1.02144		1.05224
		440	0.775005	0.752419		88	1.43227	1.03869		1.07668
		445	0.765349	0.749871		89	1.32243	1.02658		1.02746
		450	0.762451	0.75033		90	1.241	1.12927		1.05517
		455	0.763341	0.750596		91	1.31301	1.08641		1.05493
		460	0.76665	0.749679		92	1.42529	1.06471		1.03916
		465	0.765108	0.748611		93	1.54961	1.08243		1.00783
		470	0.768893	0.748132		94	1.29882	1.02283		1.03687
		475	0.764251	0.746297		95	1.18292	1.03991		1.04352
		480	0.762369	0.743022		96	1.40518	1.04918		1.04534
		485	0.761136	0.742271		97	1.43645	1.10284		1.044
		490	0.762446	0.739649		98	1.13283	1.19322		1.18212
		495	0.805452	0.736606		99		1.07355		1.09007
		500	0.852094	0.734109		100		1.12704		1.08032
		505	0.932961	0.731878		101		1.0989		1.08652
		510	1.04911	0.731441		102		1.20985
		515	1.16816	0.727241		103		1.23201
		520	1.27308	0.724549		104		1.25087
		525	1.38509	0.722506		105		1.15444
		530	1.44801	0.719953		106		1.28736
		535	1.51931	0.718086		107		1.28083
		540	1.59272	0.716091		108		1.51096
		545	1.65324	0.713915		109		1.15018
		550	1.68245	0.714543		110		1.24318
		555	1.72864	0.711656		111		1.20535
		560	1.75175	0.711766		112		1.25476
		565	1.75686	0.710185		113		1.65966
		570	1.78161	0.706592		114		1.57035
		575	1.82803	0.703829		115		1.08526
		580	1.84825	0.70036		116		1.42807
		585	1.85311	0.698322		Average	1.36231	1.12351	2.21716	1.30899
		590	1.80634	0.697698		SD	0.179844	0.112421	0.45745	0.68563
		595	1.78242	0.695213		SE	0.018167	0.010438	0.0550705	0.0682228
		600	1.79892	0.690772		N	98	116	69	101
		605	1.81359	0.687821		Unpaired t test between WT and STIM1			Unpaired t test between WT and STIM1
		610	1.821	0.684404		P value		p<0.0001	P value	p<0.0001
		615	1.80387	0.683191
		620	1.76265	0.682346
		625	1.76218	0.679635
		630	1.74505	0.678719
		635	1.73611	0.67774
		640	1.7396	0.678435
		645	1.76311	0.680449
		650	1.78578	0.68229
		655	1.78044	0.682171
		660	1.7528	0.685229
		665	1.74251	0.684358
		670	1.73838	0.686749
		675	1.75085	0.688135
		680	1.73792	0.6873
		685	1.72891	0.687527
		690	1.74228	0.68846
		695	1.71623	0.690985
		700	1.70219	0.690121
		705	1.69413	0.687909
		710	1.65138	0.686346
		715	1.66126	0.68492
		720	1.69599	0.682751
		725	1.69326	0.682615
		730	1.68442	0.681606
		735	1.67921	0.67985
		740	1.66463	0.678016
		745	1.66831	0.676168
		750	1.67533	0.675613
		755	1.66982	0.676896
		760	1.6534	0.675963
		765	1.63982	0.674358
		770	1.64686	0.673717
		775	1.6336	0.671068
		780	1.63588	0.670768
		785	1.63716	0.66741
		790	1.64521	0.66447
		795	1.64679	0.665284
		800	1.64152	0.663614
		805	1.60686	0.662918
		810	1.61806	0.659666
		815	1.63115	0.657856
		820	1.6459	0.655062
		825	1.64911	0.651647
		830	1.63337	0.65058
		835	1.61188	0.648861
		840		0.646762
		845		0.645352
		850		0.643468
		855		0.642952
		860		0.643214
		865		0.64434
		870		0.642719
		875		0.641634
		880		0.640155
		885		0.638825
		890		0.637116
		895		0.634386
		900		0.633854
		905		0.633007
		910		0.629974

## Sheet: Figure 3B
	pJNK										peIF2alpha
		WT	STIM1DLiver	WT	STIM1DLiver	WT	STIM1DLiver	WT	STIM1DLiver			WT	STIM1DLiver	WT	STIM1DLiver	WT	STIM1DLiver	WT	STIM1DLiver
	Time (min) of Tg treatment	0		30		90		120			Time (min) of Tg treatment	0		30		90		120
		56013	67497	84885	115210	62439	110934	60846	74056			23668	31056	31906	48928	32599	38980	27815	24676
		54967	67482	89254	109705	57562	100576	57472	60313			28609	33846	32965	47375	29805	33516	26242	21927
		27578	52790	90687	117408	44515	97519
		25039	56394	98423	111551	68876	92790
		49510	40083	73147	66341	49729	65428
		45949	35617	69911	62134	52620	72063
	JNK										eIF2alpha
		WT	STIM1DLiver	WT	STIM1DLiver	WT	STIM1DLiver	WT	STIM1DLiver			WT	STIM1DLiver	WT	STIM1DLiver	WT	STIM1DLiver	WT	STIM1DLiver
	Time (min) of Tg treatment	0		30		90		120			Time (min) of Tg treatment	0		30		90		120
		64570	65600	73164	65690	78859	66058	77685	61927			89267	99759	82906	101658	94160	80777	103292	86470
		65340	70567	71054	60661	73803	61823	76491	60020			78650	107521	94593	85310	95929	85307	99036	87564
		19809	49656	54904	53797	50129	45739
		32872	48138	68780	46062	55597	41616
		54347	48136	55012	47515	52303	46533
		54147	48581	51301	48189	50408	44070
	pJNK/JNK										peIF2alpha/eIF2alpha
		WT	STIM1DLiver	WT	STIM1DLiver	WT	STIM1DLiver	WT	STIM1DLiver			WT	STIM1DLiver	WT	STIM1DLiver	WT	STIM1DLiver	WT	STIM1DLiver
	Time (min) of Tg treatment	0		30		90		120			Time (min) of Tg treatment	0		30		90		120
		0.867477	1.02892	1.1602	1.75384	0.79178	1.67934	0.78324	1.19586			0.265137	0.31131	0.384845	0.4813	0.346209	0.482563	0.269285	0.285371
		0.841246	0.956283	1.25614	1.80849	0.779941	1.62684	0.751356	1.00488			0.363751	0.314785	0.348493	0.555328	0.310699	0.392887	0.264974	0.250411
		1.3922	1.06311	1.65174	2.18243	0.888009	2.13208
		0.761712	1.17151	1.43098	2.42176	1.23884	2.22967
		0.910998	0.832703	1.32966	1.39621	0.950787	1.40606
		0.848597	0.733147	1.36276	1.28938	1.04388	1.63519
	pJNK/JNK normalized by control										peIF2alpha/eIF2alpha normalized by control
		WT	STIM1DLiver	WT	STIM1DLiver	WT	STIM1DLiver	WT	STIM1DLiver			WT	STIM1DLiver	WT	STIM1DLiver	WT	STIM1DLiver	WT	STIM1DLiver
	Time (min) of Tg treatment	0		30		90		120			Time (min) of Tg treatment	0		30		90		120
		1.0001	1.1862	1.3376	2.022	0.9128	1.9361	0.903	1.3787			0.98199	1.153	1.42535	1.78259	1.28225	1.78727	0.997352	1.05693
		0.9698	1.1025	1.4482	2.085	0.8992	1.8755	0.8662	1.1585			1.34723	1.16587	1.29071	2.05677	1.15074	1.45514	0.981386	0.927449
		1.002	0.765	1.188	1.57	0.639	1.534				Average	1.16461	1.15944	1.35803	1.91968	1.21649	1.6212	0.989369	0.992188
		0.548	0.843	1.029	1.742	0.891	1.604				N	2	2	2	2	2	2	2	2
		1	0.914	1.46	1.533	1.044	1.543
		0.932	0.805	1.496	1.415	1.146	1.795
	Average	0.90865	0.93595	1.32647	1.72783	0.922	1.7146	0.8846	1.2686
	SD	0.17876	0.170797	0.183943	0.273875	0.171298	0.176471	0.0260215	0.155705
	SE	0.0729783	0.0697274	0.0750944	0.111809	0.069932	0.0720441
	N	6	6	6	6	6	6	2	2
				Unpaired t test between WT and STIM1		Unpaired t test between WT and STIM1
	P value			* P value	p=0.0138	# P value	p< 0.0001
											Pool of 1 experiment
	Pool of 3 diferent experiments

## Sheet: Figure 3C
	pIR								pAKT
		WT	STIM1DLiver	WT	STIM1DLiver	WT	STIM1DLiver			WT	STIM1DLiver	WT	STIM1DLiver	WT	STIM1DLiver
	Time (min) after Insulin	0		3		6			Time (min) after Insulin	0		3		6
		50866	60077	69060	59857	62788	59324			7223	10787	25449	9121	28647	4652
		43586	57436	61993	51224	62820	52202			4958	9612	21380	9997	20546	4585
		27186	22487	73758	45214	24448	16487			22459	23342	34974	27437	60048	43061
			18207	27824	18649	27389	18812			25523	21795	34686	25504	51955	45984
				25938	13242							35823	23716
	IR								AKT
		WT	STIM1DLiver	WT	STIM1DLiver	WT	STIM1DLiver			WT	STIM1DLiver	WT	STIM1DLiver	WT	STIM1DLiver
	Time (min) after Insulin	0		3		6			Time (min) after Insulin	0		3		6
		34971	33865	36413	36866	38127	32143			38523	31862	35296	29124	33667	33548
		35386	35659	34088	33766	34879	35587			39624	30817	33254	23454	31669	33766
		26045	27438	35342	33836	25568	25795			38733	43659	34954	40094	37793	46158
			25624	26428	25742	31680	20571			41586	40292	34449	42378	37625	46336
				19208	15061							35724	41303
	pIR/IR								pAKT/AKT
		WT	STIM1DLiver	WT	STIM1DLiver	WT	STIM1DLiver			WT	STIM1DLiver	WT	STIM1DLiver	WT	STIM1DLiver
	Time (min) after Insulin	0		3		6			Time (min) after Insulin	0		3		6
		1.45452	1.77401	1.89658	1.62364	1.64681	1.84563			0.187498	0.338554	0.721017	0.313178	0.850893	0.138667
		1.23173	1.6107	1.81862	1.51703	1.80108	1.46688			0.125126	0.311906	0.64293	0.426239	0.648773	0.135787
		1.04381	0.819557	2.08698	1.33627	0.956195	0.639155			0.579841	0.534643	1.00057	0.684317	1.58887	0.932904
			0.710545	1.05282	0.724458	0.864552	0.914491			0.61374	0.540926	1.00688	0.601822	1.38086	0.992403
				1.35037	0.879224							1.00277	0.574196
	pIR/IR normalized by control								pAKT/AKT normalized by control
		WT	STIM1DLiver	WT	STIM1DLiver	WT	STIM1DLiver			WT	STIM1DLiver	WT	STIM1DLiver	WT	STIM1DLiver
	Time (min) after Insulin	0		3		6			Time (min) after Insulin	0		3		6
		1.00312	1.22346	1.30798	1.11975	1.13573	1.27285			1.00267	1.81045	3.8557	1.67475	4.55023	0.741535
		0.849469	1.11083	1.25422	1.04623	1.24213	1.01164			0.669124	1.66795	3.43813	2.27935	3.46938	0.726136
		1.00366	0.788035	2.00671	1.28487	0.919419	0.614572			0.999727	0.921799	1.72512	1.17986	2.73942	1.60846
			0.683216	1.01233	0.696594	0.8313	0.879319			1.05817	0.932631	1.736	1.03762	2.3808	1.71104
				1.29844	0.845408							1.72892	0.989992
	Average	0.952083	0.951385	1.37594	0.998571	1.03214	0.944595		Average	0.932422	1.33321	2.49677	1.43231	3.28496	1.19679
	SD	0.0888665	0.256933	0.372668	0.23107	0.189621	0.274117		SD	0.177579	0.472414	1.06027	0.545759	0.957432	0.536251
	SE	0.0513071	0.128467	0.166662	0.103338	0.0948107	0.137059		SE	0.0887896	0.236207	0.474166	0.244071	0.478716	0.268125
	N	3	4	5	5	4	4		N	4	4	5	5	4	4
				Unpaired t test
	P value			P value	* p=0.0110				P value			* P value	p=0.032	# P value	p=0.0088
	Pool of 2 diferent experiments

## Sheet: Figure 3E
	Glucose Production in Primary Hepatocytes				Glucose Production in Primary Hepatocytes
		Pair 1				Used in the final graph
		WT	STIM1KO			Average
	Well1	3.71968	5.09859			WT	STIM1 KO
	Well2	4.49675	5.10357			Glucose Production nMol/mg ptn
	Well3	4.74566	5.56682		1	4.42295	5.44015
	Well4	4.94503	5.99161		2	4.0574	5.47603
	Well5	4.20764			3	3.94539	4.36382
	Average	4.42295	5.44015		4	3.98569	4.41652
					Average	4.10286	4.92413
		Pair 2			SD	0.2149	0.6185
		WT	STIM1KO		SE	0.1074	0.3092
	Well1	3.7396	5.32323		N	4	4
	Well2	3.87281	5.32058		Unpaired t test between WT and STIM1KO		p=0.042
	Well3	3.5968	5.78427
	Well4	4.51494
	Well5	4.56286
	Average	4.0574	5.47603
		Pair 3
		WT	STIM1KO
	Well1	4.02671	4.22107
	Well2	3.91393	4.3217
	Well3	4.04657	4.23108
	Well4	3.79433	4.5118
	Well5		4.53344
	Average	3.94539	4.36382
		Pair 4
		WT	STIM1KO
	Well1	4.17921	4.34253
	Well2	4.11736	4.36723
	Well3	3.68798	4.47745
	Well4	3.95821	4.6211
	Well5		4.50465
	Well6		4.32303
	Well7		4.37158
	Well8		4.32456
	Average	3.98569	4.41652

## Sheet: Figure 3H and I
	16 hours Fasting Glucose (mg/dl)
		STIM1+/+ adAlb-cre	STIM1fl/+ adAlb-cre	STIM1fl/fl adAlb-cre
	1	90	79	92
	2	80	82	95
	3	87	88	92
	4	71	82	92
	5	89	81	96
	6		83	94
	7			87
	8			99
	Average	83.4	82.5	93.375
	SD	7.95613	3.01662	3.5431
	SE	3.55809	1.23153	1.25268
	N	5	6	8
				Unpaired t test between WT and STIM1
	P value			* p=0.0094 versus STIM +/+
				# p< 0.0001 versus STIM fl/+
	Body Weight (gr)
		STIM1+/+ adAlb-cre	STIM1fl/+ adAlb-cre	STIM1fl/fl adAlb-cre
	1	26.7	24.8	23.6
	2	25.2	24.8	25.2
	3	22.8	25.3	22.4
	4	24.6	23.3	25.3
	5	25.4	24.5	23
	6		26	23.7
	7			27.9
	8			26.3
	Average	24.94	24.7833	24.675
	SD	1.42056	0.897589	1.84372
	SE	0.635295	0.366439	0.651852
	N	5	6	8
	Insulin (ng/mL)
		STIM1+/+ adAlb-cre	STIM1fl/+ adAlb-cre	STIM1fl/fl adAlb-cre
	1	0.419	0.395	0.352
	2	0.426	0.381	0.428
	3	0.462	0.416	0.681
	4	0.474	0.607	0.481
	5	0.396	0.218	0.492
	6		0.612	0.371
	7			0.541
	8
	Average	0.4354	0.438167	0.478
	SD	0.0320437	0.150212	0.111958
	SE	0.0143304	0.061324	0.0423163
	N	5	6	7

## Sheet: Figure 3J and K
	Glucose Tolerance Test
											Versus STIM1 fl/fl	Versus STIM1 fl/+
	Time (min)	STIM1+/+ adAlb-cre					Average	SD	SE	N	p Value	p Value
	0	90	80	87	71	89	83.4	7.95613	3.55809	5	n.s	n.s
	15	280	392	348	299	239	311.6	59.618	26.662	5	n.s	n.s
	30	170	334	not measured	289	261	263.5	69.2074	30.9505	5	p=0.0437	p=0.0007
	60	119	167	158	149	154	149.4	18.2291	8.1523	5	p=0.0421	n.s
	90	118	162	149	110	118	131.4	22.7112	10.1568	5	n.s	n.s
	120	115	120	119	108	111	114.6	5.12835	2.29347	5	n.s	n.s
	Time (min)	STIM1+/- adAlb-cre						Average	SD	SE	N
	0	79	82	88	82	81	83	82.5	3.01662	1.23153	6
	15	255	314	382	307	301	273	305.333	43.7112	17.845	6
	30	264	281	251	259	279	242	262.667	15.371	6.27517	6
	60	163	153	199	128	185	120	158	30.9968	12.6544	6
	90	117	116	174	108	125	125	127.5	23.6538	9.6566	6
	120	98	101	166	104	109	111	114.833	25.5297	10.4225	6
	Time (min)	STIM1fl/fl adAlb-cre								Average	SD	SE	N
	0	92	95	92	92	96	94	87	99	93.375	3.5431	1.25268	8
	15	432	338	371	313	317	388	292	379	353.75	46.757	16.5311	8
	30	354	308	316	330	336	285	398	317	330.5	34.0336	12.0327	8
	60	207	170	196	226	183	158	315	174	203.625	49.9855	17.6726	8
	90	175	105	128	161	142	135	212	153	151.375	32.4739	11.4813	8
	120	159	104	118	124	129	120	151	114	127.375	18.6696	6.6007	8
		Area under the curve GTT
			STIM1+/+ adAlb-cre	STIM1fl/+ adAlb-cre	STIM1fl/fl adAlb-cre
		1	17535	20228	28980
		2	25890	21233	22523
		3	23273	25718	24855
		4	20910	19688	26280
		5	19950	22335	24720
		6		19178	23528
		7			32063
		8			25080
		Average	21511.6	21396.7	26003.6
		SD	3197.14	2399.54	3110.23
		SE	1429.8	979.608	1099.63
		N	5	6	8
					Unpaired t test between WT and STIM1
		P value			* p=0.0291 versus STIM +/+
					#p=0.0109 versus STIM fl/+
