# Supplementary material for: Defective STIM-mediated store operated Ca2+ entry in hepatocytes leads to metabolic dysfunction in obesity
Source: eLife. 2017 Dec 15;6:e29968. doi: 10.7554/eLife.29968 (PMC5777820; doi:10.7554/eLife.29968)
Supplement: Figure 4—source data 1. [file elife-29968-fig4-data1.xls]

## Sheet: Figure 4D
	STIM1 translocation: edge/cytosol intensity ratio
		AdGFP		AdSTIM1-YFP
		NT	Tg	NT	Tg
	1	2.5677	2.17458	1.61878	6.2143
	2	0.727228	0.729487	2.08219	4.97035
	3	1.54001	2.16099	2.38904	2.255
	4	1.31941	2.02289	1.63865	8.34918
	5	2.54016	0.572558	2.46418	3.57033
	6	1.42022	3.4103	3.84909	4.01878
	7	1.30428	4.40612	2.1174	3.4592
	8	0.619081	3.02618	2.04105	4.36371
	9	0.804773	2.00937	1.86744	4.57929
	10	0.587437	3.98104	3.27571	3.91606
	11	2.2027	3.46353	4.55643	2.61416
	12	4.51851	1.14663	2.66534	4.26756
	13	2.5821	2.63354	3.03227	3.34389
	14	1.40335	0.637052	6.06937	4.92997
	15	3.06927	1.55996	4.76129	4.70515
	16	2.06352	1.50968	2.34974	4.01925
	17	2.40459	2.63051		4.68984
	18	2.86272	2.87613		6.69877
	19	2.56468	2.90704		4.82314
	20	0.771311	3.26084
	21	2.35044	3.80496
	22	1.62961	2.39037
	23	1.98718	1.24087
	24	0.3451	2.86973
	25	1.602	1.92341
	26	0.862783	1.08493
	Average	1.79424	2.32433	2.92362	4.51515
	SD	0.966897	1.0669	1.2762	1.41297
	SE	0.189624	0.209236	0.319049	0.324159
	N	26	26	16	19
		Unpaired t test
	P value	* p=0.0023 versus AdSTIM1-YFP NT		#p=0.0015 versus AdSTIM1-YFP Tg

## Sheet: Figure 4F
	Western Blot quantification
		STIM-YFP
		AdGFP	AdSTIM1-YFP
	1	0.84	24.63
	2	1.17	18.53
	Western Blot quantification
		OglcNac
		AdGFP	AdSTIM1-YFP
	1	1.11	0.81
	2	0.89	0.77

## Sheet: Figure 4H and 4I
	Representative trace of cytosolic Ca measurment
	Time (sec)	WT	STIM1DLiver			Tg response		SOCE response
	0	0.998268	1.00596			AdGFP control	AdSTIM1-YFP	AdGFP control	AdSTIM1-YFP
	5.001	0.995215	1.00931		1	1.06733	1.45834	1.53215	3.84625
	10.001	0.993526	1.00963		2	1.03677	1.59569	1.53958	2.49377
	15.001	0.993846	1.0074		3	1.17219	1.75879	1.35913	2.36229
	20.001	0.992247	1.01013		4	1.09022	1.84005	1.4435	2.28632
	25.001	0.988646	1.0105		5	1.19903	1.29678	1.62026	2.20588
	30.001	0.985629	1.00871		6	1.13998	1.5374	1.88355	2.70884
	35.001	0.987013	1.01016		7	1.13308	1.40315	1.33979	4.86327
	40.001	0.97886	1.00347		8	1.16762	1.09961	1.23875	1.74755
	45.001	0.979767	0.999587		9	1.11283	1.73045	1.3181	4.79331
	50.001	0.971107	0.99594		10	1.11206	1.19344	1.43912	6.3669
	55.001	0.964438	0.992497		11	1.21502	1.6521	1.55352	3.30044
	60.001	0.957975	0.995564		12	1.06068	1.23606	1.42614	3.04115
	65.001	0.959793	0.99325		13	1.10177	1.12664	1.90729	1.91098
	70.001	0.958759	0.996541		14	1.08462	1.32587	2.42801	2.69548
	75.001	0.958818	0.993925		15	1.1468	1.10401	1.76468	1.55094
	80.001	0.953941	0.991632		16	1.1533	1.14317	1.58885	1.30356
	85.001	0.951842	0.993023		17	1.07878	1.82179	1.50129	1.84446
	90.001	0.95775	0.991711		18	1.1462	1.08568	1.42684	1.62173
	95.001	0.961264	0.993642		19	1.19223	1.18706	1.6158	1.48221
	100.001	0.958706	0.992324		20	1.20297	1.24474	1.34978	1.48276
	105.001	0.955083	0.990092		21	1.25389	1.15794	1.63	2.02715
	110.001	0.954935	0.991796		22	1.17406	1.58049	1.20502	2.81635
	115.001	0.957902	0.988465		23	1.08196	1.56817	1.21083	2.89176
	120.001	0.956098	0.98562		24	1.11703	1.26695	1.50856	3.14038
	125.001	0.95982	0.981802		25	1.47494	1.31879	1.90482	2.34139
	130.001	0.967936	0.979489		26	1.34199	1.20536	1.79895	2.75198
	135.001	0.970452	0.977		27	1.11277	1.1181	1.47311	2.25464
	140.001	0.96879	0.971971		28	1.12894	1.12708	1.38869	2.15089
	145.001	0.97343	0.969738		29	1.10572	1.2081	1.37102	1.98761
	150.001	0.97727	0.964914		30	1.14559	1.18044	1.26897	1.85925
	155.001	0.974818	0.963489		31	1.18746	1.52091	1.57709	2.72621
	160.001	0.980342	0.961748		32	1.12695	1.50129	1.80477	2.14185
	165.001	0.976841	0.960044		33	1.37797	1.35913	1.46637	2.32276
	170.001	0.977124	0.962628		34	1.09877	1.41543	1.83993	3.05146
	175.001	0.973451	0.958779		35	1.06068	1.18034	1.49919	2.68193
	180.001	0.970863	0.956381		36	1.19855	1.18663	1.49033	2.95768
	185.001	0.969062	0.949398		37	1.1082	1.0655	1.59045	3.78725
	190.001	0.961794	0.951594		38	1.10162	1.16983	1.59021	1.75452
	195.001	0.962865	0.953938		39	1.66685	1.41699	1.41951	1.9965
	200.001	0.957029	0.954847		40	1.27587	1.27818	1.75655	1.52983
	205.001	0.954572	0.959515		41	1.2965	1.44286	1.41665	2.08231
	210.001	0.95439	0.965928		42	1.13448	1.45067	1.63586	2.00995
	215.001	0.955468	0.975375		43	1.23954	1.48596	1.59863	2.12827
	220.001	0.952485	0.987246		44	1.10231	1.47391	1.64592	1.48619
	225.001	0.956732	1.00578		45	1.15653	1.37063	1.42601	2.03675
	230.001	0.957132	1.02459		46	1.10206	1.34102	1.20951	2.62243
	235.001	0.963838	1.04755		47	1.02196	1.69211	1.27426	1.96603
	240.001	0.969021	1.07388		48	1.30636	1.31372	1.92768	2.01218
	245.001	0.973723	1.10476		49	1.4017	1.59914	1.89434	1.47992
	250.001	0.980549	1.13167		50	1.48132	1.22975	2.01687	1.9504
	255.001	0.989644	1.16077		51	1.32783	1.10319	1.29043	2.16824
	260.001	0.997008	1.18741		52	1.23291	1.30751	1.24371	2.07215
	265.001	1.00648	1.21307		53	1.42396	1.08773	1.25813	2.29095
	270.001	1.01571	1.23172		54	2.28355	1.09111	1.53343	2.39921
	275.001	1.01998	1.24567		55	1.11958	1.12298	1.20823	2.22692
	280.001	1.02511	1.25352		56	1.238	1.36136	1.10206	3.631
	285.001	1.02634	1.25544		57	1.68512	1.37427	1.33936	2.78218
	290.001	1.03026	1.25176		58	1.06944	1.24518	2.03035	2.27071
	295.001	1.03663	1.25355		59	1.36309	1.16318	1.4092	2.50675
	300.001	1.03645	1.2511		60	1.17491	1.13763	1.67539	1.68206
	305.001	1.03685	1.2387		61	1.30586	1.13663	1.36717	1.63971
	310.001	1.04268	1.22568		62	1.30345	1.31705	1.36281	2.6949
	315.001	1.04399	1.21102		63	1.214	1.31011	1.37186
	320.001	1.04299	1.19625		64	1.24628	1.30142	1.29829
	325.001	1.03894	1.17982		65	1.30243	1.3365	1.04692
	330.001	1.03182	1.1665		66	1.12553	1.42604	1.24077
	335.001	1.02466	1.15407		67	1.27475	1.35757	1.44002
	340.001	1.01572	1.14187		68	1.36158	1.28887	1.03276
	345.001	1.01569	1.13217		69	1.30659	1.27676	1.17571
	350.001	1.00864	1.11979		70	1.05343	1.16435	1.23355
	355.001	1.00593	1.11325		71	1.12609	1.35967	1.60915
	360.001	1.00193	1.10334		72	1.15084	1.24842	1.29266
	365.001	0.993808	1.09605		73	1.30822	1.85702	1.33612
	370.001	0.98534	1.08643		74	1.1654	1.79992	1.2395
	375.002	0.982259	1.07524		75	1.10451	1.48247	1.08899
	380.002	0.973843	1.06197		76	1.27958	1.47741	1.19338
	385.002	0.973869	1.0512		77	1.08158	1.52929	1.24257
	390.002	0.964611	1.03806		78	1.11421	1.39211	1.27169
	395.002	0.95762	1.02592		79	1.12117	1.35487	1.39485
	400.002	0.94902	1.01628		80	1.25364	1.2868	1.13699
	405.002	0.937965	1.00655		81	1.17683	1.49064	1.10146
	410.003	0.933464	0.992124		82	1.092	1.44532	1.39633
	415.003	0.923188	0.978886		83	1.34667	1.41744	1.19981
	420.003	0.911251	0.968261		84	1.21122		1.55951
	425.003	0.901328	0.956817		85	1.14637		1.32095
	430.003	0.893784	0.946023		86	1.02894		1.29211
	435.003	0.886564	0.936426		87	1.09634		1.19426
	440.003	0.882257	0.927499		88	1.02691		1.45515
	445.003	0.879613	0.917485		89	1.10955		1.64199
	450.003	0.871298	0.912652		90	1.08628		1.6952
	455.003	0.866702	0.903495		91	1.10364		1.57653
	460.003	0.859563	0.896727		92	1.19098		1.29669
	465.003	0.852437	0.892765		93	1.04863		1.97453
	470.003	0.846851	0.886674		94	1.10464		2.28133
	475.003	0.836148	0.881846		95	1.0852		2.22627
	480.003	0.822803	0.874479		96	1.16969		1.27413
	485.003	0.823749	0.866799		97	1.13248		1.71818
	490.003	0.819058	0.860393		98	1.24123		1.97538
	495.003	0.816395	0.853815		99	1.04168		2.31777
	500.003	0.810187	0.841475		100	1.10474		1.71597
	505.003	0.808757	0.820447		101	1.01584		2.21713
	510.003	0.812649	0.800917		102	1.05895		1.53558
	515.003	0.821288	0.782091		103	1.07729		1.34145
	520.003	0.835983	0.779842		104	1.59179		2.31586
	525.003	0.843144	0.787136		105	1.30226		1.07919
	530.003	0.859337	0.815583		106	1.53323		1.15892
	535.003	0.88319	0.856412		107	1.65135		1.18217
	540.003	0.892529	0.9043		108	1.49673		1.24353
	545.003	0.904522	0.967489		109	1.42011		1.16282
	550.003	0.927985	1.03663		110	1.58596		1.18137
	555.003	0.946468	1.1145		111	1.26007		1.21868
	560.003	0.969633	1.19888		112	1.16432		1.08468
	565.003	0.996475	1.28845		113	1.48307		1.08613
	570.003	1.02987	1.37437		114	1.75879		1.18367
	575.003	1.05399	1.46148		115	1.33268		1.30244
	580.003	1.0711	1.5398		116	1.32296		1.07431
	585.003	1.09892	1.60774		117	1.53584		1.08196
	590.003	1.11939	1.66307		118	1.41633		1.13238
	595.003	1.13485	1.71209		119	1.37118		1.16862
	600.003	1.15334	1.74124		120	1.23903		1.16928
	605.003	1.16902	1.75831		121	1.55472		1.06445
	610.003	1.17842	1.74841		122	1.42772		1.20243
	615.003	1.18911	1.73129		123	1.59203		1.12177
	620.003	1.20702	1.7125		124	1.3302		1.18967
	625.004	1.22043	1.69615		125	1.30441		1.11033
	630.004	1.22724	1.68526		126	1.5488		1.16943
	635.005	1.23148	1.67518		127			1.23862
	640.005	1.23551	1.671		Average	1.23836	1.35081	1.44734	2.43901
	645.005	1.23596	1.66413		SD	0.189155	0.19627	0.307214	0.887201
	650.005	1.24027	1.65711		SE	0.0168513	0.0215435	0.0272608	0.112675
	655.005	1.23988	1.64955		N	126	83	127	62
	660.005	1.23499	1.6468		p value	Unpaired t test	p< 0.0001	Unpaired t test	p< 0.0001
	665.005	1.22833	1.64868
	670.005	1.23106	1.65215
	675.005	1.22365	1.65757
	680.005	1.21943	1.65949
	685.005	1.20562	1.65541
	690.005	1.1893	1.6511
	695.005	1.17949	1.64803
	700.005	1.16973	1.64912
	705.005	1.15173	1.65578
	710.005	1.14256	1.646
	715.005	1.14294	1.64774
	720.005	1.13542	1.64194
	725.005	1.1243	1.63859
	730.005	1.1193	1.62909
	735.005	1.11102	1.62718
	740.005	1.09807	1.62571
	745.005	1.08859	1.62087
	750.005	1.14676	1.6147
	755.005	1.14271	1.60957
	760.006	1.13452	1.60174
	765.006	1.13667	1.59373
	770.006	1.1428	1.59294
	775.006	1.14516	1.58938
	780.007	1.11952	1.58424
	785.007	1.10936	1.58151
	790.007	1.11523	1.57638
	795.008	1.1154	1.56907
	800.008	1.10023	1.57285
	805.008	1.11138
	810.008	1.11838
	815.008	1.13496
	820.008	1.12771
	825.008	1.12102
	830.008	1.11971
	835.008	1.10885
	840.008	1.11014
	845.008	1.10832
	850.008	1.10396
	855.008	1.12039
	860.009	1.12804
	865.009	1.1308
	870.009	1.124
	875.009	1.12205
	880.009	1.13009
	885.009	1.13314
	890.009	1.12716
	895.009	1.11947
