# Supplementary material for: Defective STIM-mediated store operated Ca2+ entry in hepatocytes leads to metabolic dysfunction in obesity
Source: eLife. 2017 Dec 15;6:e29968. doi: 10.7554/eLife.29968 (PMC5777820; doi:10.7554/eLife.29968)
Supplement: Figure 5—figure supplement 1—source data 1. [file elife-29968-fig5-figsupp1-data1.xlsx]

## Sheet: Figure5 S1A and B and C
		mRNA leavels measured by qPCR normalized by 18S
			ATGL		HSL		LPL
			adGFP	adSTIM1-YFP	adGFP	adSTIM1-YFP	adGFP	adSTIM1-YFP
		1	0.74	1.39	0.84	1.27	0.32	1.11
		2	1	1.63	1	1.47	1	1.71
		3	0.9	1.97	0.78	1.15	0.56	1.83
		4	1.13	1.85	1.21	1.07	1.08	1.06
		5	0.99	1.28	0.95	0.9	0.92	1.49
		6	0.7	0.76	0.65	1.11	0.29	0.83
		7	1	0.9	1	1.36	1	1.28
		8	1.19	0.88	0.68	0.91	1.01	1.46
		9	0.87	0.85	0.82	0.92		1.07
		Average	0.946667	1.27889	0.881111	1.12889	0.7725	1.31556
		SD	0.162788	0.460338	0.17702	0.205514	0.329274	0.330988
		SE	0.0542627	0.153446	0.0590067	0.0685048	0.116416	0.110329
		N	9	9	9	9	8	9
			p-value	0.058	*p-value	0.014	p-value	0.0041
			PGC1alpha		PPARalpha		CPT1		SLC25a20
			adGFP	adSTIM1-YFP	adGFP	adSTIM1-YFP	adGFP	adSTIM1-YFP	adGFP	adSTIM1-YFP
		1	0.46	0.94	0.67	0.74	0.89	2.56	0.85	1.07
		2	1	1.28	1	1.02	1	3.28	1	1.25
		3	1.16	1.49	1.05	0.99	0.89	4.63	0.95	1.29
		4	1.4	0.95	0.6	0.9	4.06	2.69	1.05	1.31
		5	0.92	0.34	0.99	1.04	1.49	6.08	0.96	0.38
		6	1	0.59	1	1.09	1.36	2.36	0.42	0.66
		7	0.64	0.56	1.25	1.1	0.21	2.2	0.68	0.66
		8	1.31	0.5	0.89	0.93	0.94	2.19	0.85	1.15
		9	0.49	0.86	0.93	1.1		1.28		0.86
		Average	0.931111	0.834444	0.931111	0.99	1.355	3.03	0.845	0.958889
		SD	0.340347	0.378289	0.196306	0.118216	1.1574	1.4649	0.206398	0.333558
		SE	0.113449	0.126096	0.0654354	0.0394053	0.409202	0.488299	0.0687992	0.111186
		N	9	9	9	9	8	9	8	9
							*p-value	0.02	*p-value
			SCD1		FAS		SREBPc
			adGFP	adSTIM1-YFP	adGFP	adSTIM1-YFP	adGFP	adSTIM1-YFP
		1	0.76	0.7	0.84	0.9	1.21	1.46
		2	1.01	0.44	1	1.07	0.8	2.25
		3	1	0.6	0.6	1.16	0.88	2.91
		4	1.13	0.92	1.45	1.02	1	2.29
		5	1	1.28	1	1.61	1.91	1.08
		6	1.41	1.23	1.62	1.38	0.9	0.78
		7	0.43	1.14	0.36	2.01	1	0.78
		8	0.86	0.72	1.37	1.34	0.8	0.87
		9		0.7		1.23		0.69
		Average	0.95	0.858889	1.03	1.30222	1.0625	1.45667
		SD	0.284655	0.297928	0.432897	0.339845	0.367491	0.823529
		SE	0.0948851	0.0993093	0.153052	0.113282	0.129928	0.27451
		N	8	9	8	9	8	9
