# Supplementary material for: Defective STIM-mediated store operated Ca2+ entry in hepatocytes leads to metabolic dysfunction in obesity
Source: eLife. 2017 Dec 15;6:e29968. doi: 10.7554/eLife.29968 (PMC5777820; doi:10.7554/eLife.29968)
Supplement: Figure 5—source data 1. [file elife-29968-fig5-data1.xlsx]

## Sheet: Figure 5B
		mRNA expression levels measured by qPCR normalized by 18S
			STIM2		Orai1		Itpr1		SERCA
			AdGFP	AdSTIM1-YFP	AdGFP	AdSTIM1-YFP	AdGFP	AdSTIM1-YFP	AdGFP	AdSTIM1-YFP
		1	0.57	1.05	0.68	0.91	0.9	1.14	1	1.7
		2	1	1.32	1	1.52	1	1.08	1.22	1.76
		3	0.8	1.53	0.85	1.11	0.87	1.19	0.98	2.19
		4	1.06	1.15	1	2.02	1.35	1.03	1.56	1.46
		5	1	1.05	1	1.07	1	1.05	1	1.21
		6	1.35	1.19	1.37	1.43	0.96	0.9	1.36	1.52
		7	0.82	1.71	0.8	1.23	0.62	0.92	0.88	1.31
		8	1.06	1.36	0.95	0.99	0.96	0.92	1.74	1.37
		9	1.96	1.34	1.28	1.27	0.74	0.93	1.11	1.48
		10		1.36		1.13		0.88		1.09
		Average	1.06889	1.306	0.992222	1.268	0.933333	1.004	1.20556	1.509
		SD	0.397789	0.208017	0.218562	0.324099	0.201432	0.10926	0.292793	0.314553
		SE	0.132596	0.0657808	0.0728541	0.102489	0.0671441	0.0345511	0.0975977	0.0994703
		N	9	10	9	10	9	10	9	10
					Unpaired t test				Unpaired t test
		P value				* p=0.0464				*p=0.0446

## Sheet: Figure 5C
	Western Blot quantification
		SERCA A.U.
		AdGFP	AdSTIM1-YFP
	1	5142.01	8956.43
	2	5173.26	11862.4
	3	5686.01	11913.5
	4		11072.3
		Tubulin A.U.
		AdGFP	AdSTIM1-YFP
	1	7064.5	8300.62
	2	8814.62	9489.33
	3	7169.08	9228.79
	4		8560.67
		SERCA/Tubulin ratio
		AdGFP	AdSTIM1-YFP
	1	0.727867	1.07901
	2	0.586895	1.25008
	3	0.79313	1.29091
	4		1.29339
	SERCA/tubulin normalized by control
		AdGFP	AdSTIM1-YFP
	1	1.01	1.5
	2	0.82	1.74
	3	1.1	1.79
	4		1.8
	Average	0.976667	1.7075
	SD	0.142945	0.140801
	SE	0.0825295	0.0704006
	N	3	4
		Unpaired t test
	P value		*p=0.0011

## Sheet: Figure 5D
	Glucose tolerance test
	Time (min)	adGFP							Average	SD	SE	N
	0	93	85	97	111	96	151	119	107.429	22.3447	8.4455	7
	15	377	544	431	571	431	415	286	436.429	96.919	36.6319	7
	30	598	639	532	749	543	486	404	564.429	111.171	42.0186	7
	60	521	405	738	495	439	271	291	451.429	157.831	59.6545	7
	90	415	275	800	326	307	214	202	362.714	205.768	77.7731	7
	120	359	243	800	320	282	275	204	354.714	202.624	76.5848	7
	Time (min)	adSTIM1-YFP											Average	SD	SE	N
	0	186	125	83	82	97	101	74	91	97	141	160	112.455	36.0343	10.8648	11
	15	653	319	287	542	443	342	267	378	303	137	351	365.636	139.599	42.0907	11
	30	n.d.	305	700	526	281	350	437	450	365	476	502	439.2	123.59	37.2637	11
	60	548	218	165	349	153	218	159	388	297	407	411	301.182	129.837	39.1472	11
	90	294	178	112	248	135	214	131	254	226	272	270	212.182	63.7131	19.2102	11
	120	360	184	113	250	152	224	158	199	238	202	253	212.091	65.7411	19.8217	11
		Area Under the Curve
			adGFP	adSTIM1-YFP
		1	53273	55755
		2	47220	27225
		3	77303	30683
		4	55680	42240
		5	46013	24615
		6	36968	30083
		7	32123	25463
		8		38723
		9		32745
		10		37223
		11		41985
		Average	49797.1	35158.2
		SD	14726.3	9260.98
		SE	5566.02	2792.29
		N	7	11
			Unpaired t test
		P value		*p=0.019

## Sheet: Figure 5E
		Western Blot quantification
			pAKT		pAKT
			AdGFP PBS	AdGFP Insulin	AdSTIM1-YFP PBS	AdSTIM1-YFP Insulin
		1	818.749	10084	2222.86	12732.1
		2	346.607	9208.75	577.263	12993.4
		3		9797.22		14475.9
		4				14898.4
		Western Blot quantification
			AKT		AKT
			AdGFP PBS	AdGFP Insulin	AdSTIM1-YFP PBS	AdSTIM1-YFP Insulin
		1	12674.8	12423.5	12354.4	12317.2
		2	12868.2	12115.2	11073	12522.6
		3		12293.9		13588.2
		4				13128
		Western Blot quantification
			pAKT/AKT		pAKT/AKT
			AdGFP PBS	AdGFP Insulin	AdSTIM1-YFP PBS	AdSTIM1-YFP Insulin
		1	0.0645965	0.811689	0.179925	1.03369
		2	0.0269351	0.760097	0.0521323	1.0376
		3		0.796914		1.06533
		4				1.13486
		Average	0.0457658	0.789567	0.116028	1.06787
		SD	0.0266306	0.0265694	0.0903628	0.0468287
		SE	0.0153752	0.0153399	0.052171	0.0234144
		N	2	3	2	4
					Unpaired t test
		P value				*p=0.0003

## Sheet: Figure 5F and G
		mRNA leavels measured by qPCR normalized by 18S
			GCK		Hxk2		Hxk3		Pyr Kinase		GPI		Pgm1		Pgm2
			adGFP	adSTIM1-YFP	adGFP	adSTIM1-YFP	adGFP	adSTIM1-YFP	adGFP	adSTIM1-YFP	adGFP	adSTIM1-YFP	adGFP	adSTIM1-YFP	adGFP	adSTIM1-YFP
		1	1	1.01	1	2.04	0.8	1.96	1	3.28	1	1.79	0.46	1.72	0.67	0.71
		2	0.83	1.15	1.98	2.78	1	1.38	2.24	3.26	1.53	2.14	1	1.56	1	0.76
		3	0.72	1.04	1.21	2.28	0.83	2.15	1.8	4.21	1.19	1.82	0.97	1.68	1.1	1.53
		4	1.08	1.01	1.76	1.44	0.65	0.98	2.86	2.12	1.82	2.04	1.02	1.81	0.65	1.24
		5	0.55	1.18	1.34	11.39	0.54	3.12	1.65	4.46	1.55	2.04	0.59	4.15	0.45	0.72
		6	0.66	1.08	1	7.27	1	3.9	1	3.15	1	1.71	1	1.72	1	1.04
		7	1	0.7	3.72	6.1	1.75	5.09	3.12	3.89	2.28	2.57	2.43	2.61	1.15	1.05
		8	0.65	1.28	1.34	6.86	1	3.66	1.45	4.33	0.73	1.43	0.97	3.68	0.57	1.4
		9	1.16	0.72	3.22	10.2	1.64	4.03	2.1	3.52	2.07	1.71	2.22	4.41	0.92	0.75
		Average	0.85	1.01889	1.84111	5.59556	1.02333	2.91889	1.91333	3.58	1.46333	1.91667	1.18444	2.59333	0.834444	1.02222
		SD	0.217198	0.195796	0.985703	3.67873	0.413854	1.37562	0.746576	0.73675	0.526308	0.326879	0.679064	1.01649	0.252741	0.312401
		SE	0.0723994	0.0652654	0.328568	1.22624	0.137951	0.458541	0.248859	0.245583	0.175436	0.10896	0.226355	0.338831	0.0842468	0.104134
		N	9	9	9	9	10	9	9	9	9	9	10	10	9	9
			p-value	0.1024	*p-value	0.0093	p-value	0.0011	*p-value	0.0002	#p-value	0.0433	*p-value	0.0063	*p-value	0.18
			Pck1		G6PC
			adGFP	adSTIM1YFP	adGFP	adSTIM1YFP
		1	1	0.56	0.84	1.62
		2	0.84	0.46	0.96	2.08
		3	0.91	0.7	1	1.69
		4	0.98	0.57	1.33	0.81
		5	0.89	0.53	1.44	0.55
		6	1	0.92	1	1.05
		7	1.44	0.47	0.78	0.78
		8	1.55	0.29	0.46	0.62
		9	0.44	0.75	0.7	0.68
		Average	1.00556	0.583333	0.945556	1.09778
		SD	0.327036	0.184526	0.302701	0.556457
		SE	0.109012	0.0615088	0.1009	0.185486
		N	9	9	9	9
			*p-value	0.0039	p-value	0.4814
									s

## Sheet: Figure 5H
		TG (ug/mg tisuse)
		AdGFP	AdSTIM1-YFP
	1	49.89	51.84
	2	48.51	45.45
	3	64.84	38.41
	4	56.17	63
	5	70.59	47.13
	6	67.1	37.67
	7	103.09	76.16
	8	81.56	76.03
	9	91.13	89.76
	10	76.14	55.248
	11	116.94	78.4565
	12	73.1708	79.333
	13	51.6977	54.3223
	14	81.1297	61.7637
	15		49.7756
	16		70.5177
	17		44.0364
	Mean	73.7113	59.9355
	SD	20.1629	15.9368
	SE	5.38877	3.86524
	N	14	17
		*p=0.042
		3 cohorts pooled
