# Supplementary material for: Defective STIM-mediated store operated Ca2+ entry in hepatocytes leads to metabolic dysfunction in obesity
Source: eLife journal article supplement (doi:10.7554/elife.29968), 2017-12-15
Supplement: supp [file elife_poa_e29968_Figure_1_figure_supplement_1_and_2_source_data_1.xlsx]

## Sheet: Fig 1S1A
	mRNA expression levels (qPCR) in livers from Wt and ob/ob mice normalized by 18S
		STIM1		STIM2		ORAI1
		WT	ob/ob	WT	ob/ob	WT	ob/ob
	1	0.77	1.78	0.92	1.07	1.15	1.9
	2	0.45	1.32	0.96	0.77	0.86	1.35
	3	1.07	1.17	1.4	0.95	1.45	1.3
	4	1	1.355	1		1
	5	1.612	1.321
	6	0.939	1.121
	7	0.978	1.211
	8	0.832
	Average	0.956375	1.32543	1.07	0.93	1.115	1.51667
	SD	0.327773	0.218557	0.222411	0.150997	0.252784	0.332916
	SE	0.115885	0.0772714	0.111206	0.087178	0.126392	0.192209
	N	8	7	4	3	4	3
	Unpaired t test between Wt and ob/ob
	P value	*p=0.0255
	mRNA expression levels (qPCR) in livers from lean and HFD mice normalized by 18S
		STIM1		STIM2		ORAI1
		WT	ob/ob	WT	ob/ob	WT	ob/ob
	1	1	1.3	1	1.71	1	1.18
	2	0.82	1.19	0.49	1.88	1.5	1.11
	3	0.5	1.96	0.09	2.49	0.59	1.45
	4	1.135	1.258
	5	1.084	1.57
	6	1.061	1.552
	7	0.767	1.476
	8
	Average	0.909571	1.47229	0.526667	2.02667	1.03	1.24667
	SD	0.226734	0.261109	0.456107	0.410163	0.455741	0.179536
	SE	0.0856974	0.0986899	0.263333	0.236807	0.263122	0.103655
	N	7	7	3	3	3	3
	Unpaired t test between Lean and HFD			Unpaired t test between Lean and HFD
	P value	*p=0.0010			#p=0.0133

## Sheet: Fig 1S1B
	Quantification of Western blot A.U
		STIM1		b-tubulin		Ratio STIM1/tubulin		Ratio STIM1/tubulin normalized by control
		Lean	HFD	Lean	HFD	Lean	HFD	Lean	HFD
	1	6322.45	8272.74	15690.8	8580.08	0.40294	0.96418	1.00735	2.41045
	2	7204.15	9096.74	13832.7	10767.7	0.520805	0.844821	1.30201	2.11205
	3	7450.74	7412.91	9919.49	16578.1	0.751121	0.447152	1.8778	1.11788
	4		4352.08		13847.8		0.31428		0.7857
	Average					0.558289	0.642608	1.39572	1.60652
	SD					0.177091	0.311074	0.442728	0.777685
	SE					0.102244	0.155537	0.255609	0.388842
	N					3	4	3	4
	Quantification of Western blot A.U.
		STIM2		b-tubulin		Ratio STIM2 /tubulin		Ratio STIM1/tubulin normalized by control
		Lean	HFD	Lean	HFD	Lean	HFD	Lean	HFD
	1	6124.93	10571.2	15690.8	8580.08	0.390352	1.23206	1.0009	3.15913
	2	7879.76	9153.05	13832.7	10767.7	0.569646	0.85005	1.46063	2.17962
	3	8388.76	7924.93	9919.49	16578.1	0.845685	0.478037	2.16842	1.22574
	4		9679.76		13847.8		0.699012		1.79234
	Average					0.601894	0.81479	1.54332	2.08921
	SD					0.229373	0.317367	0.588135	0.813762
	SE					0.132428	0.158684	0.33956	0.406881
	N					3	4	3	4

## Sheet: Fig 1S1E
		Histogram of pixel intensities in images derived from WT animals
		0-500			500-1000			1000-1500			1500-2000			>2000
		WT NT	WT TG10min	WT TG30min	WT NT	WT TG10min	WT TG30min	WT NT	WT TG10min	WT TG30min	WT NT	WT TG10min	WT TG30min	WT NT	WT TG10min	WT TG30min
	1	17334	13444	10574	694	1687	2082	58	311	775	2	101	406	0	82	1788
	2	8497	5186	12807	4222	3696	2054	1767	2484	470	687	1477	175	452	2782	119
	3	11026	7280	12206	3351	4315	2290	874	1983	591	241	898	245	133	1149	293
	4	11768	8405	5935	2997	4198	3519	623	1540	1986	181	599	1219	56	883	2966
	5			9625			3373			1280			613			734
	6			5929			3546			2115			1126			2909
	7			7504			3772			1784			902			1663
	8			7098			3388			1710			1010			2419
	9			6442			3021			1872			1238			3052
	Average	12156.2	8578.75	8680	2816	3474	3005	830.5	1579.5	1398.11	277.75	768.75	770.444	160.25	1224	1771.44
	SD	3725.02	3507.06	2691.25	1505.4	1221.22	679.622	711.509	929.442	636.92	291.11	575.334	419.699	201.997	1133.35	1161.08
	SE	1862.51	1753.53	897.082	752.701	610.608	226.541	355.755	464.721	212.307	145.555	287.667	139.9	100.999	566.674	387.026
	N	4	4	9	4	4	9	4	4	9	4	4	9	4	4	9
														Unpaired t test between WT NT and WT Tg30
																*p= 0.02
		Histogram of pixel intensities in images derived from ob/ob animals
		0-500			500-1000			1000-1500			1500-2000			>2000
		obob NT	obob TG10min	obob TG30min	obob NT	obob TG10min	obob TG30min	obob NT	obob TG10min	obob TG30min	obob NT	obob TG10min	obob TG30min	obob NT	obob TG10min	obob TG30min
	1	9421	4905	9131	3725	3254	3767	1314	2150	1324	491	1393	607	674	3923	796
	2	7817	5277	6970	3361	3029	3039	1662	2040	1641	939	1356	990	1846	3923	2985
	3	5340	4973	6402	4014	2925	3427	2353	2146	2122	1403	1474	1188	2515	4107	2486
	4	8001	9814	6389	3413	3632	2773	1628	1119	1592	882	460	1018	1701	600	3853
	5		5543	10496		3984	3096		2480	871		1415	393		2203	769
	6		8085	9113		4028	3872		1640	1322		735	562		1137	756
	7			10107			3165			1035			491			827
	Average	7644.75	6432.83	8372.57	3628.25	3475.33	3305.57	1739.25	1929.17	1415.29	928.75	1138.83	749.857	1684	2648.83	1781.71
	SD	1695.44	2037.4	1752.41	303.27	477.451	401.43	438.129	479.89	416.237	373.644	429.945	308.651	760.963	1552.76	1303.52
	SE	847.719	831.767	662.347	151.635	194.918	151.726	219.064	195.914	157.323	186.822	175.524	116.659	380.481	633.913	492.683
	N	4	6	7	4	6	7	4	6	7	4	6	7	4	6	7

## Sheet: Fig 1S2B
									Quantification of the ration betwen STIM1 intensity in the edge/cytosol
		STIM1 translocation:		Fold change: Tg/non-treated cells					CHOW		3weeks		5weeks		7weeks		11weeks				Pixel intensities in the cell
		chow	3 wks	5wks	7wks	11wks			NT	TG	NT	TG	NT	TG	NT	TG	NT	TG			CHOW	3weeks	5weeks	7weeks	11weeks
		2.90501	3.75146	1.45238	0.72713	0.738414			1.79785	5.22278	2.27516	8.53516	4.54894	6.6068	1.69888	1.2353	2.14731	1.58561			NT	NT	NT	NT	NT
		3.78272	3.7425	1.60698	1.36737	0.489943			1.48176	5.60508	1.8266	6.83605	2.29092	3.68146	1.64676	2.25173	1.44802	0.709445			7	34	7	161	97
		2.26518	1.04836	2.77915	1.01134	0.561586			0.765585	8.55724	3.56078	3.73297	2.11131	5.86764	1.58166	1.5996	1.83575	1.03093			0	131	58	213	80
		1.63302	4.22846	1.84564	0.837451	0.826764			1.79851	4.07395	1.95719	8.27591	3.37483	6.22872	2.14352	1.7951	1.50487	1.24417			11	64	15	145	130
		4.42692	5.3222	2.58741	0.681824	0.829646			1.67209	2.73056	1.79372	9.54653	1.93232	4.9997	1.89563	1.29248	1.67799	1.39214			0	105	21	573	70
		1.95565	2.66768	2.5061	0.972571	1.93991															0	39	81	318	185
		4.67875	2.65428	1.38353	0.878775	2.0344			1.50089	6.64433	2.79826	7.46484	2.472	6.19507	1.63879	1.59384	1.56957	3.04482			25	40	54	333	156
		5.20436	1.65751	2.29988	0.992115	1.3612			2.27277	4.44475	2.34185	6.21594	3.57596	4.94745	2.21466	1.94618	1.29436	2.63323			28	52	12	284	162
		4.05165	1.26288	1.60538	0.673793	0.824223			1.6288	7.62073	3.22638	5.34776	2.39235	5.50211	1.93958	1.92429	0.992902	1.35153			13	28	5	293	162
		4.69142	3.11476	3.79096	1.65931	1.15454			1.39655		3.23683	4.08774	2.90934	4.67059	2.82233	1.90166	1.66985	1.37633			0	21	42	479	269
		3.76225	1.8854	2.01171	1.22178	2.11792			1.19807	6.23519	2.14777	6.6898	1.75588	6.65649	1.31899	2.18861	1.08787	1.25599			4	41	20	286	129
		3.46359	1.80713	2.34863	1.482	1.28126															0	17	112	326	191
		2.11255	1.41312	1.86011	1.47396	1.25532			1.52031	6.15977	2.44066	4.60162	2.50092	5.03111	1.44349	1.76363	1.09795	2.32538			35	74	209	195	184
			3.1516	0.9025	1.65865	0.633435			1.24589	5.84499	1.93944	3.50482	2.41542	5.67294	1.47097	2.17997	1.49259	1.91239			1	18	182	125	108
			3.7676	2.40519	0.833574	0.893546			1.44835	5.44906	2.58868	3.65812	2.00646	3.73224	1.47788	2.17834	1.41298	1.77373			0	8	43	291	197
	Average	3.45639	2.765	2.09237	1.09811	1.12947			1.19617	4.14305	2.31103	7.28346	3.26773	2.94913	1.53337	2.54332	2.3395	1.48192			0	9	96		118
	SD	1.17888	1.24948	0.702121	0.350214	0.534974			1.69635	3.58363	1.5796	5.95132	1.37066	3.29671	1.49452	1.24579	1.53509	1.37167			0				113
	SE	0.326962	0.322615	0.181287	0.0904249	0.13813															0				428
	N	13	15	15	15	15			1.2382								1.78926				0				124
	p value	0.146	0.0008		p<0.0001	p<0.0001			1.54815								0.996038				0				40
	Unpaired t-test between CHOW and test-group								1.45988								1.14906				0				153
									1.47677								0.434857
									1.1093								1.51845			Average	6.2	45.4	63.8	287.286	154.8
								Average	1.47261	5.45108	2.4016	6.11547	2.595	5.06921	1.75473	1.84266	1.44971	1.63262		SD	10.8123	35.3408	62.8186	123.893	82.5486
								SD	0.313883	1.58445	0.585206	1.92519	0.817315	1.20163	0.394179	0.394841	0.428554	0.619689		SE	2.4177	9.12495	16.2197	33.1118	18.4584
								SE	0.0701864	0.423462	0.1511	0.497082	0.21103	0.31026	0.101776	0.101947	0.0958275	0.160003		N	20	15	15	14	20
								N	20	14	15	15	15	15	15	15	20	15		Unpaired t-test between CHOW and test-group
								p values			p<0.0001		p<0.0001		p=0.024			p=0.848				p<0.0001	p=0.0003	p<0.0001	p<0.0001
								Unpaired t-test between CHOW NT and test-group
								p values		p<0.0001		p<0.0001		p<0.0001		p=0.5466		p=0.3091
								Unpaired t-test between NT and TG

## Sheet: Fig 1S2C
	Body weight
	Wks HFD	0	3	5	7	11
		29.4	29	36.7	40.8	42.1
		27.6	28.6	32.7	42.4	37.2
	Body Glucose
	Wks HFD	0	3	5	7	11
		228	232	304	155	227
		198	285	192	227	176
	Insulin
	Wks HFD	0	3	5	7	11
		1.6	1.029	1.607	5.356	4.219
		0.799	1.229	3.012	4.216

## Sheet: Fig 1S3A
	STIM2 translocation: Edge/cytosol intensity ratio
		WT		ob/ob
		NT	TG	NT	TG
	1	0.760304	2.8321	2.56762	2.9307
	2	1.35365	4.00959	1.64152	2.1466
	3	1.95276	2.57674	1.70581	2.7537
	4	1.13477	3.49575	1.88622	1.28781
	5	1.2855	3.94405	0.88089	3.36629
	6	2.26489	2.86711	0.591522	2.54364
	7	1.43168	3.10388	0.789313	3.54745
	8	2.48911	2.32119	3.19734	3.4195
	9	1.93524	7.54037	2.1262	5.79657
	10	2.25459	7.14026	2.69552	3.10515
	11		2.90715	2.03031	2.62756
	12		3.76189	2.72952	4.16956
	13		7.28066	1.46764	3.29641
	14		6.7319	1.00466	3.09113
	15		6.32035	3.51936	6.4119
	16		4.51294	2.60434	1.52727
	17		7.26398	1.93721	2.24836
	18		5.0006	0.808717	2.59991
	19		8.46915	1.47501	3.79452
	20		7.01734	1.88526	1.50026
	21		3.53925	3.71776	4.65886
	22		5.23793	2.07507	5.56417
	23		6.22532	4.62381	2.93663
	24		13.9423	2.08154	0.923945
	25		6.39067	0.616654	1.46381
	26		11.1641	0.828117	0.671775
	27		20.3101	1.17076	0.753608
	28		5.73525	0.467505	4.06558
	29		4.92075	0.523605	0.980039
	30		3.65137	0.543709	2.77347
	31		3.86806		5.37695
	32				8.55797
	33				3.58537
	34				1.65746
	35				3.28776
	36				3.13125
	37				3.37055
	38				6.18946
	39				2.06083
	40				3.9799
	41				4.5003
	42				1.89811
	43				1.08224
	Average	1.68625	5.93814	1.80642	3.15429
	SD	0.570866	3.71017	1.06228	1.69162
	SE	0.180524	0.666367	0.193946	0.257969
	N	10	31	30	43
	Unpaired t test between:		p-value
	WT NT	WT TG	0.0009	*
	WT NT	ob/ob NT	0.7359
	ob/ob NT	ob/ob TG	0.0002	#
