# Supplementary material for: Defective STIM-mediated store operated Ca2+ entry in hepatocytes leads to metabolic dysfunction in obesity
Source: eLife journal article supplement (doi:10.7554/elife.29968), 2017-12-15
Supplement: supp [file elife_poa_e29968_Figure_2_source_data_1.xls]

## Sheet: Figure 2H and I
	Qantification of number of puncta per cell						Quantification STIM1 translocation (edge /cytosol)
		OGT -		OGT +				OGT -		OGT +
		DMSO	Tg	DMSO	Tg			DMSO	Tg	DMSO	Tg
	1	1	16	0	1		1	1.11806	4.06667	0.648371	1.02046
	2	0	3	0	2		2	0.620999	5.78477	1.24488	1.07961
	3	0.5	4	0.5	14		3	0.81211	3.33201	0.840784	0.87979
	4	4	12	11	22		4	0.979042	10.5006	1.64772	1.22365
	5	0	31	13	35		5	0.91213	4.54148	1.59034	1.13892
	6	4	77	0	15		6	1.46468	5.0968	0.888054	2.71069
	7	3.5	25	1	14		7	0.841876	4.43894	1.78904	1.65031
	8	4	25.5		4		8	1.18101	2.55656	1.10226	0.951763
	9	0	49		4		9	2.03847	1.38536	0.987552	2.02899
	10	7	59				10	1.13479	2.72755	0.771311	5.70704
	11	3	48				11	1.3995	2.11039	1.79808	0.739474
	12		44				12	0.273513	2.65857	2.31372	1.65596
	13		29				13	1.91179	1.43455	0.739691	1.26667
	14		9				14	2.48488	3.39661	0.876519	1.21402
	Average	2.45455	30.8214	3.64286	12.3333		15	1.50983	1.75023	1.01765	0.590011
	SD	2.3071	22.0747	5.74974	11.1467		16	0.619682	1.68461	0.889294	1.89487
	SE	0.695618	5.89971	2.1732	3.71558		17	1.71132	2.37193	1.51088	1.67803
	N	11	14	7	9		18	0.948454	1.34648	0.991831	1.80054
							19	2.12157	1.48653	0.647155	0.887539
							20	1.44679	2.51306	0.91809	1.90586
							21	0.839782	3.04841	0.998386	0.464351
	Unpaired t test between:		p-value				22	0.53647	4.45099	0.867624	1.14862
	OGT-, DMSO	OGT-, TG	0.0003	*			23	0.45839	4.93294		0.592936
	OGT+, DMSO	OGT+, TG	0.0827				24	1.42	3.16224		0.898445
	OGT-, DMSO	OGT+, DMSO	0.5441				25	1.82784	1.64006		1.89554
	OGT-, TG	OGT+, TG	0.0307	#			26	1.0027	0.654878		1.26602
							27	1.75184	1.72544		1.03901
							28	1.31821	2.73114		3.02391
							29	2.28416	1.68191		2.19682
							30	0.721192	1.25796		1.63943
							31	1.07852	2.25676
							32	0.61228	0.731126
							33	1.89006	1.84683
							34	0.588645	2.92863
							35	2.1456	3.60517
							36	1.1846	1.94355
							37	0.723941	1.66063
							38	0.347496	2.11206
							39	0.453455	1.73072
							40	1.53975	1.03734
							41	0.491094	2.10413
							42	1.25241	1.41022
							43	3.09814	1.31608
							44	4.31225	2.20408
							45	3.56879	2.19806
							46	3.27984	2.08138
							47	2.76917	1.04996
							48	2.06212	1.20384
							49	2.87785	1.06018
							50	1.57778	1.23019
							51	0.98257	1.29461
							52	0.641632	1.13845
							53	0.693857	2.23254
							54	1.38944	6.52661
							55	0.844597	3.78359
							56	1.18827	7.60085
							57	1.56614	6.90731
							58	1.57966	0.600706
							59	1.20095	0.546311
							60	1.36176	2.03235
							61	1.00032	1.93043
							62	1.44196	1.19337
							63	2.09264
							64	1.15559
							Average	1.41694	2.61238	1.13996	1.53964
							SD	0.818153	1.86496	0.442515	0.995428
							SE	0.102269	0.236851	0.0943444	0.181739
							N	64	62	22	30
							Unpaired t test between:		p-value
							OGT-, DMSO	OGT-, TG	<0.0001	*
							OGT+, DMSO	OGT+, TG	0.0851
							OGT-, DMSO	OGT+, DMSO	0.5441
							OGT-, TG	OGT+, TG	0.0041	#

## Sheet: Figure 2J
	Representative traces of cytosolic calcium measurments				Quantification of SOCE
	Time (sec)	pcDNA + DMSO	pcDNAOGT+PugNac			pcDNA+DMSO	pcDNAOGT+PugNac
	75	1.0575	1.05433		1	3.088	3.25
	80	1.0422	1.05867		2	1.975	2.62
	85	1.0408	1.04233		3	4.401	4.15
	90	1.0462	1.053		4	1.73	3.84
	95	1.0441	1.02433		5	4.752	2.87
	100	1.0357	1.01633		6	2.288	3.29
	105	1.0448	1.011		7	2.261	2.85
	110	1.0355	1.02667		8	3.813	1.83
	115	1.0188	1.01267		9	2.418	2.97
	120	1.0141	1		10	2.818	3.07
	125	1.0139	0.987		11	3.69	3.67
	130	1.0054	0.999667		12	4.483	3.62
	135	1.0023	1.19167		13	2.541	3.31
	140	0.9924	1.48967		14	3.713	4.3
	145	1.0053	1.83167		15	3.548	2.43
	150	1.0368	2.18033		16	1.645	4.62
	155	1.0579	2.35867		17	1.642	3.17
	160	1.1168	2.445		18	2.835	2.63
	165	1.2058	2.48033		19	4.595	4.08
	170	1.3163	2.52233		20	3.195	4.29
	175	1.5122	2.46733		21	2.868	4.86
	180	1.8677	2.461		22	2.106	2.93
	185	2.0393	2.44333		23	3.146	2.44
	190	2.3594	2.40867		24	2.27	1.554
	195	2.5271	2.40367		25	3.502	1.095
	200	2.6462	2.346		26	1.843	2.236
	205	2.6965	2.334		27	2.653	2.188
	210	2.7378	2.27833		28	4.114	2.153
	215	2.7321	2.23433		29	2.063	1.673
	220	2.727	2.18533		30	1.38	1.477
	225	2.7045	2.169		31	3.077	1.317
	230	2.6668	2.11833		32	3.142	1.269
	235	2.6264	2.064		33	2.142	1.297
	240	2.5946	2.028		34	4.568	2.011
	245	2.5821	2.00667		35	2.798	1.732
	250	2.5566	1.94167		36	3.303	1.942
	255	2.5228	1.90567		37	3.021	1.78
	260	2.4733	1.86		38	2.252	2.776
	265	2.4099	1.78867		39	4.754	2.038
	270	2.3811	1.71567		40	4.928	2.882
	275	2.331	1.663		41	4.173	4.397
	280	2.2838	1.627		42	5.499	3.605
	285	2.2254	1.54833		43	3.138	1.744
	290	2.1974	1.50433		44	4.959	2.657
	295	2.1318	1.42867		45	6.716	2.132
	300	2.0777	1.37		46	3.065	2.577
	305	2.005	1.347		47	6.231	1.559
	310	1.9516	1.273		48	3.537	2.013
	315	1.8753	1.23133		49	6.205	2.333
	320	1.8266	1.17233		50	3.503	3.344
	325	1.771	1.09867		51	5.391	2.119
	330	1.6998	1.036		52		1.974
	335	1.6143	0.997		53		2.787
	340	1.5253	0.894		54		5.152
	345	1.4783	0.863		55		2.315
	350	1.4329	0.812		56		2.512
	355	1.3496	0.798		57		2.028
	360	1.3051	0.78		58		3.151
	365	1.201	0.758333		59		2.039
	370	1.148	0.752		60		1.355
	375	1.098	0.716		61		2.312
	380	1.0714	0.689667		Average	3.40741	2.66582
	385	1.0302	0.684333		SD	1.28141	0.972791
	390	0.9885	0.674		SE	0.179434	0.124553
	395	0.9455	0.671333		N	51	61
	400	0.9008	0.659333
	405	0.8686	0.640333		Unpaired t test between:		p-value *
	410	0.8414	0.644333		pcDNA+DMSO	pcDNAOGT+PugNac	0.0007
	415	0.8075	0.618333
	420	0.7785	0.626333
	425	0.7498	0.618
	430	0.73	0.618
	435	0.7067	0.611
	440	0.6958	0.595333
	445	0.6754	0.603
	450	0.6455	0.595333
	455	0.6355	0.607
	460	0.6276	0.592
	465	0.6213	0.593333
	470	0.6082	0.594667
	475	0.6024	0.594333
	480	0.5953	0.593
	485	0.5889	0.585
	490	0.5899	0.589667
	495	0.5794	0.583
	500	0.5772	0.585667
	505	0.5757	0.579
	510	0.5689	0.579333
	515	0.5652	0.575
	520	0.5652	0.577333
	525	0.5649	0.579
	530	0.567	0.572333
	535	0.5713	0.573333
	540	0.5718	0.58
	545	0.5668	0.571333
	550	0.5665	0.567333
	555	0.5704	0.571333
	560	0.5756	0.570667
	565	0.5765	0.568
	570	0.5767	0.565333
	575	0.5812	0.573
	580	0.5864	0.564667
	585	0.5816	0.570667
	590	0.5831	0.558667
	595	0.584	0.561667
	600	0.5814	0.558333
	605	0.5776	0.557333
	610	0.5777	0.564667
	615	0.5852	0.559333
	620	0.5835	0.555
	625	0.5793	0.549333
	630	0.5832	0.562333
	635	0.5861	0.549667
	640	0.5809	0.556667
	645	0.5799	0.552667
	650	0.5735	0.548
	655	0.5788	0.559333
	660	0.5741	0.553667
	665	0.5725	0.546333
	670	0.5702	0.548
	675	0.573	0.548667
	680	0.5809	0.540333
	685	0.5779	0.538333
	690	0.5765	0.546333
	695	0.5767	0.543667
	700	0.5644	0.543
	705	0.5639	0.561
	710	0.5676	0.621
	715	0.5671	0.671333
	720	0.5629	0.704333
	725	0.6903	0.770667
	730	1.0194	0.871667
	735	1.5749	0.923
	740	1.7446	0.992333
	745	1.9132	1.06067
	750	2.0347	1.112
	755	2.1374	1.165
	760	2.2229	1.19333
	765	2.2829	1.199
	770	2.3125	1.23133
	775	2.3227	1.25167
	780	2.3334	1.25033
	785	2.3769	1.29033
	790	2.3586	1.29
	795	2.3683	1.30667
	800	2.3738	1.312
	805	2.3559	1.32567
	810	2.3388	1.33067
	815	2.3119	1.335
	820	2.3079	1.333
	825	2.2902	1.32233
	830	2.286	1.33867
	835	2.2487	1.32067
	840	2.241	1.33333
	845	2.2313	1.32567
	850	2.194	1.33033
	855	2.1791	1.325
	860	2.1606	1.323
	865	2.148	1.30533
	870	2.1166	1.28467
	875	2.0983	1.29867
	880	2.0608	1.273
	885	2.0823	1.28367
	890	2.0135	1.27367
	895	2.0069	1.25433
	900	1.9793	1.23967
	905	1.9709	1.24667
	910	1.9504	1.24133
	915	1.9251	1.26133
	920	1.8972	1.22533
	925	1.8748	1.32033
	930	1.8432	1.07067
	935	1.6466	0.991333
	940	1.4028	0.938
	945	1.242	0.832667
	950	1.0905	0.782667
	955	0.9065	0.711
	960	0.7665	0.668
	965	0.6767	0.658
	970	0.5989	0.617667
	975	0.5682	0.597667
	980	0.5406	0.577667
	985	0.506	0.569333
	990	0.4976	0.536333
	995	0.4847	0.527
	1000	0.4687	0.513667
	1005	0.4635	0.505333
	1010	0.4504	0.498
	1015	0.4487	0.493667
	1020	0.4497	0.49
	1025	0.4455	0.487333
	1030	0.4458	0.477
	1035	0.4479	0.473333
	1040	0.4432	0.473
	1045	0.4504	0.464667
	1050	0.4472	0.467
	1055	0.4521	0.467667
	1060	0.4487	0.461667
	1065	0.4436	0.455667
	1070	0.4511	0.461
	1075	0.4563	0.454333
	1080	0.4513	0.46
	1085	0.4564	0.452333
	1090	0.453	0.461
	1095	0.4547	0.454
	1100	0.4598	0.458
	1105	0.4575	0.454333
	1110	0.4613	0.457333
	1115		0.451333

## Sheet: Figure 2N
		shSCR		scOGT
		NT	TG	NT	TG
	1	4.06154	3.4738	2.31369	2.3095
	2	7.01942	5.03944	2.61327	6.12547
	3	2.46922	6.0227	3.90332	3.91179
	4	1.82309	1.45755	2.15086	5.15153
	5	5.12752	3.98681	4.85832	17.1579
	6	4.17149	1.03183	6.71824	4.52455
	7	1.91865	5.72875	4.5729	9.11128
	8	2.23624	5.99449	2.67752	9.01284
	9	4.46984	0.94562	3.37217	7.28521
	10	4.16798	0.507141	3.40642	6.83513
	11	2.45022	1.60317	9.60241	3.7688
	12	2.38266	1.86104	4.15462	5.6654
	13	2.04925	2.99202	1.14667	2.77824
	14	6.08687	8.56069	2.00911	2.80742
	15	3.4386	1.72046	1.27225	8.49599
	16	2.21284	2.63457	2.87067	7.14684
	17	3.23536	2.20741	5.13786	8.66786
	18	4.4954	1.03259	3.08955	4.43429
	19	1.18131	7.85084	3.85443	3.18457
	20	1.92686	3.39094	4.51986	7.29252
	21	3.53989	3.75114	1.95724	8.95526
	22	2.13376	8.26345	1.49789	3.75749
	23	2.24669	3.15977	1.96424	4.73108
	24	2.36016	2.03026	1.27642	6.35443
	25	1.74577	3.56915	1.29958	5.0212
	26	2.50325	3.33856	1.92878	8.44707
	27	1.58006	2.8402	1.05382	8.89067
	28	2.07194	3.31289	2.41277	9.25351
	29	2.45795	2.31815	2.63185	4.93889
	30	4.84824	0.652226	2.74866	6.24194
	31	3.61935	0.118293	3.10144	6.5179
	32	6.2479	4.01019	4.62811	4.99029
	33	1.15654	1.8719	3.24508	1.86885
	34	0.504712	1.47507	5.11102	2.04933
	35	4.64424	3.45946	7.74045	3.55424
	36	2.17898	2.31382	8.41531	2.39536
	37	2.41811	1.85942	3.31308	9.97709
	38	2.2172	2.71802	1.62706	2.46459
	39	3.21748	1.53133	1.90017	3.4012
	40	2.89449	2.62647	4.10924	1.115
	41	1.81827	1.39318	1.86618	11.3462
	42	0.485834	0.610158	4.14543	5.90218
	43	0.402617	1.99342	2.89711	14.7782
	44	1.01598	1.88891	3.88441	6.25076
	45	3.48432	2.57895	2.03371	3.15142
	46	0.81153	1.91136	2.03584	6.87763
	47	1.44306	0.84496	0.646018	9.21188
	48	0.353322	3.09839	1.28483	5.78919
	49	3.00863	3.54718	0.391086	3.72206
	50	1.65409	2.07491	4.75896	6.17628
	51	1.99525	3.66774	1.85159	7.01875
	52	0.788201	2.41629	0.903972	4.05861
	53	1.39435	3.09475	2.78149	4.58728
	54	1.45767	1.46752	2.216	4.23342
	55	2.10447	0.878636	4.0997	1.94065
	56	0.885291	1.62486	2.3648	2.87261
	57	1.0755	1.32743	1.44053	4.50777
	58	1.44387	2.82546	3.63627	3.91246
	59	3.84784	1.29742	1.89587	16.2839
	60	3.16653	6.00227	1.76055	8.5924
	61	1.26805	3.34109	2.74363	8.64761
	62	1.90777	4.43804	2.50788	6.45041
	63	0.97009	5.31746	1.70867	5.19199
	64	1.26256	5.28543	3.23496	2.17349
	65	0.553313	6.12485	0.946255	4.89426
	66	2.12183	5.04449	4.55129	5.36045
	67		3.18916	4.19263	3.01154
	68			1.65126	3.05933
	69			1.56776	5.33763
	70			2.37469	16.7205
	71			2.70212	8.92708
	72			2.51934	2.73758
	73			4.5983	8.69997
	74			3.48181	5.3273
	75			2.36523	7.82676
	76			3.28635	4.10201
	77			0.841944	3.75209
	78				8.32556
	79				8.13587
	80				3.44094
	Average	2.45805	2.99322	2.96591	6.04911
	SD	1.47047	1.88099	1.70583	3.32062
	SE	0.181002	0.229799	0.194398	0.371256
	N	66	67	77	80
	Unpaired t-test between shSCR TG and shOGT TG				p<0.0001
	Unpaired t-test between shSCR NT and TG				p<0.0001
