# Supplementary material for: Defective STIM-mediated store operated Ca2+ entry in hepatocytes leads to metabolic dysfunction in obesity
Source: eLife journal article supplement (doi:10.7554/elife.29968), 2017-12-15
Supplement: supp [file elife_poa_e29968_Figure_3_figure_supplement_1_and_2_source_data_1.xlsx]

## Sheet: Fig 3S1A
		STIM1		un-specific band		Ratio STIM1/unspecific band		Ratio STIM1/unspecific band normalized by control
		SCR shRNA	STIM1 shRNA	SCR shRNA	STIM1 shRNA	SCR shRNA	STIM1 shRNA	SCR shRNA	STIM1 shRNA
	1	20629.2	11632.2	21389.3	21867.9	0.964465	0.531933	1.00465	0.554097
	2	20446.7	10266.6	18755.2	18715.7	1.09019	0.548553	1.13561	0.57141
	3	20187.5	10321.8	19307	17017.2	1.04561	0.606548	1.08917	0.631821
	Average							1.07648	0.585776
	SD							0.0663978	0.0408049
	SE							0.0383348	0.0235587
	N							3	3
								Unpaired t test	*p=0.0005
		STIM2		un-specific band		Ratio STIM2/unspecific band		Ratio STIM2/unspecific band normalized by control
		SCR shRNA	STIM1 shRNA	SCR shRNA	STIM1 shRNA	SCR shRNA	STIM1 shRNA	SCR shRNA	STIM1 shRNA
	1	16473	16071	21389.3	21867.9	0.770151	0.734915	1.0002	0.954435
	2	16201.4	16640.3	18755.2	18715.7	0.863836	0.889108	1.12187	1.15469
	3	14893.6	16922.7	19307	17017.2	0.77141	0.994448	1.00183	1.29149
	Average							1.0413	1.13354
	SD							0.0697785	0.16952
	SE							0.0402866	0.0978726
	N							3	3

## Sheet: Fig 3S1B
		STIM2		un-specific band		Ratio STIM2/unspecific band		Ratio STIM2/unspecific band normalized by control
		SCR shRNA	STIM2 shRNA	SCR shRNA	STIM2 shRNA	SCR shRNA	STIM2 shRNA	SCR shRNA	STIM2 shRNA
	1	23389.2	10067.5	13649.9	14671	1.71351	0.686216	1.00205	0.401296
	2	19926.2	8211.95	11094.3	11545.6	1.79607	0.711262	1.05033	0.415943
	3	20241	9615.12	11220.2	13147.6	1.80397	0.731321	1.05496	0.427673									STIM2		STIM1
	Average							1.03578	0.414971									shSCR	shSTIM1	shSCR	shSTIM1
	SD							0.0293007	0.0132155								1	1.71351	0.686216	1.40862	1.45934
	SE							0.0169168	0.00762999								2	1.79607	0.711262	1.66767	1.76616
	N							3	3								3	1.80397	0.731321	1.38227	1.99287
								Unpaired t test	*p< 0.0001								Average	1.77119	0.7096	1.48619	1.73946
																	SD	0.050104	0.0225984	0.157721	0.267761
																	SE	0.0289276	0.0130472	0.0910604	0.154592
		STIM1		un-specific band		Ratio STIM1/unspecific band		Ratio STIM1/unspecific band normalized by control									N	3	3	3	3
		SCR shRNA	STIM2 shRNA	SCR shRNA	STIM2 shRNA	SCR shRNA	STIM2 shRNA	SCR shRNA	STIM2 shRNA
	1	19227.5	21410.1	13649.9	14671	1.40862	1.45934	0.823755	0.853417
	2	18501.7	20391.4	11094.3	11545.6	1.66767	1.76616	0.975245	1.03284
	3	15509.4	26201.4	11220.2	13147.6	1.38227	1.99286	0.808342	1.16542
	Average							0.869114	1.01723									STIM2	non spec
	SD							0.0922348	0.156585								1			1.71351
	SE							0.0532518	0.0904046								2			1.79607
	N							3	3								3			1.80397
																	4			0.686216
																	5			0.711262
																	6			0.731321
																		STIM1	non spec
																	1		13649.9	1.40862
																	2		11094.3	1.66767
																	3		11220.2	1.38227
																	4		14671	1.45934
																	5		11545.6	1.76616
																	6		13147.6	1.99287

## Sheet: Fig 3S1C
	Representative trace of cytosolic calcium					Tg		SOCE
	time/sec	shScramble	shSTIM1			shScr	shSTIM1	shSc	shSTIM1
	0	0.980697	0.984057		1	2.79774	2.35717	3.84699	1.0363
	5	0.983879	0.985101		2	2.40917	2.53451	3.52241	1.03215
	10	0.983613	0.983165		3	2.27481	2.57291	3.63179	1.29583
	15.001	0.99021	0.987346		4	3.06138	2.46424	2.13998	1.37593
	20.001	0.993642	0.989169		5	2.09163	2.8064	2.79279	2.43168
	25.002	0.99429	0.990166		6	2.62928	2.03147	3.25006	1.02551
	30.003	0.995962	0.990684		7	2.71104	2.43478	3.37104	2.59205
	35.003	0.998518	0.994701		8	2.67082	1.53543	1.56781	1.02137
	40.004	1.00232	1.00056		9	2.27273	2.0737	1.40182	1.23279
	45.004	1.00104	1.00156		10	2.23537	2.64144	2.78901	2.00746
	50.004	1.00028	1.00293		11	3.32383	1.56925	3.06164	1.02122
	55.004	0.998563	1.00371		12	3.4686	1.58775	3.77494	1.33749
	60.004	0.995111	1.00031		13	2.8224	2.07362	2.53105	2.77173
	65.005	0.99562	1.0004		14	2.55849	2.11502	3.70082	1.13212
	70.005	0.993672	0.997549		15	2.95035	2.28357	1.21913	1.03193
	75.005	0.995886	0.995657		16	3.54392	2.11723	1.22223	1.01868
	80.005	0.99188	0.989148		17	4.1421	1.69204	1.25329	1.13689
	85.005	0.995151	0.987893		18	1.82239	1.89587	1.3794	1.07621
	90.005	0.991731	0.98272		19	1.25035	1.79225	3.36883	1.05935
	95.005	0.987502	0.978501		20	2.24451	2.54437	2.43346	1.08262
	100.005	0.985402	0.976553		21	2.012	2.16637	2.66135	1.38749
	105.005	0.98586	0.979943		22	1.6374	2.13986	2.37078	1.4403
	110.005	0.989021	0.9827		23	1.40495	2.23712	2.30729	2.19689
	115.005	0.987974	0.982733		24	2.80468	2.5869	2.18024	1.01322
	120.005	0.989139	0.98498		25	1.69121	1.78936	4.55597	1.06414
	125.005	0.989879	0.986913		26	1.5185	2.48433	2.60998	2.57664
	130.005	0.990641	0.986662		27	1.35767	2.25668	3.09761	1.1036
	135.005	0.992674	0.989573		28	1.41535	2.19595	2.06063	1.03034
	140.005	0.994759	0.99099		29	1.62644	4.53098	1.74978	1.02712
	145.005	0.996838	0.991649		30	1.42201	2.16986	2.7873	1.03194
	150.005	0.994221	0.989717		31	1.57181	5.87406	3.24951	1.10142
	155.005	0.992675	0.987981		32	1.29813	2.17471	2.44373	1.03879
	160.005	0.989698	0.988367		33	1.65156	2.15938	1.7115	1.04998
	165.005	0.987677	0.988938		34	2.04827	2.72141	2.48567	1.05719
	170.005	0.985837	0.990206		35	1.23437	2.55131	4.26261	1.33074
	175.005	0.985933	0.993357		36	2.63655	2.58428	2.85713	2.98505
	180.006	0.986022	0.994857		37	2.27186	1.31207	2.50761	1.02711
	185.007	0.985798	0.995892		38	1.29528	1.64553	2.97013	1.06871
	190.007	0.982013	0.990987		39	1.31743	2.55828	3.07232	1.0494
	195.007	0.979996	0.988659		40	1.37605	2.89887	1.86486	3.09972
	200.007	0.979954	0.989205		41	1.38925	2.17517	2.0401	1.02662
	205.007	0.976999	0.986835		42	1.39642	2.34454	3.47167	1.26847
	210.007	0.975733	0.982589		43	1.75481	1.77807	2.12513	1.20344
	215.007	0.97303	0.977668		44	1.21168	3.12999	3.22831	1.14531
	220.007	0.973394	0.975306		45	1.67295	2.73319	3.89787	1.0894
	225.007	0.979664	0.981218		46	1.60746	3.34581	2.38352	3.72749
	230.007	0.997103	0.995733		47	1.06104	2.83627	2.65024	1.04263
	235.007	1.03276	1.02453		48	1.14207	3.84243	1.59158	1.13159
	240.007	1.07742	1.06766		49	1.14081	2.67741	1.46795	1.03599
	245.007	1.14123	1.12594		50	1.56055	2.13365	1.22777	1.069
	250.007	1.22005	1.19871		51	1.35095	2.41081	3.22488	1.19856
	255.007	1.31884	1.28296		52	3.36595	2.41881	2.72984	1.00212
	260.007	1.42153	1.36998		53	2.81539	2.42184	3.27505	1.16471
	265.007	1.52935	1.46963		54	2.85749	2.47807	3.76915	3.34675
	270.007	1.64691	1.56767		55	3.16907	1.77774	4.64328	1.13459
	275.007	1.76351	1.66099		56	2.53901	2.83401	2.83305	1.32194
	280.007	1.87511	1.74643		57	2.94353	2.5578	3.44294	1.33873
	285.007	1.9824	1.82103		58	3.64041	1.74709	2.38028	1.15104
	290.007	2.07068	1.88126		59	2.93273	2.11921	4.39776	1.07254
	295.007	2.15316	1.9364		60	2.35821	1.78489	5.69789	1.04396
	300.007	2.21913	1.97457		61	2.57781	3.14384	5.76026	3.20451
	305.007	2.26914	1.99965		62	3.94198	1.8359	1.40439	1.01737
	310.008	2.30793	2.01883		63	2.89676	2.06557	1.8362	2.81163
	315.008	2.33448	2.02757		64	3.05368	1.05591	2.44601	1.1016
	320.008	2.35288	2.03459		65	2.28164	1.24403	1.94179	1.04283
	325.008	2.36169	2.03351		66	2.46266	1.24131	2.10541	1.18477
	330.008	2.35679	2.02929		67	2.30767	1.04277	2.20363	1.054
	335.008	2.33781	2.02218		68	3.7715	1.04158	2.51634	1.27225
	340.008	2.32448	2.01053		69	2.66436	1.09602	1.72063	1.16542
	345.009	2.29965	1.99208		70	2.59477	1.02956	1.87173	1.09147
	350.009	2.27415	1.97176		71	1.96342	1.09612	2.97218	2.18519
	355.009	2.24166	1.93969		72	3.47482	1.22203	2.74782	1.03938
	360.009	2.2031	1.90875		73	2.51584	1.39929	1.96831	1.05744
	365.009	2.16299	1.87745		74	2.8838	1.11551	1.27802	1.26016
	370.009	2.11574	1.83924		75	2.04748	1.21559	1.03198	1.15889
	375.009	2.06978	1.8005		76	2.32759	1.13606	1.57923	1.15078
	380.009	2.03303	1.76785		77	2.12103	1.14629	1.70406	1.11676
	385.009	2.00068	1.74025		78	1.94257	1.18643	1.69063	1.11387
	390.009	1.97143	1.71883		79	1.80548	1.02615	2.22522	2.0262
	395.009	1.94023	1.70004		80				1.6095
	400.009	1.91108	1.68227		81				1.359
	405.01	1.8832	1.66251		82				1.50184
	410.01	1.86024	1.64693		83				1.38213
	415.01	1.82586	1.62764		84				1.43671
	420.01	1.80559	1.611		85				1.34361
	425.01	1.77764	1.58792		86				1.33659
	430.01	1.75171	1.57023		87				1.67883
	435.01	1.71791	1.54484		88				1.34434
	440.01	1.68962	1.52205		89				1.37904
	445.01	1.65864	1.4987		90				1.37079
	450.01	1.63951	1.48076		91				1.25712
	455.01	1.62684	1.46487		92				1.57501
	460.01	1.60069	1.44515		Average	2.25844	2.13984	2.62717	1.40808
	465.01	1.57897	1.42729		SD	0.763203	0.80525	0.997331	0.607357
	470.01	1.55957	1.4086		SE	0.085867	0.0905977	0.112208	0.0633214
	475.01	1.5492	1.3949		N	79	79	79	92
	480.01	1.53742	1.3877					Unpaired t test between:
	485.01	1.52077	1.3765					p-value	*p< 0.0001
	490.01	1.51738	1.36875
	495.01	1.49858	1.35596
	500.01	1.48677	1.34663
	505.01	1.47073	1.33177
	510.01	1.45314	1.31818
	515.01	1.43417	1.3033
	520.01	1.43074	1.29882
	525.01	1.42366	1.28758
	530.01	1.40702	1.27631
	535.01	1.39535	1.26514
	540.01	1.38873	1.25876
	545.01	1.37724	1.24784
	550.01	1.36502	1.24033
	555.01	1.35172	1.22927
	560.01	1.33711	1.22165
	565.01	1.31612	1.20922
	570.01	1.30622	1.2028
	575.01	1.28922	1.19216
	580.01	1.27379	1.18092
	585.01	1.26183	1.17167
	590.01	1.25495	1.16763
	595.01	1.24789	1.15995
	600.01	1.24154	1.15455
	605.01	1.23239	1.1493
	610.01	1.22955	1.14707
	615.01	1.21602	1.13824
	620.01	1.21169	1.13576
	625.01	1.19666	1.12623
	630.01	1.1894	1.1237
	635.01	1.17895	1.1165
	640.01	1.1729	1.1132
	645.01	1.16177	1.10764
	650.01	1.15064	1.10003
	655.01	1.14205	1.09382
	660.01	1.13631	1.09051
	665.01	1.13031	1.08625
	670.01	1.12459	1.08257
	675.011	1.11267	1.07592
	680.011	1.10742	1.07205
	685.012	1.10396	1.07129
	690.012	1.09616	1.06685
	695.012	1.08381	1.06023
	700.012	1.0834	1.06135
	705.012	1.07412	1.05545
	710.012	1.07018	1.05288
	715.012	1.0617	1.04728
	720.012	1.05726	1.0453
	725.012	1.05282	1.04167
	730.013	1.04719	1.03914
	735.013	1.03784	1.03311
	740.013	1.02944	1.0277
	745.013	1.02145	1.02298
	750.013	1.01619	1.02088
	755.013	1.0131	1.02002
	760.013	1.00497	1.01584
	765.013	1.00429	1.01652
	770.013	0.999023	1.01347
	775.013	0.996612	1.01001
	780.013	0.994816	1.00438
	785.013	0.991088	1.00131
	790.013	0.988336	1.00003
	795.013	0.978764	0.996554
	800.013	0.958783	0.994097
	805.013	0.949082	0.994298
	810.013	0.946977	0.99278
	815.013	0.956322	0.992772
	820.013	0.99413	0.996549
	825.013	1.06056	1.00487
	830.013	1.15271	1.01566
	835.013	1.27132	1.029
	840.013	1.39135	1.03677
	845.013	1.52834	1.05082
	850.013	1.66361	1.05906
	855.013	1.79532	1.07021
	860.013	1.91387	1.07868
	865.013	2.01041	1.08803
	870.013	2.08117	1.09217
	875.013	2.13826	1.09745
	880.013	2.1815	1.09867
	885.013	2.21258	1.10263
	890.014	2.24322	1.10848
	895.014	2.2676	1.11329
	900.014	2.28365	1.11759
	905.014	2.30259	1.12632
	910.014	2.29809	1.1285
	915.014	2.29811	1.13278
	920.014	2.28716	1.13127
	925.014	2.2832	1.13103
	930.014	2.28642	1.13325
	935.014	2.27642	1.13311
	940.014	2.26641	1.12839
	945.014	2.2579	1.12696
	950.014	2.24457	1.12304
	955.014	2.22593	1.1189
	960.014	2.22173	1.11575
	965.014	2.23001	1.11746
	970.015	2.23247	1.12039
	975.015	2.22121	1.12126
	980.015	2.20014	1.11782
	985.015	2.20002	1.12018
	990.015	2.19329	1.11967
	995.015	2.20067	1.12244
	1000.01	2.20426	1.12735
	1005.01	2.20107	1.12787
	1010.01	2.19746	1.12369
	1015.01	2.17902	1.11741
	1020.01	2.15686	1.11107
	1025.02	2.1388	1.10498
	1030.02	2.1366	1.10373
	1035.02	2.14166	1.10812
	1040.02	2.1359	1.10909
	1045.02	2.11159	1.10492
	1050.02	2.09852	1.1023
	1055.02	2.09327	1.10344
	1060.02	2.09029	1.10424
	1065.02	2.09182	1.10767
	1070.02	2.0878	1.10847
	1075.02	2.08537	1.10695
	1080.02	2.07188	1.10193
	1085.02	2.0536	1.09706
	1090.02	2.04408	1.09581
	1095.02	2.0306	1.09301

## Sheet: Fig 3S1D
	Quantification WB								Quantification WB
	pJNK								peIF2 alpha
		0'		30'		90'				0'		30'		90'
		shSCR	shSTIM1	shSCR	shSTIM1	shSCR	shSTIM1			shSCR	shSTIM1	shSCR	shSTIM1	shSCR	shSTIM1
	1	757.698	1025.77	6532.71	9966.08	1760.79	3923.28		1	4120.05	5618.12	8142.66	12219.6	5007.47	6990.07
	2	697.284	1228.01	6335.47	8749.25	2059.5	4618.93		2	3859.1	5145.42	10155.6	14878.1	6404.54	6164.95
	3	10611.3	11891.9	19484.7	40087.1	11300.7	22759.7		3	3854.83	6423.8	9694	11387.4	6405.97	8306.51
	4	7433.86	14660	13406.3	39114.1	9994.15	18087.1		4	3893.49	4589.02	8597.05	11303.8	5916.56	7886.05
	tubulin								tubulin
		0'		30'		90'				0'		30'		90'
		shSCR	shSTIM1	shSCR	shSTIM1	shSCR	shSTIM1			shSCR	shSTIM1	shSCR	shSTIM1	shSCR	shSTIM1
	1	26575.6	30896	29263.6	27921	30340	31968.5		1	7330.15	5846.08	7518.98	7491.69	7150.98	7831.98
	2	30065.3	32075.3	27100.4	31240.5	30293	33385.8		2	7273.28	7575.81	6185.15	7411.1	7711.57	7719.64
	3	4467.03	1744.08	4761.81	2325.62	4360.98	4238.84		3	4467.03	1744.08	4761.81	2325.62	4360.98	4238.84
	4	4409.93	2540.5	3828.52	2656.1	4077.33	2441.33		4	4409.93	2540.5	3828.52	2656.1	4077.33	2441.33
	pJNK/tubulin								peIF2 alpha/tubulin
		0'		30'		90'				0'		30'		90'
		shSCR	shSTIM1	shSCR	shSTIM1	shSCR	shSTIM1			shSCR	shSTIM1	shSCR	shSTIM1	shSCR	shSTIM1
	1	0.0285111	0.0332007	0.223236	0.356939	0.0580353	0.122723		1	0.562069	0.961007	1.08295	1.63109	0.700249	0.892504
	2	0.0231923	0.0382853	0.233778	0.280061	0.0679859	0.13835		2	0.530587	0.67919	1.64193	2.00754	0.83051	0.798606
	3	2.37547	6.81844	4.09187	17.2372	2.59132	5.36933		3	0.862951	3.6832	2.03578	4.89651	1.46893	1.95962
	4	1.68571	5.77054	3.50171	14.7261	2.45115	7.40874		4	0.882891	1.80635	2.24553	4.25576	1.45109	3.23023
	pJNKtubulin normalized by control								peIF2 alpha/loading control normalized by tubulin
		0'		30'		90'				0'		30'		90'
		shSCR	shSTIM1	shSCR	shSTIM1	shSCR	shSTIM1			shSCR	shSTIM1	shSCR	shSTIM1	shSCR	shSTIM1
	1	1.01825	1.18574	7.97273	12.7478	2.07269	4.38297		1	1.0037	1.71608	1.93383	2.91266	1.25044	1.59376
	2	0.828297	1.36733	8.3492	10.0022	2.42807	4.94107		2	0.947476	1.21284	2.93201	3.58489	1.48305	1.42608
	3	1.00231	2.87698	1.72653	7.27308	1.09338	2.26554		3	1.00343	4.28279	2.36718	5.69361	1.70806	2.27863
	4	0.71127	2.43483	1.47751	6.21356	1.03424	3.12605		4	1.02662	2.10041	2.61108	4.94856	1.68731	3.75608
	Average	0.890032	1.96622	4.88149	9.05915	1.6571	3.67891		Average	0.995305	2.32803	2.46103	4.28493	1.53222	2.26364
	SD	0.146985	0.819938	3.79129	2.93161	0.700675	1.20996		SD	0.0336871	1.3529	0.420745	1.26464	0.213531	1.06111
	SE	0.0734926	0.409969	1.89564	1.4658	0.350337	0.604981		SE	0.0168436	0.67645	0.210372	0.632321	0.106766	0.530554
	N	4	4	4	4	4	4		N	4	4	4	4	4	4
			pJNK, unpaired t test between:			p-value					peIF2, unpaired t test between:			p-value
			0'	shSCR	shSTIM1	0.0415	*				0'	shSCR	shSTIM1	n.s
			30'	shSCR	shSTIM1	n.s					30'	shSCR	shSTIM1	0.03
			90'	shSCR	shSTIM1	0.027	#				90'	shSCR	shSTIM1	n.s

## Sheet: Fig3 S2A
		STIM1			non specific band			Ratio STIM1/ non specific band			Ratio STIM1/non specific band normalized by control
		WT	het	STIM1Δ Liver	WT	het	STIM1Δ Liver	WT	het	STIM1Δ Liver	WT	het	STIM1Δ Liver
	1	20574.1	14805.9	3801.52	10413.7	9403.72	11127.8	1.97568	1.57447	0.341624	0.997816	0.795187	0.172538
	2	22954.5	15927.9	3164.03	12341.3	9051.48	10838	1.85997	1.7597	0.291939	0.939381	0.88874	0.147444
	3	21142.4	16954.3	2337.79	12122	12090.4	8537.18	1.74413	1.4023	0.273836	0.880874	0.708234	0.138301
	4	21460.8		2811.74	10203.8		8403.43	2.10322		0.334594	1.06223		0.168987
		17115		1556.36	6512.65		5016.01	2.62796		0.310277	1.32725		0.156706
	Average										0.939357	0.797387	0.152761
	SD										0.0778056	0.0902731	0.0165926
	SE										0.0347957	0.0521192	0.00677391
	N										5	3	6
											p value	*	< 0.0001
		STIM2			non specific band			Ratio STIM2/ non specific band			Ratio STIM2/non specific band normalized by control
		WT	het	STIM1Δ Liver	WT	het	STIM1Δ Liver	WT	het	STIM1Δ Liver	WT	het	STIM1Δ Liver
	1	4001.26	3957.84	6413.84	10413.7	9403.72	11127.8	0.384229	0.42088	0.576382	1.01113	1.10758	1.51679
	2	4812.45	4578.13	7985.96	12341.3	9051.48	10838	0.389946	0.505789	0.736847	1.02617	1.33102	1.93907
	3	3891.08	5997.26	5023.72	12122	12090.4	8537.18	0.320993	0.496036	0.588452	0.844719	1.30536	1.54856
	4	3247.01		5983.26	10203.8		8403.43	0.318215		0.712002	0.837409		1.87369
		3371.77		5270.08	6512.65		5016.01	0.517726		1.05065	1.36244		2.76487
	Average										0.960674	1.24799	1.66814
	SD										0.102758	0.122271	0.21779
	SE										0.0459547	0.0705934	0.0889125
	N										5	3	6
											p value	*	0.0057

## Sheet: Fig3 S2B
	Body weight gain over time
		CHOW						HFD
		WT			STIM1Δ Liver			WT			STIM1Δ Liver
	age (weeks)	mean	SD	N	mean	SD	N	mean	SD	N	mean	SD	N
	4.5	18.86	1.27852	5	19.1875	0.832474	8
	5.5	20.3	0.721803	5	20.325	0.50806	8	21.5381	0.248182	21	21.1833	0.224227	6
	6.5	23.06	0.722219	5	23.2375	0.556435	8	21.4952	0.252556	21	21.3667	0.33731	6
	7.8	24.46	0.646993	5	24.3375	0.546396	8	26.0191	0.384993	21	25.5833	0.572955	6
	8.5	24.94	0.59716	5	25.0375	0.63413	8	28.5286	0.484431	21	28.3833	0.760007	6
	9.5	24.82	0.601166	5	24.4688	0.578555	8	30.8857	0.553701	21	30.45	0.823711	6
	10.5	26.28	0.664379	5	25.975	0.651578	8	31.719	0.605358	21	31.0833	0.870791	6
	11.5	26.64	0.669776	5	26.45	0.60208	8	33.7952	0.683251	21	33.8	1.10242	6
	12.5	27.34	0.73253	5	26.875	0.547315	8	36.0762	0.759665	21	35.8	0.975363	6
	13.5	26.58	0.808332	5	26.6	0.543796	8	38.4952	0.855917	21	38.1667	1.18678	6
	14.5	28.32	0.842259	5	28.35	0.564105	8	39.6143	0.920825	21	39.15	1.21648	6
	15.5	28.48	0.79712	5	28.625	0.608203	8	41.9667	0.932389	21	41.7833	1.38357	6
	16.5	27.94	1.32235	5	28.8625	0.5843	8	43.2381	0.941616	21	43.0833	1.43815	6
	17.5	26.96	0.76	5	27.4375	0.716374	8	44.5619	0.881759	21	44.1333	1.30452	6
	18.5	29.74	0.677938	5	30.3375	0.769726	8	45.3524	0.803434	21	44.8833	1.12232	6
	19.5	29.76	0.679411	5	29.8625	0.737016	8	45.5095	0.740042	21	44.8167	0.947072	6
	20.5	30.02	0.617576	5	29.7125	0.714752	8	46.3667	0.76958	21	45.4667	0.968045	6

## Sheet: Fig 3S2C
		Glucose tolerance test
		WT
		time(min)	1	2	3	4	5	6	7	8	9	10	mean	SD	SE	N
		0	105	100	106	135	109	93	122	90	122	102	108.4	14.0728	4.45022	10
		15	369	338	405	436	338	306	361	295	335	261	344.4	51.623	16.3246	10
		30	453	385	471	508	421	372	521	351	473	399	435.4	58.5039	18.5006	10
		60	284	311	400	267	391	350	437	291	373	259	336.3	62.2987	19.7006	10
		90	238	250	319	270	265	192	280	174	282	177	244.7	49.0375	15.507	10
		120	213	206	205	199	198	199	285	189	245	169	210.8	32.3206	10.2207	10
		Glucose tolerance test
		STIM1 KO
		time(min)	1	2	3	4	5	6	7	mean	SD	SE	N	p value
		0	105	126	108	140	155	162	139	133.571	21.8545	8.26022	7	n.s
		15	300	323	324	282	345	376	360	330	32.9899	12.469	7	n.s
		30	371	432	409	508	467	538	416	448.714	58.8606	22.2472	7	n.s
		60	312	400	305	472	457	572	516	433.429	100.349	37.9284	7	*p=0.02
		90	229	273	276	447	268	395	412	328.571	86.4424	32.6722	7	*p=0.02
		120	199	198	200	454	235	377	220	269	103.399	39.0811	7	n.s
														Unpaired t test between WT and STIM1 KO

## Sheet: Fig 3S2D
				Quantification WB A.U.						Quantification WB A.U.
				pIR						AKT
				WT		STIMKO				WT		STIMKO
				PBS	Insulin	PBS	Insulin			PBS	Insulin	PBS	Insulin
				1.0001	4.9956	1.1688	2.5988			1	7.2014	0.3986	4.6593
					4.8247	1.073	2.2985				7.4514	0.4049	3.8582
					4.4071		3.8792				7.0141		6.1428
							3.5768						6.4663
							3.8125						5.9941
							3.1726						6.1166
			Average	1.0001	4.74247	1.1209	3.22307		Average	1	7.2223	0.40175	5.53955
			SD		0.302745		0.655767		SD		0.219398		1.03578
			SE		0.17479		0.267716		SE		0.126669		0.422854
			N	1	3	2	6		N	1	3	2	6
			Unpaired t test between WT Insulin versus STIM1 KO insulin						Unpaired t test between WT Insulin versus STIM1 KO insulin
							p=0. 007						p=0. 03

## Sheet: Fig3 S2E
	Tg measurments
		ug/mg tissue
		WT	STIM1 KO
	1	21.3359	60.7077
	2	42.2755	70.506
	3	58.4922	56.1859
	4	64.4555	51.6415
	5	67.2215	61.3947
	6	38.2984	51.2105
	7	22.3712	30.309
	8	55.0597
	9	32.2027
	10	19.1651
	11	45.5893
	Average	42.4061	54.565
	SD	18.3374	12.5782
	SE	5.52893	4.75413
	N	11	7
	p value		0.13

## Sheet: Fig3 S2F
	Glucose tolerance test
	WT
	time(min)	1	2	3	4	5	6	7	8	9	10	11	mean	SD	SE	N
	0	143	124	157	123	127	153	163	156	119	114	152	139.182	5.41012	1.63121	11
	15	429	388	404	439	520	438	441	493	317	405	408	425.636	16.0806	4.84849	11
	30	459	432	464	378	500	486	504	477	391	379	355	438.636	16.3353	4.92527	11
	60	326	349	431	335	344	331	416	392	292	362	294	352	13.6448	4.11408	11
	90	295	300	367	272	233	263	368	312	237	260	279	289.636	13.7353	4.14136	11
	STIM1Δ Liver
	time(min)	1	2	3	4	5	6	7	8	9	10	11	12	13	14	15	16	mean	SD	SE	N
	0	154	145	163	161	138	92	100	175	154	163	140	131	126	177	153	186	147.375	6.4903	1.62257	16
	15	472	524	483	321	554	425	424	419	487	527	432	340	440	481	499	469	456.062	15.7751	3.94378	16
	30	581	567	664	339	552	342	383	423	344	418	539	454	390	607	448	362	463.312	26.5841	6.64602	16
	60	591	697	718	367	348	299	243	284	206	302	462	446	286	600	540	362	421.938	40.6946	10.1737	16
	90	468	511	745	275	331	231	301	255	242	253	324	354	258	667	366	291	367	38.5829	9.64573	16

[truncated: 3 more sheets: Fig3 S2G, Fig3 S2H, Fig3 S2I]
