# Supplementary figures and images for: Defective STIM-mediated store operated Ca2+ entry in hepatocytes leads to metabolic dysfunction in obesity
Source: eLife journal article supplement (doi:10.7554/elife.29968), 2017-12-15

Figure 4- figure supplement 1

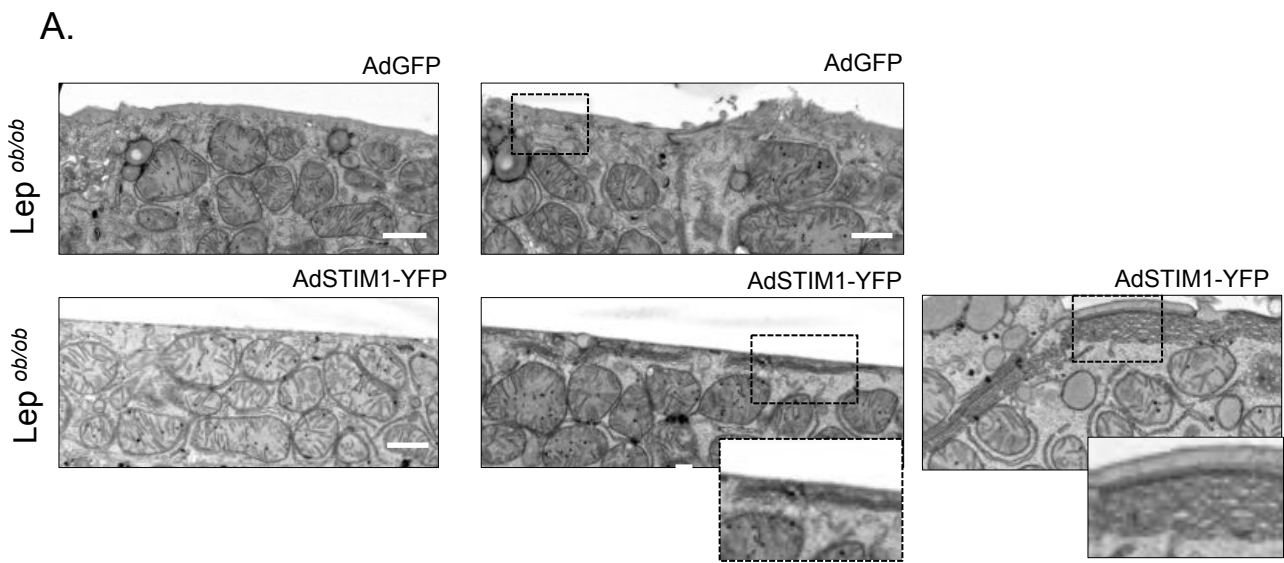

Supplement: supp [file elife-29968-supp-v1.zip]

Figure 1 – figure supplement 3

A.

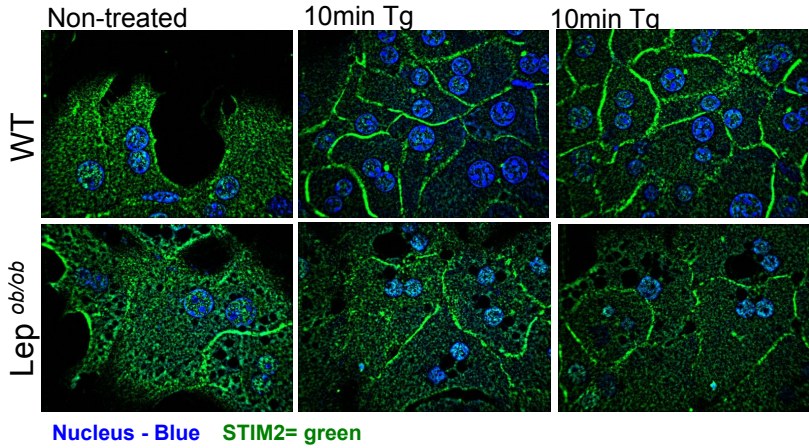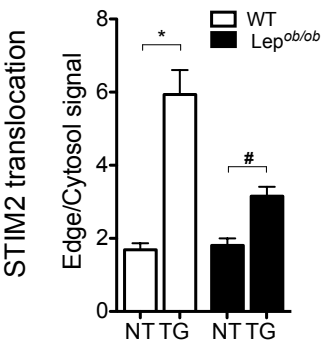

Supplement: supp [file elife-29968-supp-v1.zip]

Figure 1 – figure supplement 2

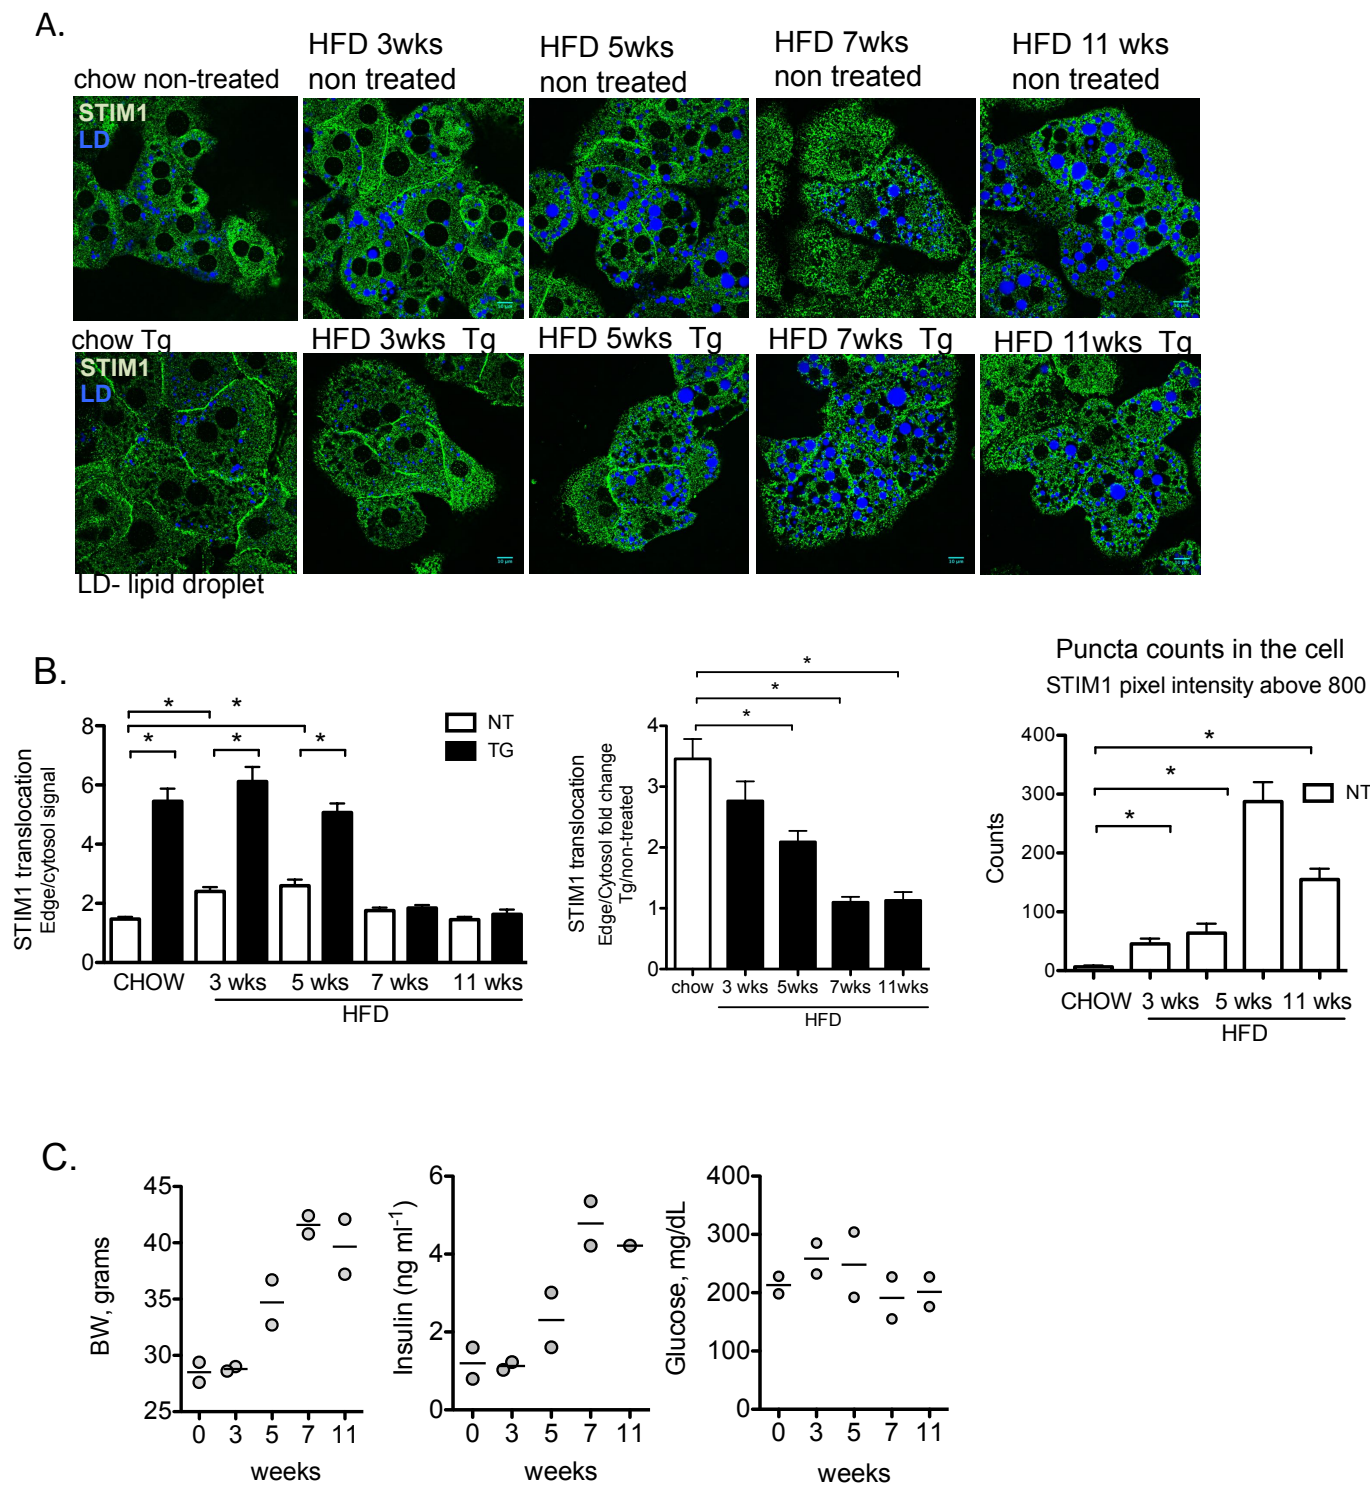

Supplement: supp [file elife-29968-supp-v1.zip]

Figure 3- figure supplement 2

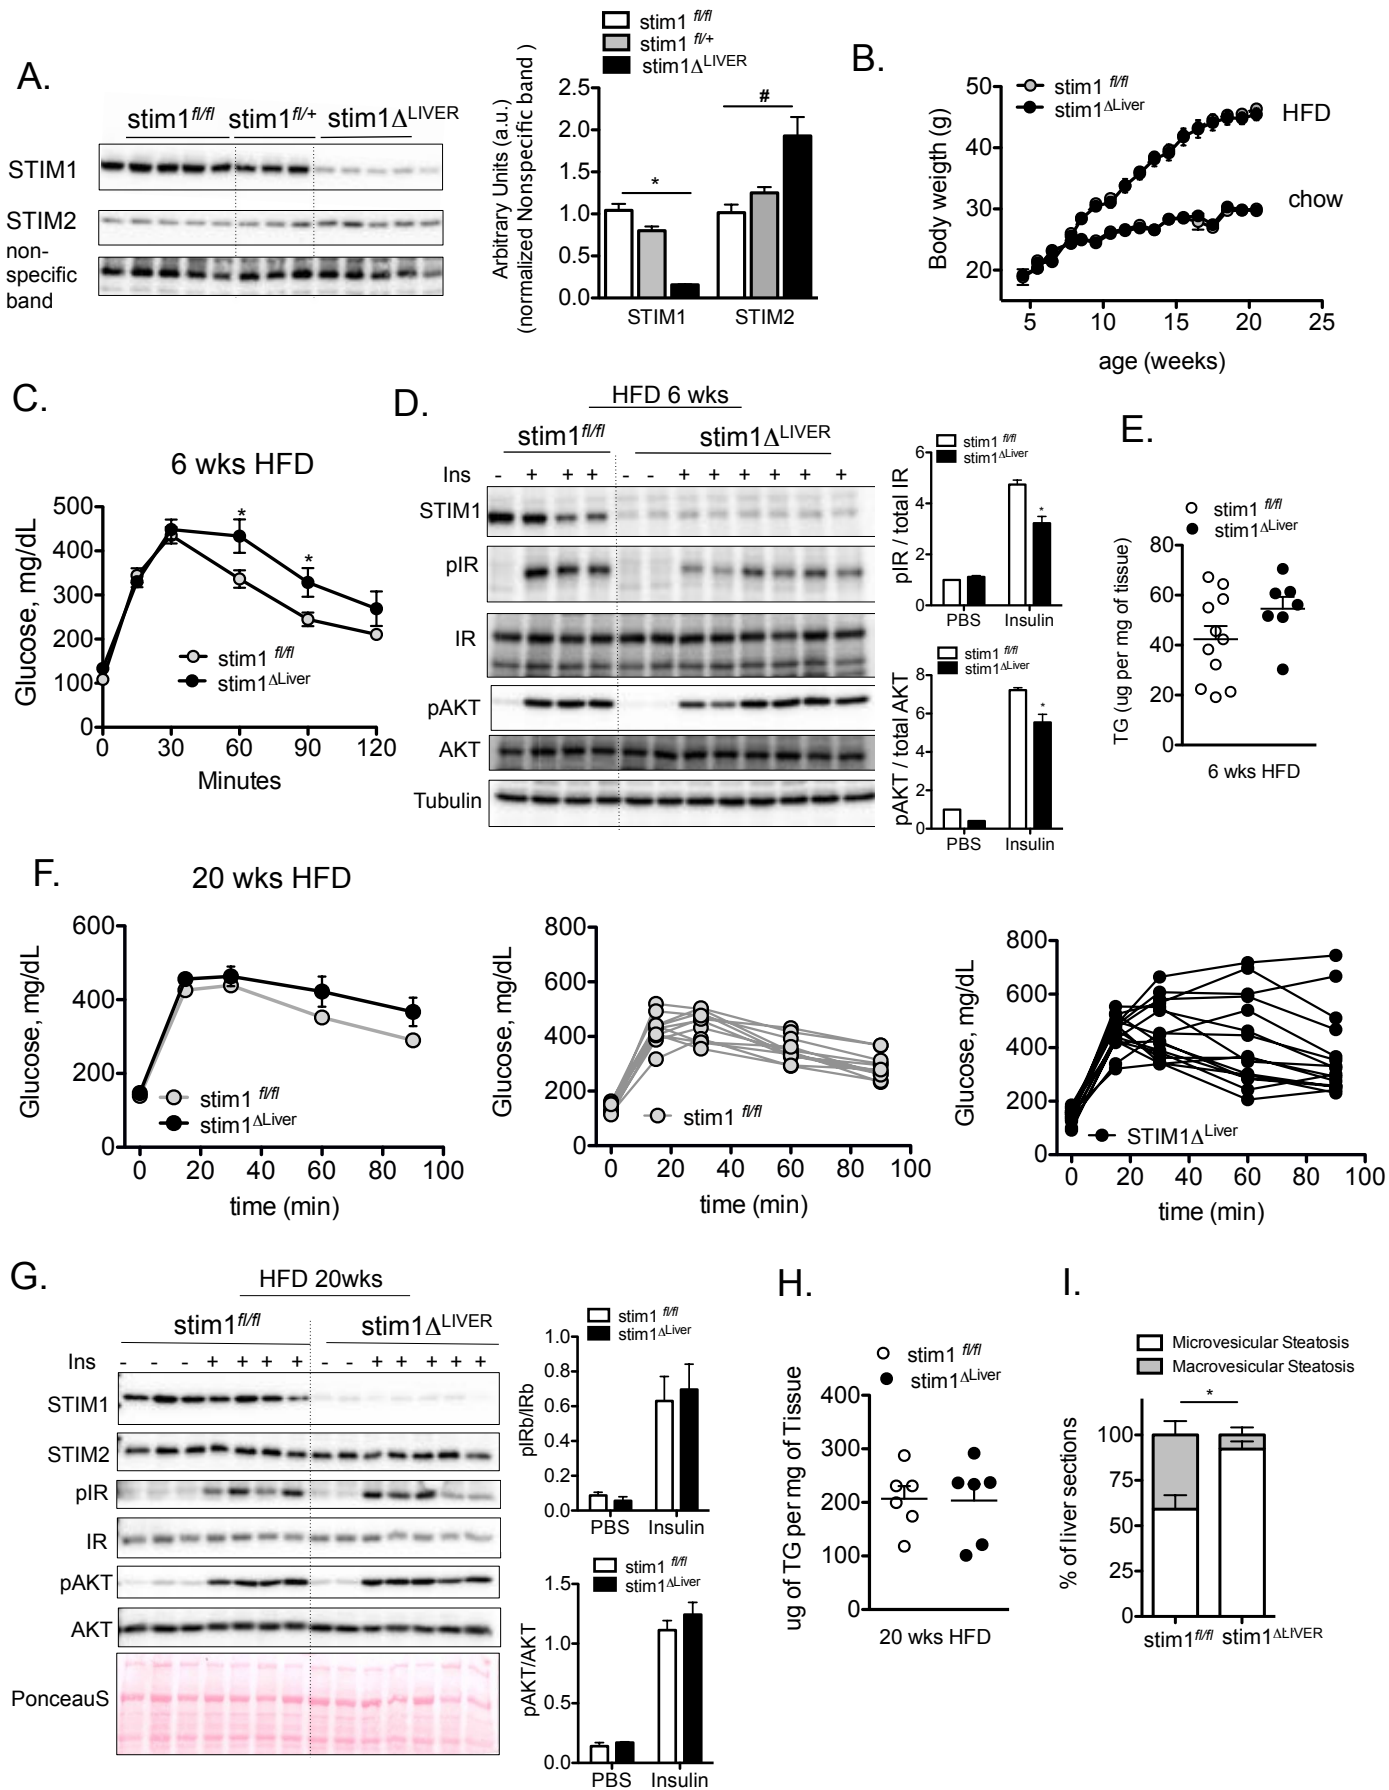

Supplement: supp [file elife-29968-supp-v1.zip]

**Figure 3- figure supplement 1**

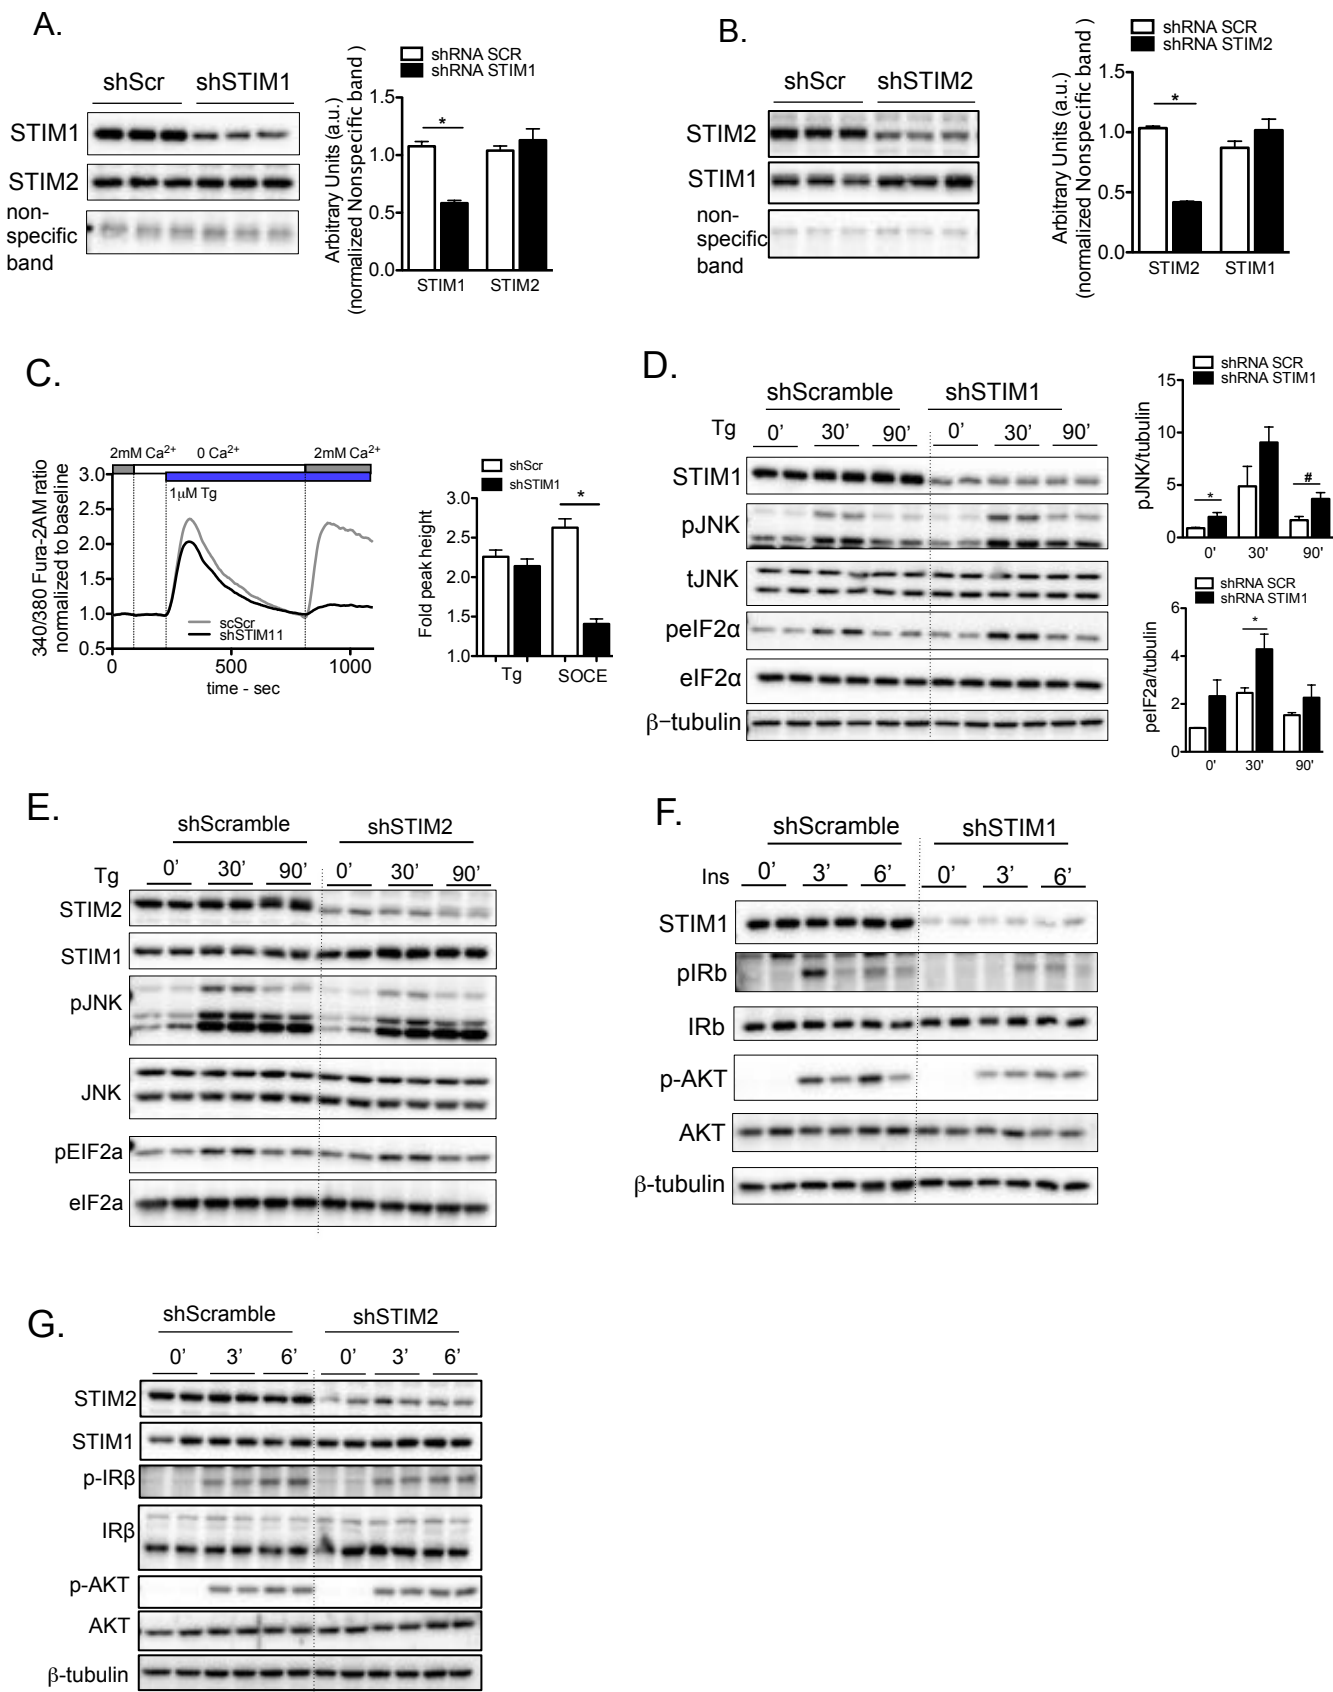

Supplement: supp [file elife-29968-supp-v1.zip]

**Figure 1 – figure supplement 1**

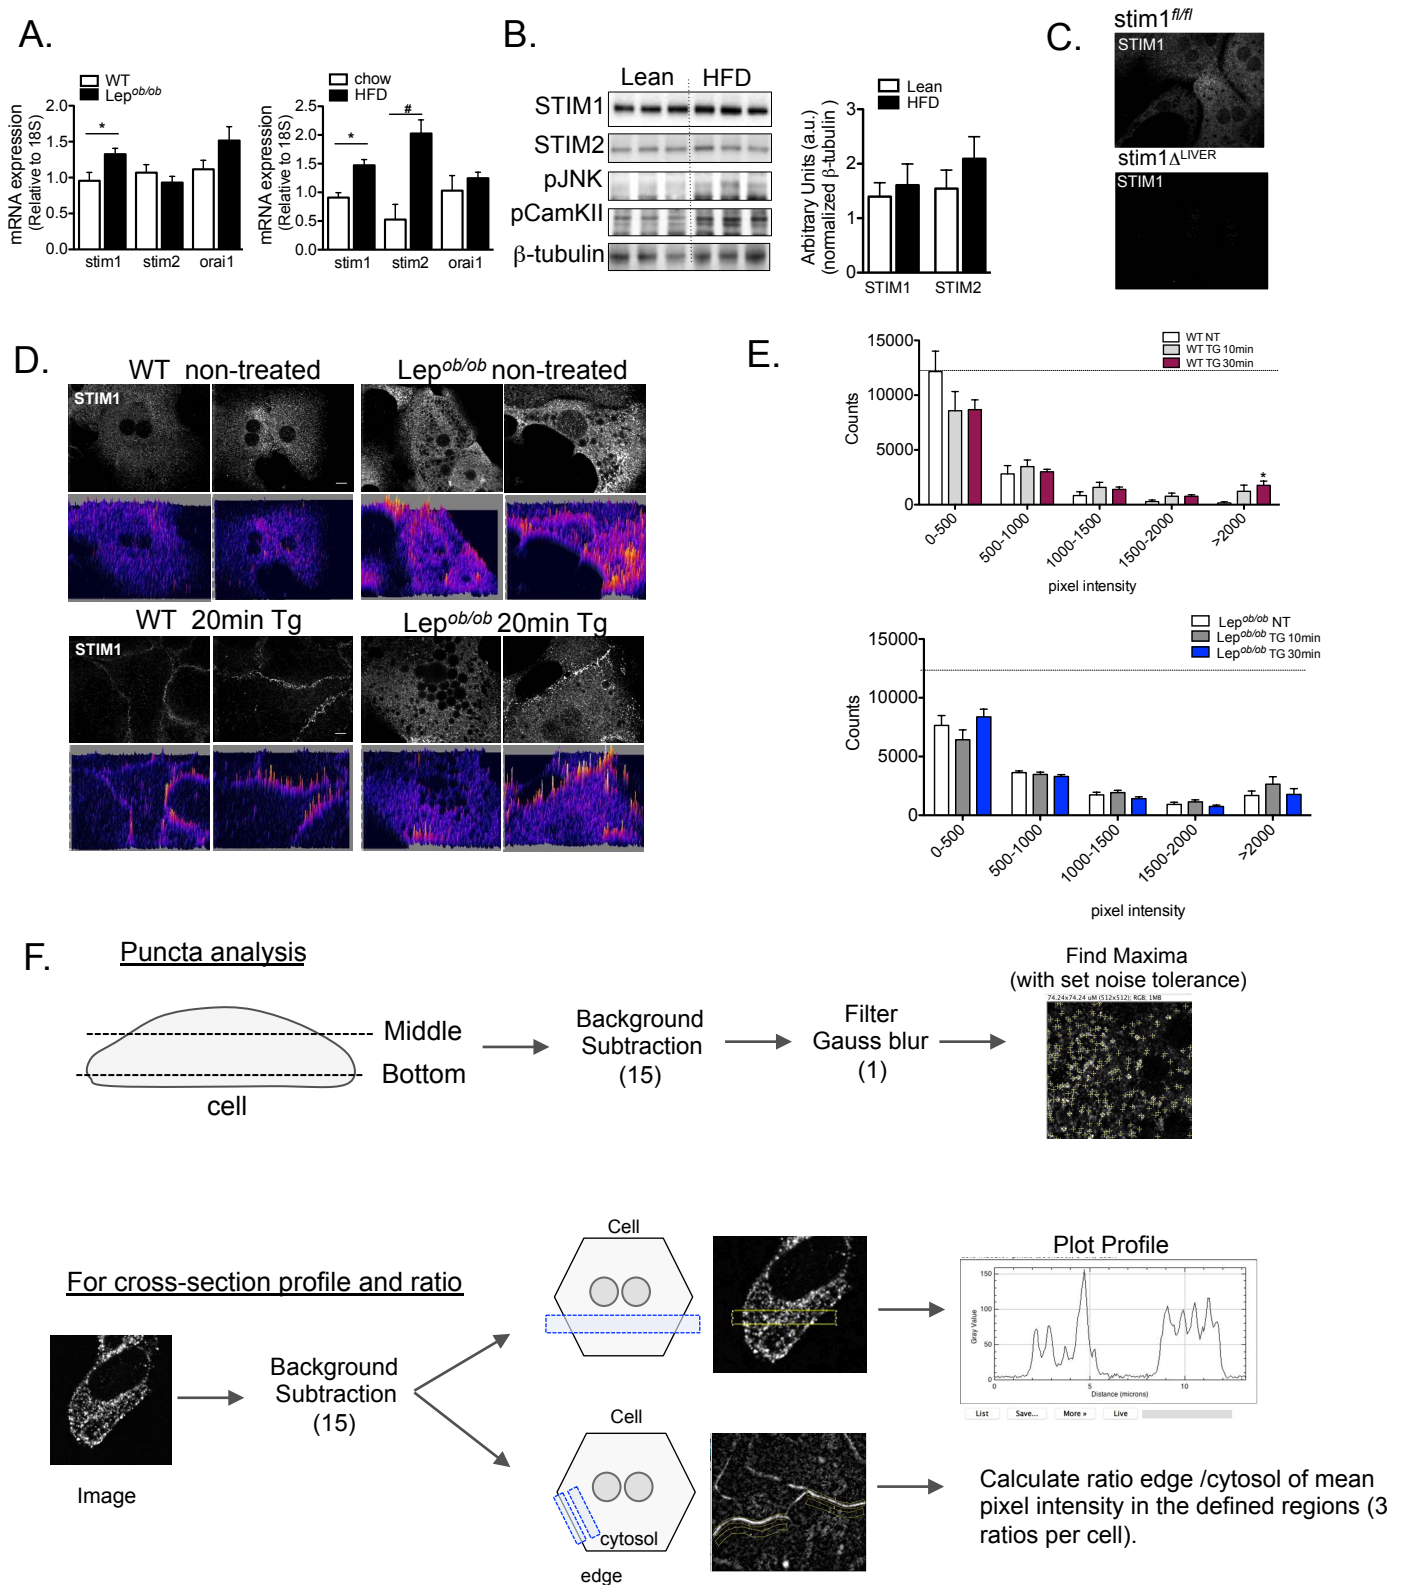

Supplement: supp [file elife-29968-supp-v1.zip]

Figure 5- figure supplement 1

A.

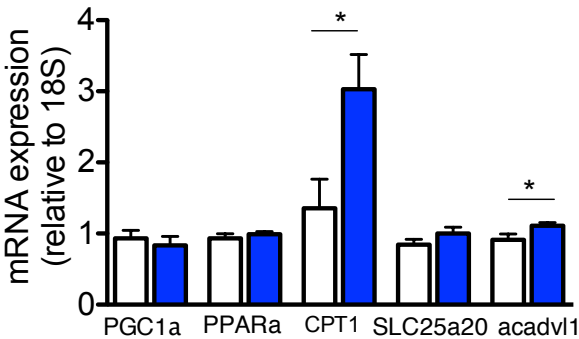

B.

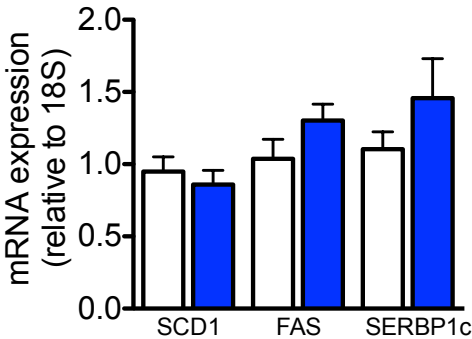

Supplement: supp [file elife-29968-supp-v1.zip]

Figure 2 – figure supplement 1

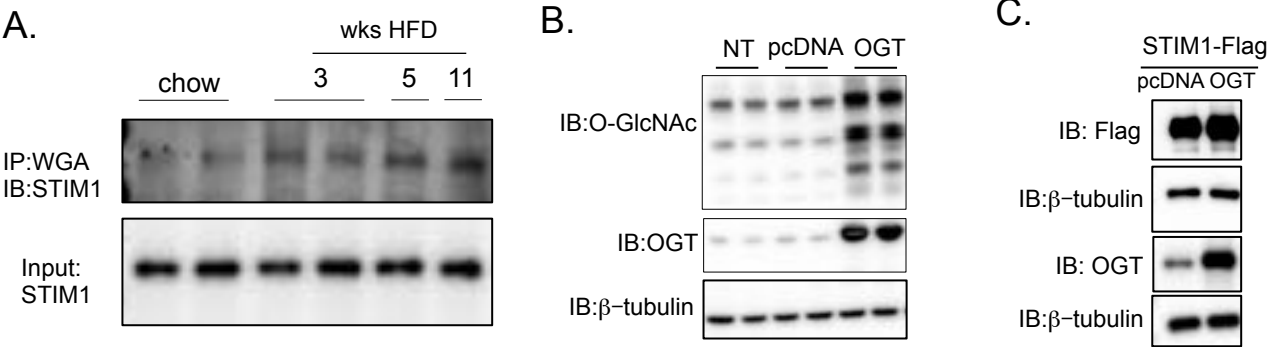

Supplement: supp [file elife-29968-supp-v1.zip]
